# Supplementary material
Source: Royal Society of Chemistry journal article supplement (doi:10.1039/d6cc01304j)

## Table of content

|       |                                                                                                      |    |
|-------|------------------------------------------------------------------------------------------------------|----|
| 1.    | General procedures .....                                                                             | 3  |
| 2.    | Dimerization of piperine .....                                                                       | 4  |
| 2.1.  | Procedure for the dimerization of piperine (solid state) .....                                       | 4  |
| 2.2.  | Screening of photocatalytic conditions for the dimerization of piperine .....                        | 4  |
| 2.3.  | [2+2] cycloadditions dimerization of piperine mediated by Ru(bpy) <sub>3</sub> Cl <sub>2</sub> ..... | 7  |
| 2.4.  | [4+2] cycloadditions dimerization of piperine mediated by Ru(bpy) <sub>3</sub> Cl <sub>2</sub> ..... | 7  |
| 2.5.  | Dipiperamide F ( <b>4</b> ).....                                                                     | 8  |
| 2.6.  | Dipiperamide G ( <b>5</b> ).....                                                                     | 10 |
| 2.7.  | Nigramide R ( <b>6</b> ).....                                                                        | 12 |
| 2.8.  | Chabamide ( <b>10</b> ).....                                                                         | 14 |
| 2.9.  | [4+2] cycloadditions dimerization of piperine mediated by Ir(ppy) <sub>3</sub> .....                 | 16 |
| 2.10. | Z-chabamide ( <b>11</b> ) .....                                                                      | 16 |
| 2.11. | Z-nigramide B ( <b>12</b> ).....                                                                     | 18 |
| 3.    | Synthesis of ilepcimide and piperettine.....                                                         | 20 |
| 3.1.  | 1-(Chloroacetyl)-piperidine ( <b>si-1</b> ).....                                                     | 20 |
| 3.2.  | Diethyl (2-oxo-2-(piperidin-1-yl)-ethyl)-phosphonate ( <b>15</b> ).....                              | 20 |
| 3.3.  | Ilepcimide ( <b>2</b> ).....                                                                         | 21 |
| 3.4.  | Methyl piperate ( <b>13</b> ) .....                                                                  | 22 |
| 3.5.  | (E,E)-5-(1,2-methylenedioxy-benzen-4-yl)-penta-2,4-dien-1-ol ( <b>si-2</b> ).....                    | 23 |
| 3.6.  | (E,E)-5-(1,2-methylenedioxy-benzen-4-yl)-penta-2,4-dienal ( <b>14</b> ) .....                        | 23 |
| 3.7.  | Piperettine ( <b>3</b> ).....                                                                        | 24 |
| 3.8.  | Compound <b>16</b> .....                                                                             | 25 |
| 4.    | Assemblies performed in 3D printed continuous-flow system.....                                       | 28 |
| 4.1.  | Continuous flow reactor.....                                                                         | 28 |
| 4.2.  | Continuous flow assembly of piperine ( <b>1</b> ).....                                               | 29 |
| 5.    | Electrochemical analysis.....                                                                        | 30 |

|      |                                                                         |    |
|------|-------------------------------------------------------------------------|----|
| 5.1. | General procedures for electrochemical analysis .....                   | 30 |
| 5.2. | Cyclic voltammetry of piperine ( <b>1</b> ) [oxidation potential] ..... | 31 |
| 5.3. | Cyclic voltammetry of piperine ( <b>1</b> ) [reduction potential] ..... | 32 |

## 1. General procedures

Reactions were carried out under an argon atmosphere when required. All reagent-grade chemicals and other solvents were obtained from commercial suppliers and were used as received. **Batch reactions** were performed using an Hepatochem® PhotoRedOx Box™ photoreactor: <https://hepatochem.com/photoreactors-leds-accessories/photoredox-box/> **Batch and flow reactions** were performed using a Kessil® PR160L blue LEDs lamp [456 nm] : [https://kessil.com/products/science\\_PR160L.php](https://kessil.com/products/science_PR160L.php) **Analytical and preparative TLC** were performed using Merck silica gel F254 (230-400 mesh) plates and analyzed by direct observation or UV light and by staining upon heating with vanillin solution (2 g vanillin, 1 mL conc. H<sub>2</sub>SO<sub>4</sub>, 100 mL EtOH). **Flash column chromatography** employed VWR (230–400 mesh) silica gel. **Automated chromatography** were performed on a Serlabo Combiflash Ez Prep chromatography system equipped with a Buchi FlashPure silica cartridge. The **NMR spectra** were recorded on a Bruker Avance-300 (300 MHz) spectrometer and on a Bruker Avance-400 (400 MHz) spectrometer and on a Bruker Avance-NEO (ASCEND 500 MHz) equipped with a Cryo-Prob-3mm (500 MHz) spectrometer. <sup>1</sup>H NMR spectra were recorded at 300 MHz or at 400 MHz and residual solvent peaks were used as an internal reference (chloroform-*d* 7.26 ppm, DMSO-*d*<sub>6</sub> 2.50 ppm, methanol-*d*<sub>4</sub> 3.31 ppm). Data are reported as follows: chemical shift in ppm, multiplicity (s = singlet, br s = broad singlet, d = doublet, t = triplet, q = quartet, p = pentuplet, m = multiplet or overlap of non-equivalent resonances), coupling constants, and integration. <sup>13</sup>C{<sup>1</sup>H} NMR spectra were recorded at 75 MHz or at 101 MHz and residual solvent peaks were used as an internal reference (chloroform-*d* d 76.1 ppm, DMSO-*d*<sub>6</sub> 39.5 ppm, methanol-*d*<sub>4</sub> 49.0 ppm) using a UDEFT sequence (Uniform Driven Equilibrium Fourier Transform) or a JMOD sequence (*J*-Modulated Spin-Echo). **IR spectra** were recorded with a Shimadzu IR Affinity-1S spectrometer and are reported in frequency of absorption at the peak maximum (cm<sup>-1</sup>). **HRESIMS** and LC/MS (Agilent HPLC HP1290) were run using Electrospray Ionization (ESI) on an Agilent QToF 6546 spectrometer with a Sunfire® analytical C18 column (150 × 2.1 mm; 3.5 μm, Waters).

## 2. Dimerization of piperine

### 2.1. Procedure for the dimerization of piperine (solid state)

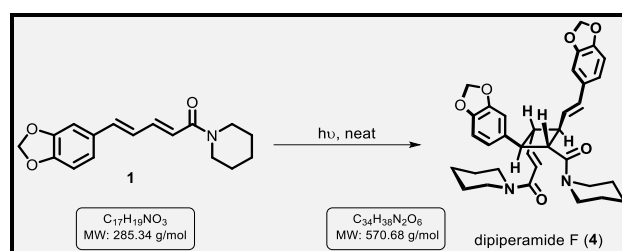

A solution of piperine (**1**) (50 mg, 0.18 mmol) in  $CH_2Cl_2$  (10 mL) was evaporated in a crystallizing dish ( $\varnothing = 8$  cm) and then irradiated with a blue LEDs light [LEDs strip Lights – RGB 5050 RGB – 150 LEDs –  $\sim 465$  nm] for 10 d. Purification by preparative TLC on silica gel (eluent:  $CH_2Cl_2/MeOH$ , 99:1) afforded dipiperamide F (**4**) as a white solid (11 mg, 22 %).

### 2.2. Screening of photocatalytic conditions for the dimerization of piperine

A solution of piperine (**1**) (30 mg, 0.105 mmol, 1.0 equiv), catalyst (0.005 mmol, 0.05 equiv) and additive (see Table S1) in solvent (1.0 mL) was prepared in a glass tube. Solution was irradiated in an Hepatochem® PhotoRedOx Box™ photoreactor equipped with a Kessil® PR160L blue LEDs lamp [456 nm]. After 16 h reaction mixtures were analyzed by HPLC-MS analysis.

**Table S1** : Screening of conditions for the dimerization of piperine (**1**)

| Entry | catalyst                  | conditions                                                      | Result / isolated yield                                     |
|-------|---------------------------|-----------------------------------------------------------------|-------------------------------------------------------------|
| 1     | -                         | Neat 10d<br>white lamp <sup>[a]</sup>                           | > 10 dimers                                                 |
| 2     | -                         | Neat 10d<br>blue LEDs                                           | <b>4</b> : 22%                                              |
| 3     | -                         | $CH_3CN$ , 10d<br>blue LEDs                                     | No reaction                                                 |
| 4     | $Ru(bpy)_3Cl_2$<br>5%-mol | $CH_3CN$ , Ar atm.<br>blue LEDs, 16h                            | Low conversion (<10%)                                       |
| 5     | $Ru(bpy)_3Cl_2$<br>5%-mol | $CH_3CN$ , Air atm.<br>blue LEDs, 16h                           | Low conversion (<10%)                                       |
| 6     | $Ru(bpy)_3Cl_2$<br>5%-mol | $CH_3CN$ , $MVCl_2$ <sup>[a]</sup> (2 equiv).<br>blue LEDs, 16h | Low conversion                                              |
| 7     | $Ru(bpy)_3Cl_2$<br>5%-mol | $CH_3CN$ , 4,4-di-tbu-biphenyl<br>(2 equiv). blue LEDs, 16h     | Low conversion                                              |
| 8     | $Ru(bpy)_3Cl_2$<br>5%-mol | $CH_3CN$ , $iPr_2EtN$ (2.0 equiv.)<br>blue LEDs, 16h            | <b>4</b> : 7%; <b>5</b> : 26% <b>6</b> : 45%                |
| 9     | $Ru(bpy)_3Cl_2$<br>5%-mol | $CH_3CN$ , $iPr_2EtN$ (2.0 equiv.)<br>no light                  | No conversion                                               |
| 10    | $Ru(bpy)_3Cl_2$<br>5%-mol | DMSO, $iPr_2EtN$ (2.0 equiv.)<br>blue LEDs, 16h                 | <b>1</b> : 6%; <b>4</b> : 9%; <b>5</b> : 15% <b>6</b> : 31% |

|    |                                                                |                                                                                                       |                               |
|----|----------------------------------------------------------------|-------------------------------------------------------------------------------------------------------|-------------------------------|
| 12 | Ru(bpy) <sub>3</sub> Cl <sub>2</sub><br>5%-mol                 | DMF, iPr <sub>2</sub> EtN (2.0 equiv.)<br>blue LEDs, 16h                                              | 1: 11%; 4: 10%; 5: 33% 6: 38% |
| 13 | Ru(bpy) <sub>3</sub> Cl <sub>2</sub><br>5%-mol                 | CH <sub>3</sub> CN, iPr <sub>2</sub> EtN (2.0 equiv.), LiBF <sub>4</sub> (4 equiv.), blue LEDs, 16h   | 4: 17%; 6: 15%, 10: 15%       |
| 14 | Ru(bpy) <sub>3</sub> Cl <sub>2</sub><br>5%-mol                 | CH <sub>3</sub> CN, iPr <sub>2</sub> EtN (2.0 equiv.), LiBF <sub>4</sub> (4.0 equiv.), blue LEDs, 40h | 4: 17%; 10: 33%               |
| 15 | Ru(phen) <sub>3</sub> Cl <sub>2</sub><br>5%-mol                | CH <sub>3</sub> CN, Ar atm.<br>blue LEDs, 7d                                                          | 4: 8%; 5: 12% 6: 34%          |
| 16 | Ru(phen) <sub>3</sub> Cl <sub>2</sub><br>5%-mol                | CH <sub>3</sub> CN, Ar atm.<br>blue LEDs, 40h                                                         | < 5% conversion               |
| 17 | Ru(phen) <sub>3</sub> Cl <sub>2</sub><br>5%-mol                | CH <sub>3</sub> CN, iPr <sub>2</sub> EtN (2.0 equiv.)<br>blue LEDs, 40h                               | < 5% conversion               |
| 18 | Ru(phen) <sub>3</sub> Cl <sub>2</sub><br>5%-mol                | CH <sub>3</sub> CN, air atm.<br>blue LEDs, 40h                                                        | < 5% conversion               |
| 19 | Ru(bpz) <sub>3</sub> (PF <sub>6</sub> ) <sub>2</sub><br>5%-mol | CH <sub>3</sub> CN, Ar atm.<br>blue LEDs, 16h                                                         | No conversion                 |
| 20 | Ru(bpz) <sub>3</sub> (PF <sub>6</sub> ) <sub>2</sub><br>5%-mol | CH <sub>3</sub> CN, Air atm.<br>blue LEDs, 16h                                                        | No conversion                 |
| 21 | Ru(bpz) <sub>3</sub> (PF <sub>6</sub> ) <sub>2</sub><br>5%-mol | CH <sub>3</sub> CN, MVCl <sub>2</sub> <sup>[a]</sup> (2 equiv.)<br>blue LEDs, 16h                     | No conversion                 |
| 22 | Ru(bpz) <sub>3</sub> (PF <sub>6</sub> ) <sub>2</sub><br>5%-mol | CH <sub>3</sub> CN, 4,4-di-tbu-biphenyl<br>(2 equiv.) blue LEDs, 16h                                  | No conversion                 |
| 23 | Ru(bpz) <sub>3</sub> (PF <sub>6</sub> ) <sub>2</sub><br>5%-mol | CH <sub>3</sub> CN, iPr <sub>2</sub> EtN (2.0 equiv.)<br>blue LEDs, 16h                               | No conversion                 |
| 24 | Ru(bpm) <sub>3</sub> Cl <sub>2</sub><br>5%-mol                 | CH <sub>3</sub> CN, air atm.<br>blue LEDs, 40h                                                        | < 5% conversion               |
| 25 | Ru(bpm) <sub>3</sub> Cl <sub>2</sub><br>5%-mol                 | CH <sub>3</sub> CN, Ar atm.<br>blue LEDs, 16h                                                         | No conversion                 |
| 26 | Ru(bpm) <sub>3</sub> Cl <sub>2</sub><br>5%-mol                 | CH <sub>3</sub> CN, Air atm.<br>blue LEDs, 16h                                                        | No conversion                 |
| 27 | Ru(bpm) <sub>3</sub> Cl <sub>2</sub><br>5%-mol                 | CH <sub>3</sub> CN, MVCl <sub>2</sub> <sup>[a]</sup> (2 equiv.)<br>blue LEDs, 16h                     | No conversion                 |
| 28 | Ru(bpm) <sub>3</sub> Cl <sub>2</sub><br>5%-mol                 | CH <sub>3</sub> CN, 4,4-di-tbu-biphenyl<br>(2 equiv.) blue LEDs, 16h                                  | No conversion                 |
| 29 | Ru(bpm) <sub>3</sub> Cl <sub>2</sub><br>5%-mol                 | CH <sub>3</sub> CN, iPr <sub>2</sub> EtN (2.0 equiv.)<br>blue LEDs, 16h                               | No conversion                 |
| 30 | Ir(ppy) <sub>3</sub><br>5%-mol                                 | CH <sub>3</sub> CN, iPr <sub>2</sub> EtN (2.0 equiv.)<br>blue LEDs, 16h                               | 11: 53%; 12: 12%              |
| 31 | Ir(ppy) <sub>3</sub><br>5%-mol                                 | CH <sub>3</sub> CN, iPr <sub>2</sub> EtN (2.0 equiv.)<br>no light                                     | No conversion                 |
| 32 | Ir(ppy) <sub>3</sub><br>5%-mol                                 | CH <sub>3</sub> CN, Ar atm.<br>blue LEDs, 16h                                                         | No conversion                 |
| 33 | Ir(ppy) <sub>3</sub><br>5%-mol                                 | CH <sub>3</sub> CN, Air atm.<br>blue LEDs, 16h                                                        | No conversion                 |
| 34 | Ir(ppy) <sub>3</sub><br>5%-mol                                 | CH <sub>3</sub> CN, morpholine (2.0 equiv.)<br>blue LED, 16h                                          | 11: 41%; 12: 19%              |
| 35 | Ir(ppy) <sub>3</sub><br>5%-mol                                 | DMSO, iPr <sub>2</sub> EtN (2.0 equiv.)<br>blue LEDs, 16h                                             | 11: 36%; 12: 8%               |
| 36 | Ir(ppy) <sub>3</sub><br>5%-mol                                 | DMF, iPr <sub>2</sub> EtN (2.0 equiv.)<br>blue LEDs, 16h                                              | 11: 46%; 12: 16%              |
| 37 | [Ir(dtbbpy)(ppy) <sub>2</sub> ]<br>PF <sub>6</sub> 5%-mol      | CH <sub>3</sub> CN, Ar atm.<br>blue LEDs, 16h                                                         | No conversion                 |
| 38 | [Ir(dtbbpy)(ppy) <sub>2</sub> ]<br>PF <sub>6</sub> 5%-mol      | CH <sub>3</sub> CN, Air atm.<br>blue LEDs, 16h                                                        | No conversion                 |
| 39 | [Ir(dtbbpy)(ppy) <sub>2</sub> ]<br>PF <sub>6</sub> 5%-mol      | CH <sub>3</sub> CN, MVCl <sub>2</sub> <sup>[a]</sup> (2 equiv.)<br>blue LEDs, 16h                     | < 15% conversion              |
| 40 | [Ir(dtbbpy)(ppy) <sub>2</sub> ]<br>PF <sub>6</sub> 5%-mol      | CH <sub>3</sub> CN, 4,4-di-tbu-biphenyl<br>(2 equiv.) blue LEDs, 16h                                  | < 15% conversion              |
| 41 | [Ir(dtbbpy)(ppy) <sub>2</sub> ]<br>PF <sub>6</sub> 5%-mol      | CH <sub>3</sub> CN, iPr <sub>2</sub> EtN (2.0 equiv.)<br>blue LEDs, 16h                               | degradation                   |

|    |                                                                                          |                                                                                    |                  |
|----|------------------------------------------------------------------------------------------|------------------------------------------------------------------------------------|------------------|
| 42 | $[\text{Ir}(\text{dFCF}_3\text{ppy})_2-(5,5'\text{-dCF}_3\text{bpy})]\text{PF}_6$ 5%-mol | $\text{CH}_3\text{CN}$ , Ar atm.<br>blue LEDs, 16h                                 | < 10% conversion |
| 43 | $[\text{Ir}(\text{dFCF}_3\text{ppy})_2-(5,5'\text{-dCF}_3\text{bpy})]\text{PF}_6$ 5%-mol | $\text{CH}_3\text{CN}$ , Air atm.<br>blue LEDs, 16h                                | < 10% conversion |
| 44 | $[\text{Ir}(\text{dFCF}_3\text{ppy})_2-(5,5'\text{-dCF}_3\text{bpy})]\text{PF}_6$ 5%-mol | $\text{CH}_3\text{CN}$ , $\text{MVC1}_2^{\text{[a]}}$ (2 equiv).<br>blue LEDs, 16h | degradation      |
| 45 | $[\text{Ir}(\text{dFCF}_3\text{ppy})_2-(5,5'\text{-dCF}_3\text{bpy})]\text{PF}_6$ 5%-mol | $\text{CH}_3\text{CN}$ , 4,4-di-tbu-biphenyl<br>(2 equiv). blue LEDs, 16h          | degradation      |
| 46 | $[\text{Ir}\{\text{dFCF}_3\text{ppy}\}_2(\text{bpy})]\text{PF}_6$<br>5%-mol              | $\text{CH}_3\text{CN}$ , Ar atm.<br>blue LEDs, 16h                                 | No conversion    |
| 47 | $[\text{Ir}\{\text{dFCF}_3\text{ppy}\}_2(\text{bpy})]\text{PF}_6$<br>5%-mol              | $\text{CH}_3\text{CN}$ , Air atm.<br>blue LEDs, 16h                                | No conversion    |
| 47 | $[\text{Ir}\{\text{dFCF}_3\text{ppy}\}_2(\text{bpy})]\text{PF}_6$<br>5%-mol              | $\text{CH}_3\text{CN}$ , $\text{MVC1}_2^{\text{[a]}}$ (2 equiv).<br>blue LEDs, 16h | No conversion    |
| 47 | $[\text{Ir}\{\text{dFCF}_3\text{ppy}\}_2(\text{bpy})]\text{PF}_6$<br>5%-mol              | $\text{CH}_3\text{CN}$ , 4,4-di-tbu-biphenyl<br>(2 equiv). blue LEDs, 16h          | No conversion    |

### 2.3. [2+2] cycloadditions dimerization of piperine mediated by Ru(bpy)<sub>3</sub>Cl<sub>2</sub>

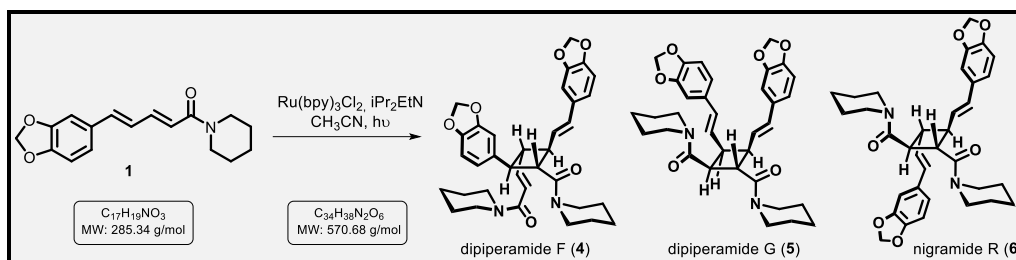

A solution of piperine (**1**) (30 mg, 0.105 mmol, 1.0 equiv), Ru(bpy)<sub>3</sub>Cl<sub>2</sub> (3.8 mg, 0.005 mmol, 0.05 equiv) and *i*Pr<sub>2</sub>EtN (37  $\mu$ L, 0.212 mmol, 2.0 equiv) in CH<sub>3</sub>CN (1.0 mL) was prepared in a glass tube. Solution was irradiated in an Hepatochem® PhotoRedOx Box™ photoreactor with a blue LEDs light [Kessil®, PR160L, 456 nm, 50W, 100% intensity]. After 16 h of reaction 4 batches were combined and concentrated under reduced pressure. Purification by preparative TLC on silica gel (eluent: CH<sub>2</sub>Cl<sub>2</sub>/MeOH, 99:1) afforded nigramide R (**6**) as white solid (R<sub>f</sub> = 0.39, 54 mg, 45 %), dipiperamide G (**5**) as white solid (R<sub>f</sub> = 0.26, 31 mg, 26 %) and dipiperamide F (**4**) as white solid (R<sub>f</sub> = 0.19, 8 mg, 7 %).

### 2.4. [4+2] cycloadditions dimerization of piperine mediated by Ru(bpy)<sub>3</sub>Cl<sub>2</sub>

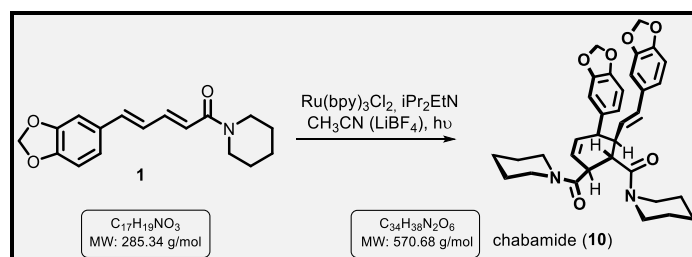

A solution of piperine (**1**) (30 mg, 0.105 mmol, 1.0 equiv), Ru(bpy)<sub>3</sub>Cl<sub>2</sub> (3.8 mg, 0.005 mmol, 0.05 equiv) and *i*Pr<sub>2</sub>EtN (37  $\mu$ L, 0.212 mmol, 2.0 equiv) in CH<sub>3</sub>CN (1.0 mL) was prepared in a glass hemolysis tube. A solution of LiBF<sub>4</sub> in CH<sub>3</sub>CN (1.0 M, 420  $\mu$ L, 0.420 mmol, 4.0 equiv) was added. Solution was irradiated in an Hepatochem® PhotoRedOx Box™ photoreactor with a blue LEDs light [Kessil®, PR160L, 456 nm, 50W, 100% intensity]. Then, the reaction mixture was concentrated under reduced pressure. Purification by preparative TLC on silica gel (eluent: CH<sub>2</sub>Cl<sub>2</sub>/MeOH, 199:1) afforded chabamide (**10**) as a white solid (R<sub>f</sub> = 0.37, 10 mg, 33 %) and dipiperamide F (**4**) as white solid (R<sub>f</sub> = 0.19, 5 mg, 17 %).

## 2.5. Dipiperamide F (4)

Consistent with the literature description.<sup>1</sup>

- **R<sub>f</sub>** = 0.19 (CH<sub>2</sub>Cl<sub>2</sub>/MeOH, 99:1);
- **<sup>1</sup>H NMR** (400 MHz, chloroform-d) δ: 6.95 (dd, *J* = 15.2, 6.6 Hz, 1H), 6.89 (d, *J* = 1.5 Hz, 1H), 6.79 – 6.69 (m, 5H), 6.40 (d, *J* = 15.7 Hz, 1H), 6.28 (dd, *J* = 15.2, 1.3 Hz, 1H), 6.09 (dd, *J* = 15.7, 7.4 Hz, 1H), 5.95 (s, 2H), 5.93 (s, 2H), 3.66 – 3.38 (m, 7H), 3.26 (m, 1H), 3.16 (m, 1H), 3.12 (m, 1H), 3.09 (m, 1H), 2.94 (q, *J* = 8.6 Hz, 1H), 1.69 – 1.59 (m, 4H), 1.58 – 1.16 (m, 8H);
- **<sup>13</sup>C{<sup>1</sup>H} NMR ppm** (101 MHz, chloroform-d): δ 169.9, 165.1, 148.1, 147.9, 147.2, 146.4, 145.1, 135.7, 131.3, 131.1, 128.4, 120.9, 120.3, 120.2, 108.33, 108.27, 107.3, 105.5, 101.1, 101.0, 48.9, 48.1, 46.9, 46.6, 45.6, 45.0, 43.4 (2C), 26.9 (2C), 26.8 (2C), 24.6, 24.4;
- **IR** (neat)  $\nu$  = 2919, 2852, 1651, 1606, 1504, 1489, 1443, 1250, 1038 cm<sup>-1</sup>;
- **HRMS(ESI)**: *m/z* calcd. for C<sub>34</sub>H<sub>39</sub>N<sub>2</sub>O<sub>6</sub><sup>+</sup> [M + H]<sup>+</sup> 571.2803; found 571.28075.

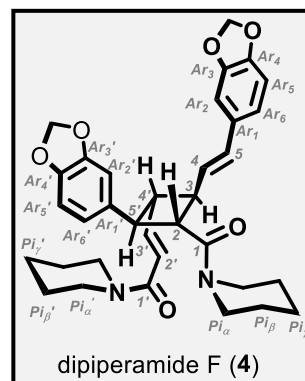

<sup>1</sup> R. Muharini, Z. Liu, W. Lin, P. Proksch, *Tetrahedron Lett.* **2015**, 56, 2521–2525.

**Table S2:** Comparison of the <sup>1</sup>H NMR and <sup>13</sup>C NMR data of synthetic and natural dipiperamide F in chloroform-*d*.

| Attribution                  | synthetic              |                       |      | natural                |                       |                         | Δ <sup>1</sup> H | synthetic               |                   | natural |  |
|------------------------------|------------------------|-----------------------|------|------------------------|-----------------------|-------------------------|------------------|-------------------------|-------------------|---------|--|
|                              | <sup>1</sup> H δ (ppm) | m, J (Hz)             | int. | <sup>1</sup> H δ (ppm) | m, J (Hz)             | <sup>13</sup> C δ (ppm) |                  | <sup>13</sup> C δ (ppm) | Δ <sup>13</sup> C |         |  |
| <b>1</b>                     | -                      | -                     | -    | -                      | -                     | -                       | 169.9            | 169.9                   | 0.0               |         |  |
| <b>2</b>                     | 3.09                   | m                     | 1    | 3.09                   | m                     | 0.00                    | 48.9             | 44.3                    | -4.6              |         |  |
| <b>3</b>                     | 3.12                   | m                     | 1    | 3.12                   | m                     | 0.00                    | 45.0             | 44.8                    | -0.2              |         |  |
| <b>4</b>                     | 6.09                   | dd (J = 15.7, 7.4 Hz) | 1    | 6.09                   | dd (J = 15.7, 7.6 Hz) | 0.00                    | 128.4            | 127.8                   | -0.6              |         |  |
| <b>5</b>                     | 6.40                   | d (J = 15.7 Hz)       | 1    | 6.40                   | d (J = 15.7 Hz)       | 0.00                    | 131.0            | 130.8                   | -0.2              |         |  |
| <b>Ar<sub>1</sub></b>        | -                      | -                     | -    | -                      | -                     | -                       | 131.3            | 131.4                   | 0.1               |         |  |
| <b>Ar<sub>2</sub></b>        | 6.89                   | d (J = 1.5 Hz)        | 1    | 6.89                   | d (J = 1.3 Hz)        | 0.00                    | 105.5            | 105.0                   | -0.5              |         |  |
| <b>Ar<sub>3</sub></b>        | -                      | -                     | -    | -                      | -                     | -                       | 147.9            | 147.6                   | -0.3              |         |  |
| <b>Ar<sub>4</sub></b>        | -                      | -                     | -    | -                      | -                     | -                       | 146.4            | 146.6                   | 0.2               |         |  |
| <b>Ar<sub>5</sub></b>        | 6.79 – 6.69            | m                     | 1    | 6.72                   | d (J = 8.9 Hz)        | -                       | 108.3            | 107.9                   | -0.4              |         |  |
| <b>Ar<sub>6</sub></b>        | 6.79 – 6.69            | m                     | 1    | 6.75                   | dd (J = 8.9, 1.3 Hz)  | -                       | 120.9            | 119.9                   | -1.0              |         |  |
| <b>[O-CH<sub>2</sub>-O]</b>  | 5.93*                  | s                     | 2    | 5.91                   | s                     | -0.02                   | 101.0*           | 100.9                   | -0.1              |         |  |
| <b>1'</b>                    | -                      | -                     | -    | -                      | -                     | -                       | 165.1            |                         |                   |         |  |
| <b>2'</b>                    | 6.28                   | dd (J = 15.2, 1.3 Hz) | 1    | 6.29                   | dd (J = 15.1, 1.3 Hz) | 0.01                    | 120.3            | 120.0                   | 0.3               |         |  |
| <b>3'</b>                    | 6.95                   | dd (J = 15.2, 6.6 Hz) | 1    | 6.94                   | dd (J = 15.1, 6.6 Hz) | -0.01                   | 145.1            | 144.3                   | -0.8              |         |  |
| <b>4'</b>                    | 2.94                   | q (J = 8.6 Hz)        | 1    | 2.94                   | q (J = 8.3 Hz)        | 0.00                    | 48.0             | 47.3                    | -0.7              |         |  |
| <b>5'</b>                    | 3.59                   | m                     | 1    | 3.59                   | m                     | 0.00                    | 45.6             | 45.2                    | -0.4              |         |  |
| <b>Ar<sub>1</sub>'</b>       | -                      | -                     | -    | -                      | -                     | -                       | 135.7            | 135.0                   | -0.3              |         |  |
| <b>Ar<sub>2</sub>'</b>       | 6.79 – 6.69            | m                     | 1    | 6.78                   | d (J = 1.3 Hz)        | -                       | 107.3            | 106.9                   | -0.4              |         |  |
| <b>Ar<sub>3</sub>'</b>       | -                      | -                     | -    | -                      | -                     | -                       | 148.0            | 147.6                   | -0.4              |         |  |
| <b>Ar<sub>4</sub>'</b>       | -                      | -                     | -    | -                      | -                     | -                       | 147.2            | 147.0                   | -0.2              |         |  |
| <b>Ar<sub>5</sub>'</b>       | 6.79 – 6.69            | m                     | 1    | 6.72                   | d (J = 8.2 Hz)        | -                       | 108.3            | 108.0                   | -0.3              |         |  |
| <b>Ar<sub>6</sub>'</b>       | 6.79 – 6.69            | m                     | 1    | 6.75                   | dd (J = 8.2, 1.3 Hz)  | -                       | 120.1            | 120.6                   | -0.5              |         |  |
| <b>[O-CH<sub>2</sub>-O]'</b> | 5.95*                  | s                     | 2    | 5.93                   | s                     | -0.02                   | 101.1*           | 100.9                   | -0.2              |         |  |
| <b>PI<sub>a</sub></b>        | 3.54 – 3.16            | m                     | 4    | 3.60                   | m                     | -                       | 43.3             | 43.1                    | -0.2              |         |  |
|                              |                        |                       |      | 3.43                   | m                     | -                       |                  |                         |                   |         |  |
|                              |                        |                       |      | 3.22                   | m                     | -                       | 46.9             | 46.8                    | 0.2               |         |  |
|                              |                        |                       |      | 3.12                   | m                     | -                       |                  |                         |                   |         |  |
| <b>PI<sub>b</sub></b>        | 1.58 – 1.16            | m                     | 4    | 1.50                   | m                     | -                       | 26.8*            | 25.2                    | -0.6              |         |  |
|                              |                        |                       |      | 1.23                   | m                     | -                       |                  | 25.2                    |                   |         |  |
| <b>PI<sub>v</sub></b>        | 1.58 – 1.16            | m                     | 2    | 1.50                   | m                     | -                       | 24.6             | 24.5                    | 0.1               |         |  |
| <b>PI<sub>a</sub>'</b>       | 3.54 – 3.46            | m                     | 4    | 3.54                   | m                     | -                       | 43.3             | 42.7                    | -0.6              |         |  |
|                              |                        |                       |      | 3.40                   | m                     | -                       | 46.6             | 46.3                    | -0.3              |         |  |
| <b>PI<sub>b</sub>'</b>       | 1.58 – 1.16            | m                     | 4    | 1.50                   | m                     | -                       | 26.9*            | 25.9                    | -0.2              |         |  |
| <b>PI<sub>v</sub>'</b>       | 1.67 – 1.58            | m                     | 2    | 1.60                   | m                     | -                       | 24.4             | 24.7                    | -0.3              |         |  |

\*signals interchangeable

## 2.6. Dipiperamide G (5)

Consistent with the literature description.<sup>1</sup>

- **R<sub>f</sub>** = 0.26 (CH<sub>2</sub>Cl<sub>2</sub>/MeOH, 99:1);
- **<sup>1</sup>H NMR** (400 MHz, chloroform-d) δ: 6.88 (d, *J* = 1.5 Hz, 1H), 6.80 (s, 1H), 6.76 – 6.67 (m, 4H), 6.39 – 6.28 (m, 2H), 6.20 (dd, *J* = 15.0, 8.2 Hz, 1H), 6.04 (dt, *J* = 14.9, 7.5 Hz, 1H), 5.93 (d, *J* = 1.1 Hz, 2H), 5.91 (q, *J* = 1.4 Hz, 2H), 4.21 (m, 1H), 3.91 (m, 1H), 3.81 – 3.33 (m, 9H), 3.23 (m, 1H), 1.70 – 1.40 (m, 12H);
- **<sup>13</sup>C{<sup>1</sup>H} NMR ppm** (101 MHz, chloroform-d): δ 171.0, 169.0, 148.0, 147.9, 147.1, 147.0, 133.2, 131.6, 131.5, 131.4, 127.1, 124.9, 120.8, 120.7, 108.2 (2C), 105.8, 105.6, 101.0, 100.9, 46.9, 45.9, 44.7, 43.3, 42.7 (2C), 41.5, 40.9, 26.9, 26.2, 25.7, 25.6, 24.6, 24.4;
- **IR** (neat) *ν* = 2923, 2855, 1630, 1504, 1489, 1443, 1251, 1039 cm<sup>-1</sup>;
- **HRMS(ESI)**: *m/z* calcd. for C<sub>34</sub>H<sub>39</sub>N<sub>2</sub>O<sub>6</sub><sup>+</sup> [M + H]<sup>+</sup> 571.2803; found 571.2806.

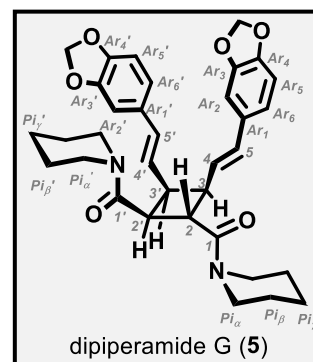

**Table S3:** Comparison of the  $^1\text{H}$  NMR and  $^{13}\text{C}$  NMR data of synthetic and natural dipiperamide G in chloroform- $d$ .

| Attribution             | synthetic                   |                       |      | natural                     |                        |       | $\Delta$ $^1\text{H}$ | synthetic                      |                                | natural                  |  |
|-------------------------|-----------------------------|-----------------------|------|-----------------------------|------------------------|-------|-----------------------|--------------------------------|--------------------------------|--------------------------|--|
|                         | $^1\text{H}$ $\delta$ (ppm) | m, J (Hz)             | int. | $^1\text{H}$ $\delta$ (ppm) | m, J (Hz)              |       |                       | $^{13}\text{C}$ $\delta$ (ppm) | $^{13}\text{C}$ $\delta$ (ppm) | $\Delta$ $^{13}\text{C}$ |  |
| 1                       | -                           | -                     | -    | -                           | -                      | -     | 171.0                 | 171.1                          | 0.1                            |                          |  |
| 2                       | 4.21                        | m                     | 1    | 4.18                        | t (J = 8.7 Hz)         | -0.03 | 40.9                  | 40.7                           | -0.2                           |                          |  |
| 3                       | 3.44                        | m                     | 1    | 3.44                        | m                      | 0.00  | 43.3                  | 43.4                           | 0.01                           |                          |  |
| 4                       | 6.04                        | dt (J = 14.9, 7.5 Hz) | 1    | 6.04                        | q (J = 15.5, 8.5 Hz)   | 0.00  | 127.1                 | 126.9                          | -0.2                           |                          |  |
| 5                       | 6.35 – 6.28                 | m                     | 1    | 6.31                        | d (J = 15.5 Hz)        |       | 131.6                 | 131.0                          | -0.6                           |                          |  |
| Ar <sub>1</sub>         | -                           | -                     | -    | -                           | -                      | -     | 131.4                 | 131.7                          | 0.3                            |                          |  |
| Ar <sub>2</sub>         | 6.80                        | s                     | 1    | 6.81                        | s                      | 0.01  | 105.6                 | 105.4                          | -0.2                           |                          |  |
| Ar <sub>3</sub>         | -                           | -                     | -    | -                           | -                      | -     | 147.0*                | 146.9                          | -0.1                           |                          |  |
| Ar <sub>4</sub>         | -                           | -                     | -    | -                           | -                      | -     | 147.9 <sup>#</sup>    | 147.3                          | -0.6                           |                          |  |
| Ar <sub>5</sub>         | 6.74 – 6.67                 |                       | 1    | 6.68                        | overlapped             | -     |                       | 108.0                          |                                |                          |  |
| Ar <sub>6</sub>         | 6.76 – 6.67                 |                       | 1    | 6.72                        | overlapped             | -     |                       | 120.6                          |                                |                          |  |
| [O-CH <sub>2</sub> -O]  | 5.93                        | d (J = 1.1 Hz)        | 2    | 5.93                        | m                      | 0.00  | 101.1                 | 101.0                          | -0.1                           |                          |  |
| 1'                      | -                           | -                     | -    | -                           | -                      | -     | 169.0                 | 168.8                          | -0.2                           |                          |  |
| 2'                      | 3.91                        | m                     | 1    | 3.88                        | t (J = 8.7 Hz)         | -0.03 | 41.5                  | 41.2                           | -0.3                           |                          |  |
| 3'                      | 3.50 – 3.43                 | m                     | 1    | 3.46                        | m                      | -     | 44.7                  | 44.4                           | -0.3                           |                          |  |
| 4'                      | 6.20                        | dd (J = 15.0, 8.2 Hz) |      | 6.20                        | dd (J = 15.5, 10.1 Hz) | 0.00  | 124.9                 | 124.7                          | -0.2                           |                          |  |
| 5'                      | 6.35 – 6.27                 | -                     | 1    | 6.29                        | d (J = 15.5 Hz)        | -     | 133.2                 | 133.0                          | -0.2                           |                          |  |
| Ar <sub>1</sub> '       | -                           | -                     | -    | -                           | -                      | -     |                       | 131.4                          |                                |                          |  |
| Ar <sub>2</sub> '       | 6.88                        | d (J = 1.5 Hz)        |      | 6.88                        | d (J = 1.3 Hz)         | 0.00  | 105.8                 | 105.6                          | -0.2                           |                          |  |
| Ar <sub>3</sub> '       | -                           | -                     | -    | -                           | -                      | -     | 147.1*                | 146.9                          | -0.2                           |                          |  |
| Ar <sub>4</sub> '       | -                           | -                     | -    | -                           | -                      | -     | 148.0 <sup>#</sup>    | 147.3                          | -0.7                           |                          |  |
| Ar <sub>5</sub> '       | 6.74 – 6.67                 |                       | 1    | 6.68                        | overlapped             | -     |                       | 108.0                          |                                |                          |  |
| Ar <sub>6</sub> '       | 6.76 – 6.67                 |                       | 1    | 6.72                        | overlapped             | -     |                       | 120.6                          |                                |                          |  |
| [O-CH <sub>2</sub> -O]' | 5.91                        | q (J = 1.4 Hz)        | 2    | 5.89                        | m                      | -0.02 | 101.0                 | 101.0                          | 0.0                            |                          |  |
| PI <sub>a</sub>         | 3.36 – 3.21                 | m                     | 2    | 3.30                        | m                      | -     | 45.9                  | 45.7                           | -0.2                           |                          |  |
|                         |                             |                       |      | 3.24                        | m                      | -     |                       |                                |                                |                          |  |
|                         | 3.52 – 3.39                 | m                     | 2    | 3.68                        | m                      | -     | 42.6                  | 43.1                           | 0.5                            |                          |  |
|                         |                             |                       |      | 3.37                        | m                      | -     |                       |                                |                                |                          |  |
| PI <sub>b</sub>         | 1.58 – 1.30                 | m                     | 2    | 1.46                        | m                      | -     | 26.9 <sup>§</sup>     | 26.4                           | -0.5                           |                          |  |
|                         | 1.58 – 1.30                 | m                     | 2    | 1.46                        | m                      | -     | 25.7 <sup>§</sup>     | 25.6                           | -0.1                           |                          |  |
| PI <sub>v</sub>         | 1.65 – 1.45                 | m                     | 2    | 1.54                        | m                      | -     | 24.4                  | 24.4                           | 0.0                            |                          |  |
| PI <sub>a</sub> '       | 3.52 – 3.39                 | m                     | 2    | 3.42                        | m                      | -     | 42.6                  | 43.0                           | -0.4                           |                          |  |
|                         | 3.66 – 3.46                 | m                     | 2    | 3.62                        | m                      | -     | 46.9                  | 46.6                           | -0.3                           |                          |  |
|                         |                             |                       |      | 3.48                        | m                      | -     |                       |                                |                                |                          |  |
| PI <sub>b</sub> '       | 1.58 – 1.30                 | m                     | 2    | 1.46                        | m                      | -     | 26.2 <sup>§</sup>     | 26.4                           | 0.2                            |                          |  |
|                         | 1.58 – 1.30                 | m                     | 2    | 1.54                        | m                      | -     | 25.6 <sup>§</sup>     | 25.6                           | 0.0                            |                          |  |
| PI <sub>v</sub> '       | 1.65 – 1.45                 | m                     | 2    | 1.62                        | m                      | -     | 24.6                  | 24.7                           | 0.1                            |                          |  |

\*#§ signals interchangeable



**Table S4:** Comparison of the <sup>1</sup>H NMR and <sup>13</sup>C NMR data of synthetic and natural nigramide R in chloroform-*d*.

| Attribution                 | synthetic                     |                                     |      | natural                       |                                     |                                | $\Delta$ <sup>1</sup> H | synthetic                      |                          | natural |  |
|-----------------------------|-------------------------------|-------------------------------------|------|-------------------------------|-------------------------------------|--------------------------------|-------------------------|--------------------------------|--------------------------|---------|--|
|                             | <sup>1</sup> H $\delta$ (ppm) | m, J (Hz)                           | int. | <sup>1</sup> H $\delta$ (ppm) | m, J (Hz)                           | <sup>13</sup> C $\delta$ (ppm) |                         | <sup>13</sup> C $\delta$ (ppm) | $\Delta$ <sup>13</sup> C |         |  |
| <b>1</b>                    | -                             | -                                   | -    | -                             | -                                   | -                              | -                       | 170.4                          | 170.4                    | 0.0     |  |
| <b>2</b>                    | 3.66                          | m                                   | 2    | 3.66                          | m                                   | 0.00                           | 42.1                    | 42.1                           | 0.0                      |         |  |
| <b>3</b>                    | 2.99                          | tt ( <i>J</i> = 5.6 – 2.6 Hz)       | 2    | 2.99                          | m                                   | 0.00                           | 46.2                    | 46.3                           | 0.1                      |         |  |
| <b>4</b>                    | 6.11                          | ddd ( <i>J</i> = 15.6, 6.0, 2.3 Hz) | 2    | 6.11                          | ddd ( <i>J</i> = 15.6, 8.3, 2.3 Hz) | 0.00                           | 128.6                   | 128.7                          | 0.1                      |         |  |
| <b>5</b>                    | 6.36                          | d ( <i>J</i> = 15.7 Hz)             | 2    | 6.36                          | d ( <i>J</i> = 15.8 Hz)             | 0.00                           | 131.1                   | 131.1                          | 0.0                      |         |  |
| <b>Ar<sub>1</sub></b>       | -                             | -                                   | -    | -                             | -                                   | -                              | 131.4                   | 131.4                          | 0.0                      |         |  |
| <b>Ar<sub>2</sub></b>       | 6.87                          | d ( <i>J</i> = 1.6 Hz)              | 2    | 6.87                          | d ( <i>J</i> = 1.6 Hz)              | 0.00                           | 105.6                   | 105.6                          | 0.0                      |         |  |
| <b>Ar<sub>3</sub></b>       | -                             | -                                   | -    | -                             | -                                   | -                              | 148.0                   | 148.0                          | 0.0                      |         |  |
| <b>Ar<sub>4</sub></b>       | -                             | -                                   | -    | -                             | -                                   | -                              | 147.1                   | 147.2                          | 0.1                      |         |  |
| <b>Ar<sub>5</sub></b>       | 6.72                          | d ( <i>J</i> = 8.0 Hz)              | 2    | 6.72                          | d ( <i>J</i> = 8.0 Hz)              | 0.00                           | 108.3                   | 108.3                          | 0.0                      |         |  |
| <b>Ar<sub>6</sub></b>       | 6.75                          | dd ( <i>J</i> = 8.0, 1.6 Hz)        | 2    | 6.75                          | dd ( <i>J</i> = 8.0, 1.6 Hz)        | 0.00                           | 120.9                   | 120.9                          | 0.0                      |         |  |
| <b>[O-CH<sub>2</sub>-O]</b> | 5.93                          | s                                   | 4    | 5.93                          | s                                   | 0.00                           | 101.0                   | 101.1                          | 0.0                      |         |  |
| <b>PI<sub>a</sub></b>       | 3.54 – 3.35                   | m                                   | 4    | 3.51                          | ddd ( <i>J</i> = 13.5, 6.7, 3.9 Hz) |                                | 47.6                    | 46.7                           | -0.9                     |         |  |
|                             |                               |                                     |      | 3.40                          | m                                   |                                |                         |                                |                          |         |  |
|                             | 3.72 – 3.64                   | m                                   | 2    | 3.68                          | ddd ( <i>J</i> = 13.1, 6.2, 4.2 Hz) |                                | 43.3                    | 43.3                           | 0.0                      |         |  |
|                             | 3.44 – 3.34                   | m                                   | 2    | 3.40                          | m                                   |                                |                         |                                |                          |         |  |
| <b>PI<sub>B</sub></b>       | 1.53 – 1.47                   | m                                   | 4    | 1.53                          | m                                   |                                | 26.8                    | 26.9                           | 0.1                      |         |  |
|                             | 1.47 – 1.36                   | m                                   | 4    | 1.44                          | m                                   |                                | 25.7                    | 25.7                           | 0.0                      |         |  |
| <b>PI<sub>y</sub></b>       | 1.65 – 1.52                   | m                                   | 4    | 1.59                          |                                     |                                | 24.5                    | 24.9                           | 0.4                      |         |  |

## 2.8. Chabamide (10)

Consistent with the literature description.<sup>3</sup>

- **R<sub>f</sub>** = 0.37 (CH<sub>2</sub>Cl<sub>2</sub>/MeOH, 99:1);
- **<sup>1</sup>H NMR** (400 MHz, chloroform-d) δ: 6.83 (s, 1H), 6.81 (s, 2H), 6.69 (d, *J* = 7.8 Hz, 1H), 6.66 – 6.61 (m, 2H), 6.33 (d, *J* = 15.7 Hz, 1H), 5.99 (d, *J* = 1.5 Hz, 1H), 5.96 (d, *J* = 1.5 Hz, 1H), 5.92 (s, 2H), 5.86 (ddd, *J* = 9.9, 4.9, 2.6 Hz, 1H), 5.75 (d, *J* = 9.9 Hz, 1H), 5.21 (dd, *J* = 15.6, 10.1 Hz, 1H), 4.18 (dd, *J* = 9.6, 2.5 Hz, 1H), 3.67 (dd, *J* = 11.8, 9.5 Hz, 1H), 3.57 (t, *J* = 5.5 Hz, 4H), 3.48 (t, *J* = 4.5 Hz, 1H), 3.43 – 3.23 (m, 4H), 2.97 (td, *J* = 10.9, 5.7 Hz, 1H), 1.73 – 1.38 (m, 12H);
- **<sup>13</sup>C{<sup>1</sup>H} NMR ppm** (101 MHz, chloroform-d): δ 172.4, 171.1, 147.8, 147.5, 146.8, 146.5, 133.6, 132.0, 131.2, 130.3, 128.0, 125.5, 123.5, 120.8, 110.8, 108.2, 107.9, 105.4, 101.0, 100.9, 47.1, 47.1, 46.0, 45.3, 43.4, 43.0, 42.9, 37.8, 26.7, 26.4, 25.8, 25.6, 24.6, 24.5;
- **IR** (neat) *ν* = 2919, 2852, 1633, 1504, 1488, 1443, 1251, 1039 cm<sup>-1</sup>;
- **HRMS(ESI)**: *m/z* calcd. for C<sub>34</sub>H<sub>39</sub>N<sub>2</sub>O<sub>6</sub><sup>+</sup> [M + H]<sup>+</sup> 571.2803; found 571.2805.

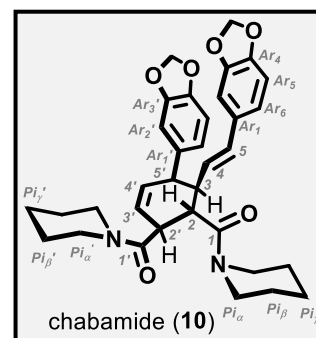

<sup>3</sup> T. Rukachaisirikul, S. Prabpai, P. Champung, A. Suksamrarn, *Planta Med.* **2002**, *68*, 853–855.

**Table S5:** Comparison of the  $^1\text{H}$  NMR and  $^{13}\text{C}$  NMR data of synthetic and natural chabamide in chloroform-*d*.

| Attribution             | synthetic                   |                                    |      | natural                     |                                      |       | $\Delta$ $^1\text{H}$ | synthetic                      |                                | natural                  |  |
|-------------------------|-----------------------------|------------------------------------|------|-----------------------------|--------------------------------------|-------|-----------------------|--------------------------------|--------------------------------|--------------------------|--|
|                         | $^1\text{H}$ $\delta$ (ppm) | <i>m</i> , <i>J</i> (Hz)           | int. | $^1\text{H}$ $\delta$ (ppm) | <i>m</i> , <i>J</i> (Hz)             |       |                       | $^{13}\text{C}$ $\delta$ (ppm) | $^{13}\text{C}$ $\delta$ (ppm) | $\Delta$ $^{13}\text{C}$ |  |
| 1                       | -                           | -                                  | -    | -                           | -                                    | -     | -                     | 172.4                          | 172.2                          | -0.2                     |  |
| 2                       | 3.67                        | dd ( <i>J</i> = 11.8, 9.5 Hz)      | 1    | 3.64                        | dd ( <i>J</i> = 11.8, 9.6 Hz)        | -0.03 | 37.8                  | 37.7                           | -0.1                           |                          |  |
| 3                       | 2.97                        | td ( <i>J</i> = 10.9, 5.7 Hz)      | 1    | 2.91                        | ddd ( <i>J</i> = 11.8, 10.2, 5.7 Hz) | -0.06 | 45.3                  | 45.4                           | 0.1                            |                          |  |
| 4                       | 5.21                        | dd ( <i>J</i> = 15.6, 10.1 Hz)     | 1    | 5.19                        | dd ( <i>J</i> = 15.6, 10.2 Hz)       | -0.02 | 128.0                 | 128.1                          | 0.01                           |                          |  |
| 5                       | 6.33                        | d ( <i>J</i> = 15.7 Hz)            | 1    | 6.29                        | d ( <i>J</i> = 15.9 Hz)              | -0.04 | 131.2                 | 131.0                          | -0.2                           |                          |  |
| Ar <sub>1</sub>         | -                           | -                                  | -    | -                           | -                                    | -     | 132.0                 | 131.9                          | -0.1                           |                          |  |
| Ar <sub>2</sub>         | 6.66 – 6.61                 | <i>m</i>                           | 1    | 6.60                        | d ( <i>J</i> = 1.6 Hz)               | -     | 105.4                 | 105.3                          | -0.1                           |                          |  |
| Ar <sub>3</sub>         | -                           | -                                  | -    | -                           | -                                    | -     | 147.8                 | 147.8                          | 0.0                            |                          |  |
| Ar <sub>4</sub>         | -                           | -                                  | -    | -                           | -                                    | -     | 146.8                 | 146.7                          | -0.1                           |                          |  |
| Ar <sub>5</sub>         | 6.69                        | d ( <i>J</i> = 7.8 Hz)             | 1    | 6.67                        | d ( <i>J</i> = 6.9 Hz)               | -0.02 | 108.2                 | 108.2                          | 0.0                            |                          |  |
| Ar <sub>6</sub>         | 6.66 – 6.64                 | <i>m</i>                           | 1    | 6.63                        | dd ( <i>J</i> = 6.9, 1.6 Hz)         | -     | 120.8                 | 120.7                          | -0.1                           |                          |  |
| [O-CH <sub>2</sub> -O]  | 5.92                        | <i>s</i>                           | 2    | 5.92                        | <i>s</i>                             | 0.00  | 100.9                 | 100.89                         | 0.1                            |                          |  |
| 1'                      | -                           | -                                  | -    | -                           | -                                    | -     | 171.1                 | 171.1                          | 0.0                            |                          |  |
| 2'                      | 4.18                        | dd ( <i>J</i> = 9.6, 2.5 Hz)       | 1    | 4.12                        | ddt ( <i>J</i> = 9.6, 2.3, 2.3 Hz)   | -0.06 | 42.9                  | 42.9                           | 0.0                            |                          |  |
| 3'                      | 5.75                        | d ( <i>J</i> = 9.9 Hz)             | 1    | 5.73                        | ddd ( <i>J</i> = 10.0, 2.3, 2.3 Hz)  | -0.02 | 125.5                 | 125.5                          | 0.02                           |                          |  |
| 4'                      | 5.86                        | ddd ( <i>J</i> = 9.9, 4.9, 2.6 Hz) | 1    | 5.84                        | ddd ( <i>J</i> = 10.0, 5.0, 2.3 Hz)  | -0.02 | 130.3                 | 130.3                          | 0.0                            |                          |  |
| 5'                      | 3.48                        | t ( <i>J</i> = 4.5 Hz)             | 1    | 3.45                        | <i>m</i>                             | -0.03 | 46.0                  | 45.9                           | -0.1                           |                          |  |
| Ar <sub>1</sub> '       | -                           | -                                  | -    | -                           | -                                    | -     | 133.6                 | 133.6                          | 0.0                            |                          |  |
| Ar <sub>2</sub> '       | 6.83                        | <i>s</i>                           | 1    | 6.79                        | <i>s</i>                             | -0.04 | 100.8                 | 100.8                          | 0.0                            |                          |  |
| Ar <sub>3</sub> '       | -                           | -                                  | -    | -                           | -                                    | -     | 147.5                 | 147.5                          |                                |                          |  |
| Ar <sub>4</sub> '       | -                           | -                                  | -    | -                           | -                                    | -     | 146.5                 | 146.4                          | -0.1                           |                          |  |
| Ar <sub>5</sub> '       | 6.81                        | <i>s</i>                           | 1    | 6.80                        | d ( <i>J</i> = 11.4 Hz)              | -0.01 | 108.0                 | 107.9                          | -0.1                           |                          |  |
| Ar <sub>6</sub> '       | 6.81                        | <i>s</i>                           | 1    | 6.80                        | d ( <i>J</i> = 11.4 Hz)              |       | 123.5                 | 123.5                          | 0.0                            |                          |  |
| [O-CH <sub>2</sub> -O]' | 5.99                        | d ( <i>J</i> = 1.5 Hz)             | 1    | 5.96                        | d ( <i>J</i> = 1.5 Hz)               | -0.03 | 101.0                 | 100.92                         | 0.1                            |                          |  |
|                         | 5.96                        | d ( <i>J</i> = 1.5 Hz)             | 1    | 5.94                        | d ( <i>J</i> = 1.5 Hz)               | -0.02 |                       |                                |                                |                          |  |
| PI <sub>a</sub>         | 3.59 – 3.52                 | <i>m</i>                           | 2    | 3.33                        | <i>m</i>                             | -     | 47.0                  | 46.9                           | -0.1                           |                          |  |
|                         | 3.42 – 3.24                 | <i>m</i>                           | 2    | 3.26                        | <i>m</i>                             | -     | 43.0                  | 42.8                           | -0.2                           |                          |  |
|                         |                             |                                    |      |                             | <i>m</i>                             | -     |                       |                                |                                |                          |  |
| PI <sub>b</sub>         | 1.70 – 1.10                 | <i>m</i>                           | 4    | 1.12                        | <i>m</i>                             | -     | 26.4                  | 26.4                           | 0.0                            |                          |  |
|                         |                             |                                    |      | 1.43                        | <i>m</i>                             | -     |                       |                                |                                |                          |  |
|                         |                             |                                    |      | 1.25                        | <i>m</i>                             | -     | 25.6                  | 25.6                           | 0.0                            |                          |  |
| PI <sub>y</sub>         | 1.50 – 1.35                 | <i>m</i>                           | 2    | 1.43                        | <i>m</i>                             | -     | 24.5                  | 24.5                           | 0.0                            |                          |  |
|                         |                             |                                    |      | 1.34                        | <i>m</i>                             | -     |                       |                                |                                |                          |  |
| PI <sub>a</sub> '       | 3.59 – 3.52                 | <i>m</i>                           | 2    | 3.54                        | <i>m</i>                             | -     | 47.1                  | 47.1                           | 0.0                            |                          |  |
|                         | 3.42 – 3.24                 | <i>m</i>                           | 2    |                             |                                      |       | 43.4                  | 43.3                           | -0.1                           |                          |  |
| PI <sub>b</sub> '       | 1.70 – 1.10                 | <i>m</i>                           | 4    | 1.58                        | <i>m</i>                             | -     | 26.7                  | 26.7                           | 0.0                            |                          |  |
|                         |                             |                                    |      | 1.51                        | <i>m</i>                             | -     | 25.8                  | 25.8                           | 0.0                            |                          |  |
| PI <sub>y</sub> '       | 1.70 – 1.60                 | <i>m</i>                           | 2    | 1.63                        | <i>m</i>                             | -     | 24.6                  | 24.6                           | 0.0                            |                          |  |

## 2.9. [4+2] cycloadditions dimerization of piperine mediated by Ir(ppy)<sub>3</sub>

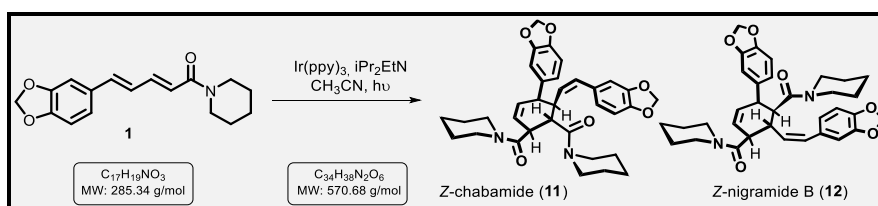

A solution of piperine (**1**) (33 mg, 0.11 mmol, 1.0 equiv), Ir(ppy)<sub>3</sub> (3.3 mg, 0.005 mmol, 0.05 equiv) and *i*Pr<sub>2</sub>EtN (37  $\mu$ L, 0.212 mmol, 2.0 equiv) in CH<sub>3</sub>CN (1.0 mL) was prepared in a glass tube. Solution was irradiated in an Hepatochem® PhotoRedOx Box™ photoreactor with a blue LEDs light [465 nM]. After 16 h of reaction 4 batches were combined and concentrated under reduced pressure. Purification by flash chromatography on silica gel (gradient of elution: CH<sub>2</sub>Cl<sub>2</sub>/EtOH = 99:1 then 98:2) and further preparative (TLC CH<sub>2</sub>Cl<sub>2</sub>/EtOH = 99:1) afforded Z-chabamide (**11**) as a white solid (R<sub>f</sub> = 0.43, 70 mg, 53%) and then Z-nigramide B (**12**) as a white solid (R<sub>f</sub> = 0.43, 16 mg, 12%).

### 2.10. Z-chabamide (11)

- R<sub>f</sub> = 0.43 (CH<sub>2</sub>Cl<sub>2</sub>/MeOH, 99:1);
- <sup>1</sup>H NMR (400 MHz, chloroform-d)  $\delta$ : 6.94 (d, *J* = 1.6 Hz, 1H), 6.88 – 6.84 (m, 2H), 6.81 (s, 1H), 6.80 (d, *J* = 6.0 Hz, 1H), 6.79 (d, *J* = 7.9 Hz, 1H), 6.29 (d, *J* = 11.7 Hz, 1H), 5.96 (d, *J* = 1.5 Hz, 1H), 5.95 (d, *J* = 1.5 Hz, 1H), 5.94 – 5.92 (m, 2H), 5.81 (ddd, *J* = 9.9, 5.0, 2.7 Hz, 1H), 5.69 (dt, *J* = 10.0, 1.8 Hz, 1H), 4.67 (dd, *J* = 11.7, 10.8 Hz, 1H), 4.09 (dq, *J* = 9.4, 2.4 Hz, 1H), 3.62 (dd, *J* = 11.5, 9.4 Hz, 1H), 3.58 – 3.46 (m, 6H), 3.45 – 3.26 (m, 4H), 1.71 – 1.60 (m, 2H), 1.60 – 1.44 (m, 12H), 1.44 – 1.37 (m, 2H).
- <sup>13</sup>C{<sup>1</sup>H} NMR ppm (101 MHz, chloroform-d):  $\delta$  172.4, 171.5, 147.6, 147.4, 146.5, 146.4, 133.5, 131.8, 131.5, 130.1, 125.8, 123.6, 122.5, 111.3, 109.2, 108.4, 108.0, 101.0, 100.9, 47.3, 47.3, 45.4, 43.5, 43.2, 42.9, 39.2, 37.4, 27.0, 26.6, 26.0, 26.0, 24.8 (2C).
- IR (neat)  $\nu$  = 2933, 2856, 1629, 1487, 1438, 1234, 1037 cm<sup>-1</sup>;
- HRMS(ESI): *m/z* calcd. for C<sub>34</sub>H<sub>39</sub>N<sub>2</sub>O<sub>6</sub><sup>+</sup> [M + H]<sup>+</sup> 571.2803; found 571.2808.

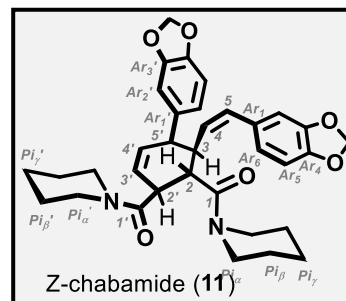

**Table S6:** <sup>1</sup>H NMR and <sup>13</sup>C NMR data of Z-chabamide in chloroform-*d*.

| Attribution                         | <sup>1</sup> H δ (ppm) | m   | J (Hz)             | int. | <sup>13</sup> C δ (ppm) |
|-------------------------------------|------------------------|-----|--------------------|------|-------------------------|
| 1                                   | -                      |     |                    |      | 172.4                   |
| 2                                   | 3.62                   | dd  | 11.5 – 9.4 Hz      | 1    | 39.2                    |
| 3                                   | 3.53 – 3.46            | m   |                    | 1    | 37.4                    |
| 4                                   | 4.67                   | dd  | 11.7 – 10.8 Hz     | 1    | 131.8                   |
| 5                                   | 6.29                   | d   | 11.7 Hz            | 1    | 130.1                   |
| Ar <sub>1</sub>                     | -                      |     |                    |      | 131.5                   |
| Ar <sub>2</sub>                     | 6.94                   | d   | 1.6 Hz             | 1    | 109.2                   |
| Ar <sub>3</sub>                     | -                      |     |                    |      | 147.6                   |
| Ar <sub>4</sub>                     | -                      |     |                    |      | 146.5                   |
| Ar <sub>5</sub>                     | 6.79                   | d   | 7.9 Hz             | 1    | 108.4                   |
| Ar <sub>6</sub>                     | 6.88 – 6.84            | m   |                    | 1    | 122.5                   |
| 1'                                  | -                      |     |                    |      | 171.5                   |
| 2'                                  | 4.09                   | dq  | 9.4 – 2.4 Hz       | 1    | 42.9                    |
| 3'                                  | 5.69                   | dt  | 10.0 – 1.8 Hz      | 1    | 125.8                   |
| 4'                                  | 5.81                   | ddd | 9.9 – 5.0 – 2.7 Hz | 1    | 131.8                   |
| 5'                                  | 3.37 – 3.32            | m   |                    | 1    | 45.4                    |
| Ar <sub>1</sub> '                   | -                      |     |                    |      | 133.5                   |
| Ar <sub>2</sub> '                   | 6.81                   | s   |                    | 1    | 112.3                   |
| Ar <sub>3</sub> '                   | -                      |     |                    |      | 147.4                   |
| Ar <sub>4</sub> '                   | -                      |     |                    |      | 146.5                   |
| Ar <sub>5</sub> '                   | 6.80                   | d   | 6.0 Hz             | 4    | 108.0                   |
| Ar <sub>6</sub> '                   | 6.88 – 6.84            | m   |                    | 1    | 123.6                   |
| [O-CH <sub>2</sub> -O]'             | 5.96                   | d   | 1.5 Hz             | 1    | 101.0 or 100.9          |
|                                     | 5.95                   | d   | 1.5 Hz             | 1    |                         |
| [O-CH <sub>2</sub> -O]              | 5.94 – 5.92            | m   |                    | 2    | 101.0 or 100.9          |
| PI <sub>α</sub> & PI <sub>α</sub> ' | 3.58 – 3.26            | m   |                    | 8    | 47.4                    |
|                                     |                        |     |                    |      | 47.3                    |
|                                     |                        |     |                    |      | 43.5                    |
|                                     |                        |     |                    |      | 43.2                    |
| PI <sub>β</sub> & PI <sub>β</sub> ' | 1.60 – 1.44            | m   |                    | 8    | 27.0                    |
|                                     |                        |     |                    |      | 26.6                    |
|                                     |                        |     |                    |      | 26.0                    |
|                                     |                        |     |                    |      | 25.9                    |
| PI <sub>γ</sub> & PI <sub>γ</sub> ' | 1.60 – 1.44            | m   |                    | 2    | 24.8                    |
|                                     | 1.44 – 1.37            | m   |                    | 2    |                         |

## 2.11. Z-nigramide B (12)

- $R_f = 0.40$  ( $\text{CH}_2\text{Cl}_2/\text{MeOH}$ , 99:1);
- $^1\text{H NMR}$  (400 MHz, chloroform-d)  $\delta$ : 6.82 – 6.75 (m, 4H), 6.75 – 6.69 (m, 2H), 6.55 (d,  $J = 11.4$  Hz, 1H), 5.94 (d,  $J = 1.4$  Hz, 1H), 5.93 (d,  $J = 1.4$  Hz, 1H), 5.92 (d,  $J = 1.4$  Hz, 1H), 5.90 (d,  $J = 1.4$  Hz, 1H), 5.87 – 5.76 (m, 3H), 4.20 (dq,  $J = 10.0, 2.1$  Hz, 1H), 3.80 – 3.57 (m, 3H), 3.54 (dd,  $J = 10.0, 3.0$  Hz, 1H), 3.55 – 3.44 (m, 1H), 3.38 (m, 1H), 3.36 – 3.32 (m, 1H), 3.21 – 3.12 (m, 1H), 3.05 (d,  $J = 11.2$  Hz, 1H), 2.65 (ddd,  $J = 12.0, 8.3, 3.5$  Hz, 1H), 2.53 (ddd,  $J = 13.4, 6.7, 3.5$  Hz, 1H), 1.84 – 1.72 (m, 1H), 1.70 – 1.23 (m, 8H), 1.21 – 1.11 (m, 2H), 0.85 – 0.70 (m, 1H).
- $^{13}\text{C}\{^1\text{H}\}$  NMR ppm (101 MHz, chloroform-d):  $\delta$  171.2, 171.1, 147.9, 147.7, 146.5, 146.4, 136.6, 131.8, 131.5, 130.9, 128.0, 127.0, 122.1, 121.8, 109.2, 109.1, 108.3, 108.2, 101.2, 101.1, 47.1, 47.0, 45.8, 43.8, 42.8, 40.8, 38.0, 37.2, 26.9, 25.8, 25.8, 25.3, 24.9, 24.6.
- IR (neat)  $\nu = 2933, 2856, 1637, 1487, 1438, 1247, 1037$   $\text{cm}^{-1}$ ;
- HRMS(ESI):  $m/z$  calcd. for  $\text{C}_{34}\text{H}_{39}\text{N}_2\text{O}_6^+$   $[\text{M} + \text{H}]^+$  571.2803; found 571.2807.

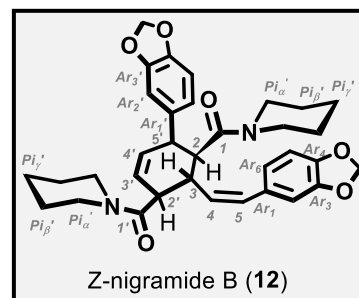

**Table S7:** <sup>1</sup>H NMR and <sup>13</sup>C NMR data of Z-nigamide B in chloroform-*d*.

| Attribution                         | <sup>1</sup> H δ (ppm) | m   | J (Hz)              | int. | <sup>13</sup> C δ (ppm) |
|-------------------------------------|------------------------|-----|---------------------|------|-------------------------|
| 1                                   | -                      |     |                     |      | 171.1 or 171.2          |
| 2                                   | 4.20                   | dq  | 10.0 – 2.1 Hz       | 1    | 38.0                    |
| 3                                   | 3.54                   | dd  | 10.0 – 3.0 Hz       | 1    | 37.2                    |
| 4                                   | 5.84 – 5.77            | m   |                     | 1    | 131.5                   |
| 5                                   | 6.55                   | d   | 11.4 Hz             | 1    | 130.9                   |
| Ar <sub>1</sub>                     | -                      |     |                     |      | 131.8                   |
| Ar <sub>2</sub>                     | 6.72 – 6.70            | m   |                     | 1    | 109.2                   |
| Ar <sub>3</sub>                     | -                      |     |                     |      | 147.7 or 147.9          |
| Ar <sub>4</sub>                     | -                      |     |                     |      | 146.5 or 146.6          |
| Ar <sub>5</sub>                     | 6.80 – 6.77            | m   |                     | 1    | 108.3                   |
| Ar <sub>6</sub>                     | 6.72 – 6.69            | m   |                     | 1    | 122.1                   |
| 1'                                  | -                      |     |                     |      | 171.1 or 171.2          |
| 2'                                  | 3.05                   | d   | 11.2 Hz             | 1    | 40.8                    |
| 3'                                  | 5.85 – 5.78            | m   |                     | 1    | 128.0                   |
| 4'                                  | 5.87 – 5.83            | m   |                     | 1    | 127.0                   |
| 5'                                  | 3.38                   | m   |                     | 1    | 47.0                    |
| Ar <sub>1</sub> '                   | -                      |     |                     |      | 136.6                   |
| Ar <sub>2</sub> '                   | 6.80 – 6.78            | m   |                     | 1    | 109.1                   |
| Ar <sub>3</sub> '                   | -                      |     |                     |      | 147.7 or 147.9          |
| Ar <sub>4</sub> '                   | -                      |     |                     |      | 146.5 or 146.6          |
| Ar <sub>5</sub> '                   | 6.75 – 6.80            | m   |                     | 1    | 108.2                   |
| Ar <sub>6</sub> '                   | 6.76 – 8.82            | m   |                     | 1    | 121.8                   |
| [O-CH <sub>2</sub> -O] <sup>1</sup> | 5.94                   | d   | 1.4 Hz              | 1    | 101.1 and 101.2         |
|                                     | 5.93                   | d   | 1.4 Hz              | 1    |                         |
|                                     | 5.92                   | d   | 1.4 Hz              | 1    |                         |
|                                     | 5.90                   | d   | 1.4 Hz              | 1    |                         |
| PI <sub>α</sub> & PI <sub>α</sub> ' | 3.77 – 3.61            | m   |                     | 2    | 47.1                    |
|                                     | 2.65                   | ddd | 12.0 – 8.3 – 3.5 Hz | 1    | 45.8                    |
|                                     | 2.53                   | ddd | 13.4 – 6.7 – 3.5 Hz | 1    |                         |
|                                     | 3.73 – 3.60            | m   |                     | 1    | 43.8                    |
|                                     | 3.55 – 3.44            | m   |                     | 1    |                         |
|                                     | 3.36 – 3.32            | m   |                     | 1    | 42.8                    |
|                                     | 3.21 – 3.12            | m   |                     | 1    |                         |
| PI <sub>β</sub> & PI <sub>β</sub> ' | 1.84 – 1.72            | m   |                     | 1    | 26.9                    |
|                                     | 1.67 – 1.58            | m   |                     | 1    |                         |
|                                     | 1.65 – 1.40            | m   |                     | 3    | 25.8 and 25.7           |
|                                     | 1.21 – 1.11            | m   |                     | 1    |                         |
|                                     | 1.21 – 1.11            | m   |                     | 1    | 25.3                    |
|                                     | 0.85 – 0.70            | m   |                     | 1    |                         |
| PI <sub>γ</sub> & PI <sub>γ</sub> ' | 1.70 – 1.29            | m   |                     | 4    | 24.9 and 24.6           |

### 3. Synthesis of ilepcimide and piperettine

#### 3.1. 1-(Chloracetyl)-piperidine (si-1)

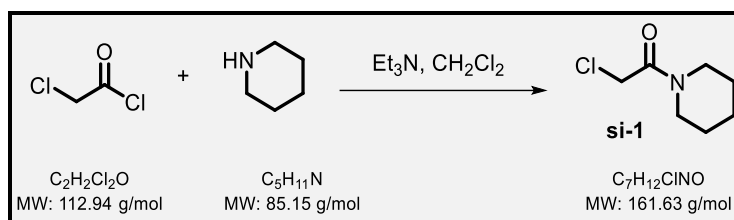

Prepared by adapting the literature procedure.<sup>4</sup> To a solution of piperidine (2.35 mL, 23.8 mmol, 1.0 equiv) and  $\text{Et}_3\text{N}$  (9.25 mL, 66.4 mmol, 2.8 equiv) in  $\text{CH}_2\text{Cl}_2$  (60 mL), chloroacetyl chloride (2.10 mL, 26.5 mmol, 1.1 equiv) was added dropwise. After 90 min of stirring, the reaction mixture was quenched with HCl (2M, 50 mL). The organic layer was separated, washed with an aqueous solution of  $\text{K}_2\text{CO}_3$  (5%, 2 x 40 mL) and then  $\text{H}_2\text{O}$  (50 mL), dried over  $\text{Na}_2\text{SO}_4$  and concentrated under reduced pressure to afford **si-1** as a brown oil (1.85 g, 48%).

- $R_f = 0.18$  ( $\text{CH}_2\text{Cl}_2$ );
- $^1\text{H NMR}$  (300 MHz, chloroform-d)  $\delta$ : 4.05 (s, 2H), 3.55 (t,  $J = 5.5$  Hz, 2H), 3.43 (t,  $J = 5.0$  Hz, 2H), 1.73 – 1.51 (m, 8H);
- $^{13}\text{C}\{^1\text{H}\}$  NMR ppm (75 MHz, chloroform-d):  $\delta$  161.2, 47.6, 43.5, 41.3, 26.5, 25.5, 24.4;
- IR (neat)  $\nu = 2940, 1641, 1444, 1280, 1250, 1224, 1135, 1120, 1024$   $\text{cm}^{-1}$ ;
- HRMS(ESI):  $m/z$  calcd. for  $\text{C}_7\text{H}_{12}\text{NO}_2^{35}\text{ClNa}^+$  [ $\text{M} + \text{Na}$ ] $^+$  184.0500; found 184.0473.

#### 3.2. Diethyl (2-oxo-2-(piperidin-1-yl)-ethyl)-phosphonate (15)

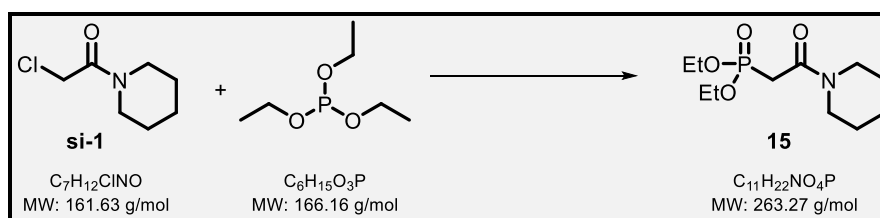

Prepared by adapting the literature procedure.<sup>5</sup> A mixture of chloroacetyl piperidine **si-1** (1.85 g, 11.5 mmol, 1.0 equiv) and  $\text{P}(\text{OEt})_3$  (2.5 mL, 14.6 mmol, 1.3 equiv) was

<sup>4</sup> A. Ohta, Y. Tomomura, J. Sawaki, H. Akkike, M. Ikuta, M. Shimazaki, *Heterocycles*. **1991**, 32, 965–973.

<sup>5</sup> J. K. Mannisto, A. Sahari, K. Lagerblom, T. Niemi, M. Nieger, G. Sztanó, T. Repo, *Chem. – Eur. J.* **2019**, 25, 10284–10289.

heated to 150°C for 2.5 h. After cooling, purification by flash chromatography on silica gel (gradient of elution: CH<sub>2</sub>Cl<sub>2</sub>/Et<sub>2</sub>O = 199:1 then 98:2) afforded **15** as a pale-yellow oil (2.35 g, 79%).

- **R<sub>f</sub>** = 0.15 (CH<sub>2</sub>Cl<sub>2</sub>);
- **<sup>1</sup>H NMR** (300 MHz, chloroform-*d*) δ: 4.16 (tt<sub>app</sub>, *J* = 8.2, 6.5 Hz, 4H), 3.52 (s br, 4H), 3.06 (d, *J* = 22.0, 2H), 1.74 – 1.50 (m, 6H), 1.47 – 1.17 (m, 5H);
- **<sup>13</sup>C{<sup>1</sup>H} NMR ppm** (75 MHz, chloroform-*d*): δ 163.2, 62.7, 62.7, 48.2, 43.3, 33.5 (d, *J* = 133.3 Hz), 26.5, 25.7, 24.5, 16.5, 16.4;
- **IR** (neat) *ν* = 3400 large, 298, 2939, 2858, 1622, 1444, 1274, 1054, 974 cm<sup>-1</sup>;
- **HRMS(ESI)**: *m/z* calcd. for C<sub>11</sub>H<sub>22</sub>NO<sub>4</sub>PNa<sup>+</sup> [M + Na]<sup>+</sup> 286.1179; found 286.1165.

### 3.3. Ilepcimide (**2**)

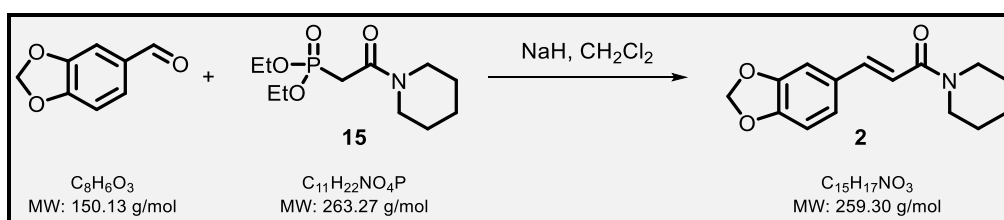

To a solution of piperonal (300 mg, 2.0 mmol, 1.0 equiv) and **15** (600 mg, 2.3 mmol, 1.14 equiv) in CH<sub>2</sub>Cl<sub>2</sub> (20 mL), NaH (60%, 160 mg, 4.0 mmol, 2.0 equiv) was added. After 12 h of stirrings, the reaction mixture was quenched with H<sub>2</sub>O (5 mL). The organic layer was separated, dried over Na<sub>2</sub>SO<sub>4</sub> and concentrated under reduced pressure. Purification by flash chromatography on silica gel (eluent: CH<sub>2</sub>Cl<sub>2</sub>/Et<sub>2</sub>O = 99:1) afforded **2** as an off-white solid (500 mg, 96%). Consistent with the literature description.<sup>6</sup>

- **R<sub>f</sub>** = 0.15 (CH<sub>2</sub>Cl<sub>2</sub>);
- Aniseed scent
- **<sup>1</sup>H NMR** (300 MHz, chloroform-*d*) δ: 7.55 (d, *J* = 15.4 Hz, 1H), 7.02 (s, 1H), 6.98 (d, *J* = 7.7 Hz, 1H), 6.78 (d, *J* = 7.7 Hz, 1H), 6.72 (d, *J* = 15.4 Hz, 1H), 5.97 (s, 1H), 5.97 (s, 1H), 3.60 (t, *J* = 5.3 Hz, 4H), 1.77 – 1.51 (m, 6H);
- **<sup>13</sup>C{<sup>1</sup>H} NMR ppm** (75 MHz, chloroform-*d*): δ 165.6, 149.0, 148.3, 142.1, 130.1, 123.7, 115.8, 108.6, 106.5, 101.5, 45.3 (2C), 26.3 (2C), 24.8;

<sup>6</sup> X. Xia, P. H. Toy, *Synlett* **2015**, 26, 1737–1743.

- **IR** (neat)  $\nu = 2937, 2854, 1642, 1606, 1504, 1489, 1444, 1354, 1248, 1215, 1140, 1122, 1101, 1037 \text{ cm}^{-1}$ ;
- **HRMS(ESI)**:  $m/z$  calcd. for  $\text{C}_{15}\text{H}_{18}\text{NO}_3^+ [\text{M} + \text{H}]^+$  260.1282; found 260.1293.

### 3.4. Methyl piperate (**13**)

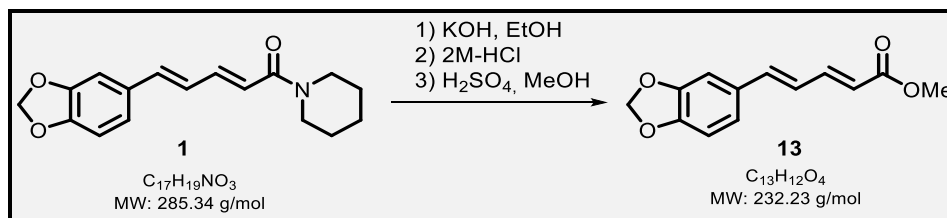

Prepared by adapting literature procedure.<sup>7</sup> A solution of piperine (**1**) (3.0 g, 10.5 mmol, 1.0 equiv) and KOH (6.8 g, 119.3 mmol, 11.4 equiv) in EtOH (25 mL) was heated to reflux for 16h. After cooling, the precipitate was collected by filtration and then dissolved in  $\text{H}_2\text{O}$  (20 mL). The solution was acidified with HCl (2M, pH = 2-3). Precipitate was collected by filtration and washed with  $\text{H}_2\text{O}$  (2 x 5 mL) to afford crude piperic acid. To crude piperic acid suspended in MeOH (40.0 mL) conc- $\text{H}_2\text{SO}_4$  (5 drops) was added. The reaction mixture was heated to reflux for 16 h. After cooling, the reaction mixture was concentrated under reduced pressure. Crude product was dissolved in  $\text{CH}_2\text{Cl}_2$  (40 mL), washed with a saturated aqueous solution of  $\text{NaHCO}_3$  (2 x 20 mL), dried over  $\text{Na}_2\text{SO}_4$  and concentrated under reduced pressure. Purification by flash chromatography on silica gel (eluent:  $\text{CH}_2\text{Cl}_2$ ) afforded **13** as a yellow solid (1.29 g, 53%).

- **R<sub>f</sub>** = 0.78 ( $\text{CH}_2\text{Cl}_2$ );
- **<sup>1</sup>H NMR** (300 MHz, chloroform-d)  $\delta$ : 7.42 (dd,  $J = 15.2, 10.4 \text{ Hz}$ , 1H), 6.99 (d,  $J = 1.7 \text{ Hz}$ , 1H), 6.91 (dd,  $J = 8.0, 1.7 \text{ Hz}$ , 1H), 6.86 – 6.64 (m, 3H), 5.98 (s, 3H), 5.94 (d,  $J = 15.0 \text{ Hz}$ , 1H), 3.76 (s, 3H);
- **<sup>13</sup>C{<sup>1</sup>H} NMR ppm** (101 MHz, chloroform-d):  $\delta$  167.7, 148.7, 148.5, 145.1, 140.4, 130.7, 124.7, 123.1, 120.1, 108.7, 106.1, 101.5, 51.6;
- **IR** (neat)  $\nu = 2949, 2918, 2849, 1707, 1620, 1606, 1505, 1493, 1452, 1436, 1331, 1311, 1265, 1241, 1141, 1039, 1001 \text{ cm}^{-1}$ ;
- **HRMS(ESI)**:  $m/z$  calcd. for  $\text{C}_{13}\text{H}_{13}\text{O}_4^+ [\text{M} + \text{H}]^+$  233.0808; found 233.0819.

<sup>7</sup> H. Qu, X. Yu, X. Zhi, M. Lv, H. Xu, *Bioorg. Med. Chem. Lett.* **2013**, 23, 5552–5557.

### 3.5. (E,E)-5-(1,2-methylenedioxy-benzen-4-yl)-penta-2,4-dien-1-ol (si-2)

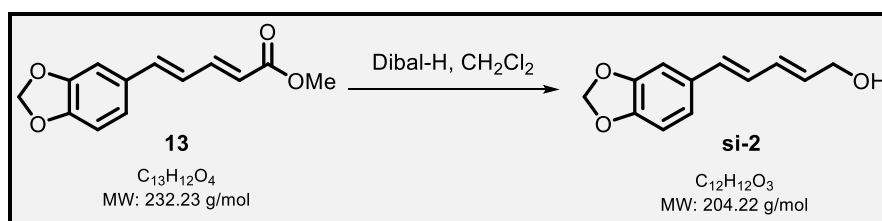

Prepared by adapting literature procedure.<sup>7</sup> To a solution of **13** (410 mg, 1.76 mmol, 1.0 equiv) in CH<sub>2</sub>Cl<sub>2</sub> (25 mL) a solution of Dibal-H (1.1 M, 6.0 mL, 6.60 mmol, 3.75 equiv) in cyclohexane was added. After 4h of stirring at 0°C, the reaction mixture was quenched with H<sub>2</sub>O (15 mL). The organic layer was separated, washed with H<sub>2</sub>O (5 mL), dried over Na<sub>2</sub>SO<sub>4</sub> and concentrated under reduced pressure. Purification by flash chromatography on silica gel (gradient of elution: CH<sub>2</sub>Cl<sub>2</sub>/EtOH = 99:2 then 95:5) afforded **si-2** as a pale yellow solid (320 mg, 88%).

- **R<sub>f</sub>** = 0.20 (CH<sub>2</sub>Cl<sub>2</sub>);
- **<sup>1</sup>H NMR** (300 MHz, chloroform-d) δ: 6.94 (s, 1H), 6.83 (d, *J* = 7.9 Hz, 1H), 6.75 (d, *J* = 8.0 Hz, 1H), 6.62 (dd, *J* = 15.5, 10.3 Hz, 1H), 6.46 (d, *J* = 15.6 Hz, 1H), 6.39 (m, 1H), 5.95 (s, 2H), 5.90 (dt, *J* = 9.6, 6.2 Hz, 1H), 4.23 (d, *J* = 5.9 Hz, 2H);
- **<sup>13</sup>C{<sup>1</sup>H} NMR ppm** (75 MHz, chloroform-d): δ 148.1, 147.3, 146.5, 132.5, 131.8, 131.7, 126.5, 121.3, 108.4, 105.5, 101.1, 63.5;
- **IR** (neat)  $\nu$  = 3340 large, 2921, 2851, 1503, 1488, 1446, 1355, 1250, 1192, 1094, 1038, 985 cm<sup>-1</sup>;
- **HRMS(ESI)**: *m/z* calcd. for C<sub>12</sub>H<sub>13</sub>O<sub>3</sub><sup>+</sup> [M - H<sub>2</sub>O + H]<sup>+</sup> 187.0754; found 187.0754.

### 3.6. (E,E)-5-(1,2-methylenedioxy-benzen-4-yl)-penta-2,4-dienal (14)

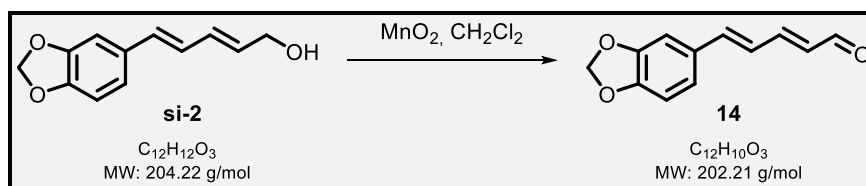

Prepared by adapting literature procedure.<sup>7</sup> To a solution of **si-2** (320 mg, 1.56 mmol, 1.0 equiv) in CH<sub>2</sub>Cl<sub>2</sub> (20 mL), 8 batches of MnO<sub>2</sub> (500 mg, 5.75 mmol, 8 x 3.7 equiv) were added every 30 min. 30 after the addition of the last batch, the reaction mixture

was filtered through a silica plug (CH<sub>2</sub>Cl<sub>2</sub> washes). The filtrate was concentrated under reduced pressure to afford **14** as yellow solid (300 mg, 94%).

- **R<sub>f</sub>** = 0.39 (CH<sub>2</sub>Cl<sub>2</sub>);
- **<sup>1</sup>H NMR** (300 MHz, chloroform-d) δ: 9.59 (d, *J* = 7.9 Hz, 1H), 7.23 (dd, *J* = 15.2, 10.2 Hz, 1H), 7.03 (d, *J* = 1.7 Hz, 1H), 6.99 – 6.93 (m, 1H), 6.92 – 6.86 (m, 1H), 6.86 – 6.77 (m, 2H), 6.23 (dd, *J* = 15.0, 7.9 Hz, 1H), 6.00 (s, 2H);
- **<sup>13</sup>C{<sup>1</sup>H} NMR ppm** (75 MHz, chloroform-d): δ 193.5, 152.3, 149.2, 148.5, 142.3, 131.0, 130.3, 124.6, 123.7, 108.7, 106.2, 101.6;
- **IR** (neat) *v* = 2850, 1672, 1617, 1597, 1503, 1487, 1447, 1360, 1250, 1194, 1156, 1132, 1111, 1036, 1010, 984, 929 cm<sup>-1</sup>;
- **HRMS(ESI)**: *m/z* calcd. for C<sub>12</sub>H<sub>11</sub>O<sub>3</sub><sup>+</sup> [M + H]<sup>+</sup> 203.0703; found 203.0723.

### 3.7. Piperettine (**3**)

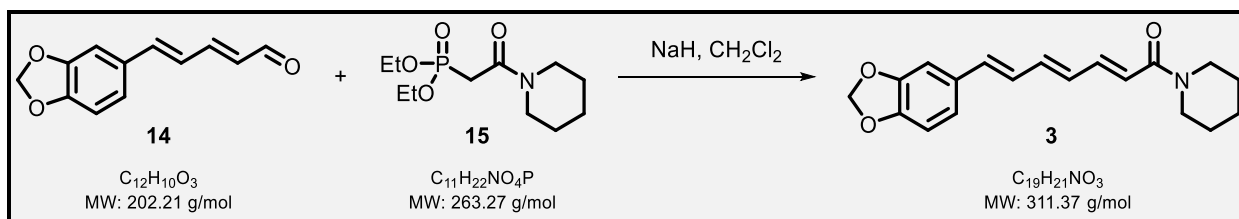

To a solution of **14** (300 mg, 1.49 mmol, 1.0 equiv) and **15** (560 mg, 2.13 mmol, 1.4 equiv) in CH<sub>2</sub>Cl<sub>2</sub> (20.0 mL), NaH (60%, 160 mg, 4.0 mmol, 2.7 equiv) was added. After 18 h of stirring, the reaction mixture is quenched with H<sub>2</sub>O (15 mL). The organic layer was separated, dried over Na<sub>2</sub>SO<sub>4</sub> and concentrated under reduced pressure. Purification by flash chromatography on silica gel (eluent: CH<sub>2</sub>Cl<sub>2</sub>/MeOH, 99:1) afforded **3** as a yellow solid (220 mg, 48%). Consistent with the literature description.<sup>8</sup>

- **R<sub>f</sub>** = 0.49 (CH<sub>2</sub>Cl<sub>2</sub>/MeOH, 99:1);
- Aniseed scent
- **<sup>1</sup>H NMR** (300 MHz, chloroform-d) δ: 7.35 (dd, *J* = 14.7, 11.2 Hz, 1H), 6.96 (d, *J* = 1.7 Hz, 1H), 6.86 (dd, *J* = 8.1, 1.7 Hz, 1H), 6.76 (d, *J* = 8.0 Hz, 1H), 6.71 – 6.55 (m, 3H), 6.47 – 6.33 (m, 2H), 5.96 (s, 2H), 3.56 (m, 4H), 1.83 – 1.51 (m, 6H);

<sup>8</sup> N. Nandakumar, S. Muthuraman, P. Gopinath, P. Nithya, J. Gopas, R. S. Kumar, *Eur. J. Med. Chem.* **2017**, *125*, 1076–1087.

- $^{13}\text{C}\{^1\text{H}\}$  NMR ppm (75 MHz, chloroform-d):  $\delta$  165.6, 148.4, 147.9, 142.4, 139.2, 135.4, 131.7, 130.6, 126.9, 122.1, 120.3, 108.6, 105.7, 101.4, 47.1, 43.4, 26.88, 25.9, 24.8;
- IR (neat)  $\nu$  = 2935, 2854, 1634, 1575, 1504, 1488, 1434, 1251, 1136, 1118, 1038, 1033, 929  $\text{cm}^{-1}$ ;
- HRMS(ESI):  $m/z$  calcd. for  $\text{C}_{19}\text{H}_{21}\text{NO}_3$   $[\text{M} + \text{H}]^+$  312.1595; found 312.1602.

### 3.8. Compound 16

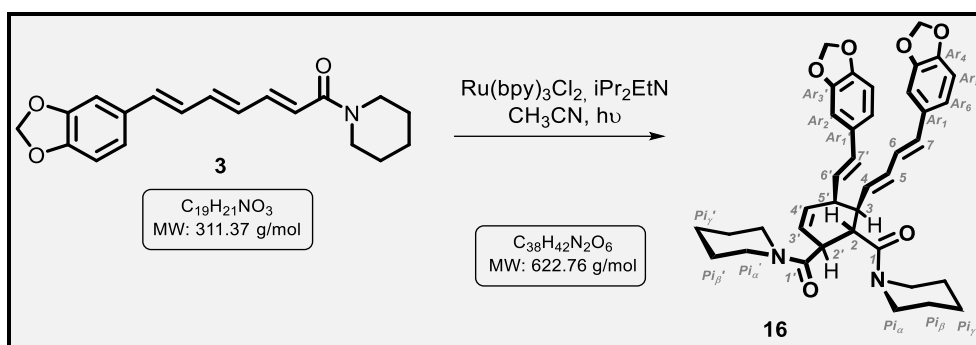

A solution of piperettine (**3**) (35 mg, 0.11 mmol, 1.0 equiv),  $\text{Ru}(\text{bpy})_3\text{Cl}_2$  (3.8 mg, 0.005 mmol, 0.05 equiv) or  $\text{Ir}(\text{ppy})_3$  (3.3 mg, 0.005 mmol, 0.05 equiv) and  $i\text{Pr}_2\text{EtN}$  (37  $\mu\text{L}$ , 0.212 mmol, 2.0 equiv) in  $\text{CH}_3\text{CN}$  (1.0 mL) was prepared in a glass tube. Solution was irradiated in an Hepatochem® PhotoRedOx Box™ photoreactor with a blue LEDs light [465 nm]. After 16 h of reaction mixture was concentrated under reduced pressure. Alternative, reaction can also be performed with  $\text{Ru}(\text{phen})_3\text{Cl}_2$  (3.6 mg, 0.005 mmol, 0.05 equiv) (without  $i\text{Pr}_2\text{EtN}$ ) under an argon atmosphere for 4 days. Purification by preparative (TLC  $\text{CH}_2\text{Cl}_2/\text{EtOH} = 99:1$ ) afforded B (**16**) as a white solid. Conditions with  $\text{Ru}(\text{bpy})_3\text{Cl}_2$ : 5 mg, 15%; conditions with  $\text{Ir}(\text{ppy})_3$ : 3.5 mg, 15%; conditions with  $\text{Ru}(\text{phen})_3\text{Cl}_2$ : 5 mg, 15%.

- $R_f = 0.35$  ( $\text{CH}_2\text{Cl}_2/\text{MeOH}$ , 99:1);
- $^1\text{H}$  NMR (400 MHz, chloroform-d)  $\delta$ : 6.97 (d,  $J = 1.7$  Hz, 1H), 6.89 (d,  $J = 1.7$  Hz, 1H), 6.84 (dd,  $J = 8.0, 1.7$  Hz, 1H), 6.81 – 6.70 (m, 3H), 6.50 (dd,  $J = 15.7, 10.1$  Hz, 1H), 6.42 – 6.34 (m, 2H), 6.23 (dd,  $J = 15.0, 10.2$  Hz, 1H), 6.06 (m, 1H), 5.96 (s, 2H), 5.93 (d, 5.3 Hz, 2H), 5.78 (ddd,  $J = 10.0, 5.1, 2.8$  Hz, 1H), 5.63 (dt,  $J = 10.0, 1.6$  Hz, 1H), 5.56 (dd,  $J = 15.0, 10.0$  Hz, 1H), 4.08 (dq,  $J = 7.4, 2.4$  Hz, 1H), 3.63 (dd,  $J = 10.8, 9.6$  Hz, 1H), 3.58 – 3.44 (m, 7H), 3.37 (m, 1H), 3.05 (d,  $J = 10.0$  Hz, 1H), 2.84 (td,  $J = 10.8, 5.2$  Hz, 1H), 1.74 – 1.44 (m, 12H).

- **$^{13}\text{C}\{^1\text{H}\}$  NMR ppm** (101 MHz, chloroform-d):  $\delta$  172.4, 171.1, 148.2, 148.2, 147.3, 147.2, 133.3, 132.9, 132.8, 132.2, 132.1, 131.5, 130.6, 127.4, 127.4, 125.3, 121.3, 121.1, 108.5, 108.4, 106.0, 105.5, 101.2 (2C), 47.2, 47.2, 45.3, 43.6, 43.6, 43.5, 43.1, 38.6, 26.9, 26.6, 25.9, 25.9, 24.8 (2C);
- **IR** (neat)  $\nu$  = 2953, 2934, 2557, 1708, 1618, 1489, 1445, 1355, 1252  $\text{cm}^{-1}$ ;
- **HRMS(ESI)**:  $m/z$  calcd. for  $\text{C}_{38}\text{H}_{43}\text{N}_2\text{O}_6^+$   $[\text{M} + \text{H}]^+$  623.3116; found 623.3123.

**Table S8:** <sup>1</sup>H NMR and <sup>13</sup>C NMR data of compound **16** in chloroform-*d*.

| Attribution                         | <sup>1</sup> H δ (ppm) | m   | int. | J (Hz)              | <sup>13</sup> C δ (ppm) |
|-------------------------------------|------------------------|-----|------|---------------------|-------------------------|
| 1                                   | -                      |     |      |                     | 172.4                   |
| 2                                   | 3.66                   | dd  | 1    | 11.8 – 9.6 Hz       | 38.6                    |
| 3                                   | 2.84                   | td  | 1    | 10.8 – 5.2 Hz       | 45.3                    |
| 4                                   | 5.56                   | dd  | 1    | 15.0 – 10.0 Hz      | 133.3                   |
| 5                                   | 6.23                   | dd  | 1    | 15.0 – 10.2 Hz      | 132.9                   |
| 6                                   | 6.50                   | dd  | 1    | 15.7 – 10.1 Hz      | 127.4                   |
| 7                                   | 6.38                   | m   | 1    |                     | 131.5                   |
| Ar <sub>1</sub>                     | -                      |     |      |                     | 132.2                   |
| Ar <sub>2</sub>                     | 6.89                   | d   | 1    | 1.7 Hz              | 105.5                   |
| Ar <sub>3</sub>                     | -                      |     |      |                     | 148.2                   |
| Ar <sub>4</sub>                     | -                      |     |      |                     | 147.3                   |
| Ar <sub>5</sub>                     | 6.73                   | m   | 1    |                     | 108.5                   |
| Ar <sub>6</sub>                     | 6.77                   | m   | 1    |                     | 121.3                   |
| [O-CH <sub>2</sub> -O]              | 5.93                   | d   | 2    | 5.3 Hz              | 101.2                   |
| 1'                                  | -                      |     |      |                     | 171.1                   |
| 2'                                  | 4.08                   | dq  | 1    | 7.4 – 2.4 Hz        | 43.6                    |
| 3'                                  | 5.78                   | ddd | 1    | 10.0 – 5.1 – 2.8 Hz | 125.3                   |
| 4'                                  | 5.63                   | dt  | 1    | 10.0 – 1.6 Hz       | 130.6                   |
| 5'                                  | 3.05                   | d   | 1    | 10.0 Hz             | 43.6                    |
| 6'                                  | 6.06                   | m   | 1    |                     | 127.4                   |
| 7'                                  | 6.39                   | m   | 1    |                     | 132.8                   |
| Ar <sub>1</sub> '                   | -                      |     |      |                     | 132.1                   |
| Ar <sub>2</sub> '                   | 6.97                   | d   | 1    | 1.7 Hz              | 106.0                   |
| Ar <sub>3</sub> '                   | -                      |     |      |                     | 148.2                   |
| Ar <sub>4</sub> '                   | -                      |     |      |                     | 147.2                   |
| Ar <sub>5</sub> '                   | 6.75                   | m   | 1    |                     | 108.4                   |
| Ar <sub>6</sub> '                   | 6.84                   | dd  | 1    | 8.0 – 1.7 Hz        | 121.1                   |
| [O-CH <sub>2</sub> -O]'             | 5.96                   | s   | 2    |                     | 101.2                   |
| Pi <sub>α</sub> & Pi <sub>α</sub> ' | 3.58 – 3.34            | m   | 6    |                     | 47.2                    |
|                                     |                        |     |      |                     | 47.2                    |
|                                     |                        |     |      |                     | 43.5                    |
|                                     | 3.58 – 3.34            | m   | 1    |                     | 43.1                    |
|                                     | 3.37                   | m   | 1    |                     |                         |
| Pi <sub>β</sub> & Pi <sub>β</sub> ' | 1.74 – 1.44            | m   | 8    |                     | 26.6                    |
|                                     |                        |     |      |                     | 26.6                    |
|                                     |                        |     |      |                     | 25.9                    |
|                                     |                        |     |      |                     | 25.9                    |
| Pi <sub>γ</sub> & Pi <sub>γ</sub> ' | 1.74 – 1.44            | m   | 4    |                     | 24.8                    |

## 4. Assemblies performed in 3D printed continuous-flow system

### 4.1. Continuous flow reactor

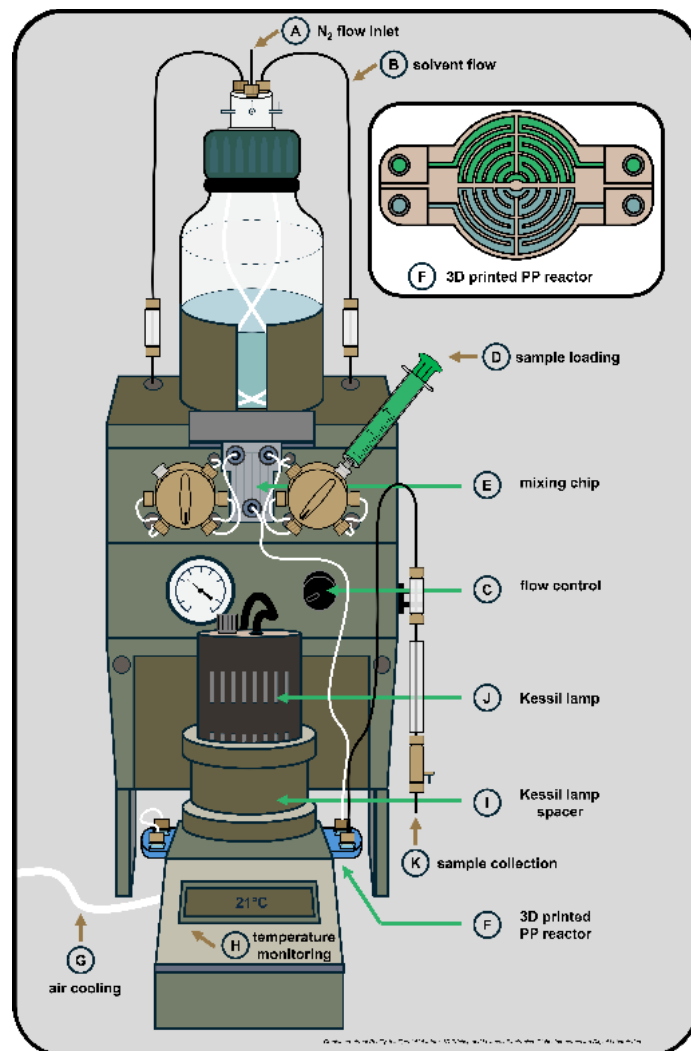

Figure S1 : 3D printed nitrogen (or air) driven continuous-flow system.

**A:** Nitrogen (or compress air) flow inlet; **B:** Solvent flow from the solvent bottle; **C:** Flow control; **D:** Sample loading (6 port injection loop); **E:** 3D printed polypropylene mixing chip; **F:** 3D printed polypropylene reactor (1 chamber way = 1.0 mL, 2 chamber way = 2.0 mL); **G:** Reactor compress cooling air; **H:** Digital temperature monitoring; **I:** Kessil® lamp spacer; **J:** Kessil® lamp; **K:** Sample collection.

## 4.2. Continuous flow assembly of piperine (1)

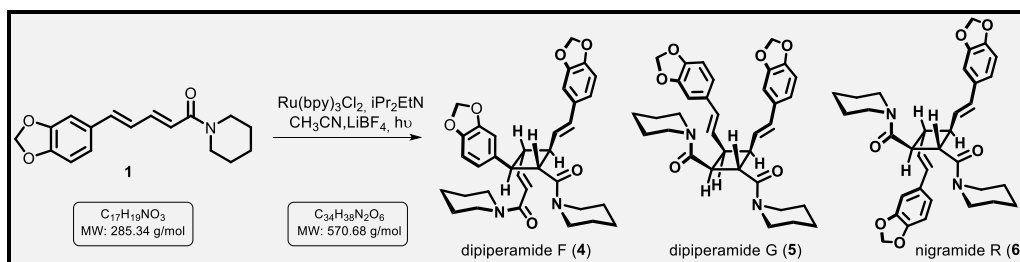

A solution of piperine (**1**) (34 mg, 0.12 mmol, 1.0 equiv.), Ru(bpy)<sub>3</sub>Cl<sub>2</sub>·6H<sub>2</sub>O (4.5 mg, 0.006 mmol, 0.05 equiv.) and *i*Pr<sub>2</sub>EtN (42 μL, 0.24 mmol, 2.0 equiv) and in CH<sub>3</sub>CN (1.0 mL) was prepared. A solution of LiBF<sub>4</sub> in CH<sub>3</sub>CN (1.0 M, 420 μL, 0.42 mmol, 4.0 equiv) was added. The reaction mixture was injected into the 3D printed continuous-flow system (25 min total duration). The solvent flow is maintained at 0.1 mL/min using N<sub>2</sub> flow. The flow reactor (2 mL, 20 min residence time) was irradiated with a blue LEDs light [Kessil®, PR160L, 456 nm, 50W, 100% intensity]. The reaction mixture was collected in a round bottom flask and concentrated under vacuum. Three batches were combined and purified by preparative TLC on silica gel (eluent: CH<sub>2</sub>Cl<sub>2</sub>/MeOH, 99:1) to afford nigramide R (**6**) as white solid (R<sub>f</sub> = 0.39, 51 mg, 50 %), dipiperamide G (**5**) as white solid (R<sub>f</sub> = 0.26, 13 mg, 13 %) and dipiperamide F (**4**) as white solid (R<sub>f</sub> = 0.19, 17 mg, 17 %).

**Table S9** : Screening of conditions for the dimerization of piperine (**1**) with the 3D printed continuous-flow system

| Entry          | Catalyst                                       | Conditions                                                                       | Result                                                                                                                                    |
|----------------|------------------------------------------------|----------------------------------------------------------------------------------|-------------------------------------------------------------------------------------------------------------------------------------------|
| Batch (20 min) | Ru(bpy) <sub>3</sub> Cl <sub>2</sub><br>5%-mol | CH <sub>3</sub> CN, <i>i</i> Pr <sub>2</sub> EtN (2.0 equiv.)                    | <5 % conversion*                                                                                                                          |
| 1              | Ru(bpy) <sub>3</sub> Cl <sub>2</sub><br>5%-mol | CH <sub>3</sub> CN, <i>i</i> Pr <sub>2</sub> EtN (2.0 equiv.)                    | 60 % conversion*                                                                                                                          |
| 2              | Ru(bpy) <sub>3</sub> Cl <sub>2</sub><br>2%-mol | CH <sub>3</sub> CN, <i>i</i> Pr <sub>2</sub> EtN (2.0 equiv.)                    | 50 % conversion*                                                                                                                          |
| 3              | Ru(bpy) <sub>3</sub> Cl <sub>2</sub><br>5%-mol | CH <sub>3</sub> CN, <i>i</i> Pr <sub>2</sub> EtN (2.0 equiv.), LiBF <sub>4</sub> | Full conversion, dipiperamides F ( <b>4</b> ): 17 %; dipiperamides G ( <b>5</b> ): 13 %; nigramide R ( <b>6</b> ): 50% (isolated yields). |
| Batch (20 min) | Ir(bpy) <sub>3</sub><br>2.5%-mol               | CH <sub>3</sub> CN, <i>i</i> Pr <sub>2</sub> EtN (2.0 equiv.)                    | <5 % conversion*                                                                                                                          |
| 3              | Ir(bpy) <sub>3</sub><br>2.5%-mol               | CH <sub>3</sub> CN, <i>i</i> Pr <sub>2</sub> EtN (2.0 equiv.)                    | Full conversion, Z-chabamide ( <b>11</b> ): 44 %; Z-nigramide B ( <b>11</b> ): 15 %; (isolated yields).                                   |

\* Determined by NMR of the crude reaction mixture

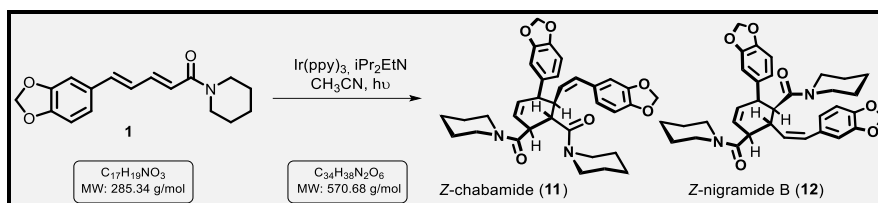

A solution of piperine (**1**) (34 mg, 0.12 mmol, 1.0 equiv.),  $Ir(ppy)_3$  (2.0 mg, 0.003 mmol, 0.025 equiv.) and  $iPr_2EtN$  (42  $\mu$ L, 0.24 mmol, 2.0 equiv) and in  $CH_3CN$  (1.0 mL) was prepared. The reaction mixture was injected into the 3D printed continuous-flow system (40 min total duration). The solvent flow is maintained at 0.1 mL/min using air flow. The flow reactor (2 mL, 20 min residence time) was irradiated with a blue LEDs light [Kessil<sup>®</sup>, PR160L, 456 nm, 50W, 100% intensity]. The reaction mixture was collected in a round bottom flask and concentrated under vacuum. The crude product was purified by preparative TLC on silica gel (eluent:  $CH_2Cl_2/MeOH$ , 99:1) to afford Z-chabamide (**11**) as white solid ( $R_f$  = 0.43, 15 mg, 44 %) and Z-nigramide B (**12**) as white solid ( $R_f$  = 0.40, 5 mg, 15 %).

## 5. Electrochemical analysis

### 5.1. General procedures for electrochemical analysis

Electrochemical potentials of starting materials were determined by measuring half-wave potentials ( $E_{1/2}$ ). The electrochemical measurements were recorded at room temperature with an AUTOLAB potentiostat/galvanostat (model: PGSTAT302N) using an undivided three-electrodes cell fitted with glassy carbon working electrode ( $\varnothing$  = 2mm), a platinum wire counter electrode and a saturated calomel electrode (SCE) as reference. Scan rate: 100  $mV \cdot s^{-1}$ . A 0.1 M solution of  $nBu_4NPF_6$  in  $CH_3CN$  was used as supporting electrolyte.

## 5.2. Cyclic voltammetry of piperine (1) [oxidation potential]

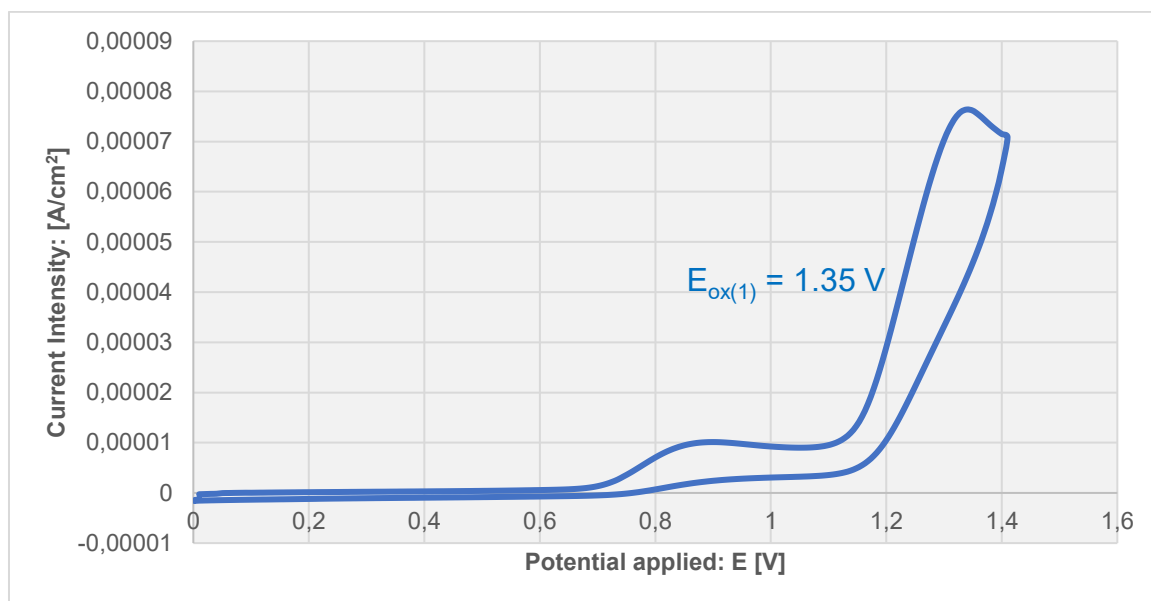

**Figure 2:** Cyclic voltammogram of piperine (1); 0.1 mM in a 0.1 M solution of  $n\text{Bu}_4\text{NPF}_6$  in  $\text{CH}_3\text{CN}$ ; scan rate = 100  $\text{mV}\cdot\text{s}^{-1}$ ; 0.0 mV  $\rightarrow$  1.4 mV  $\rightarrow$  0.0 mV; glassy carbon working electrode ( $\varnothing = 2\text{mm}$ )– Pt counter electrode – reference: saturated calomel electrode (SCE).

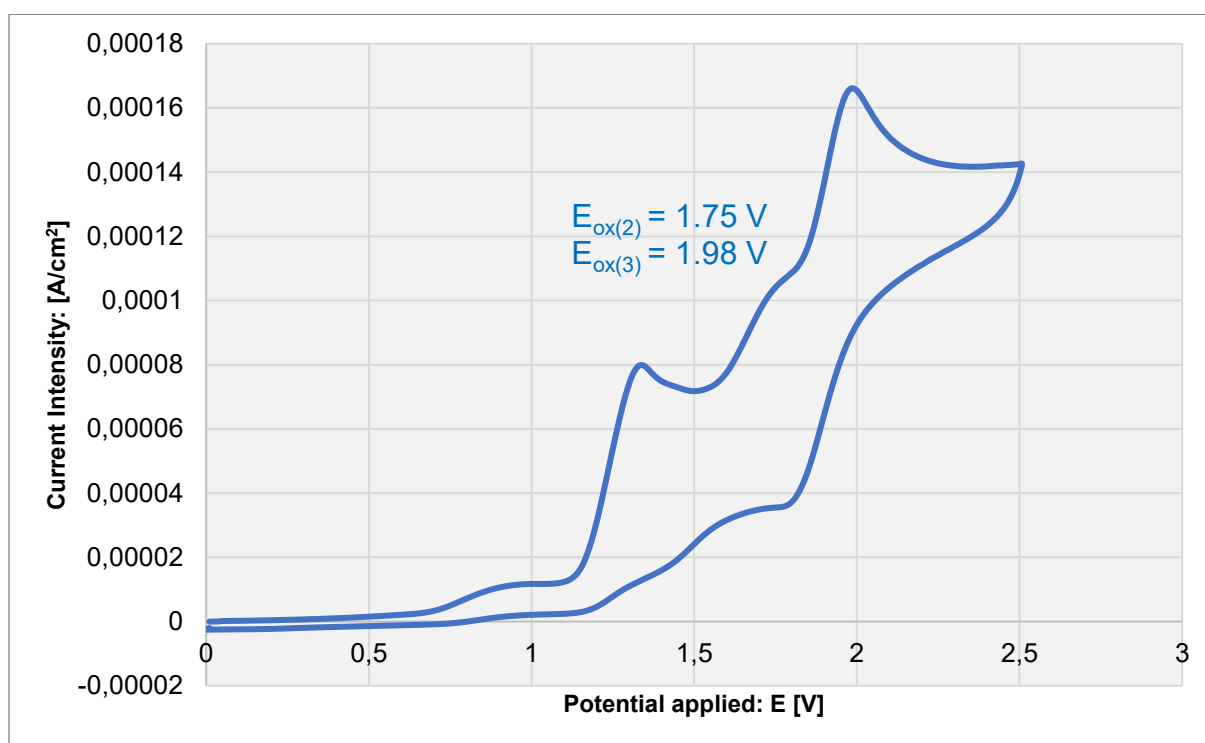

**Figure 3:** Cyclic voltammogram of piperine (1); 0.1 mM in a 0.1 M solution of  $n\text{Bu}_4\text{NPF}_6$  in  $\text{CH}_3\text{CN}$ ; scan rate = 100  $\text{mV}\cdot\text{s}^{-1}$ ; 0.0 mV  $\rightarrow$  2.5 mV  $\rightarrow$  0.0 mV; glassy carbon working electrode ( $\varnothing = 2\text{mm}$ )– Pt counter electrode – reference: saturated calomel electrode (SCE).

### 5.3. Cyclic voltammetry of piperine (1) [reduction potential]

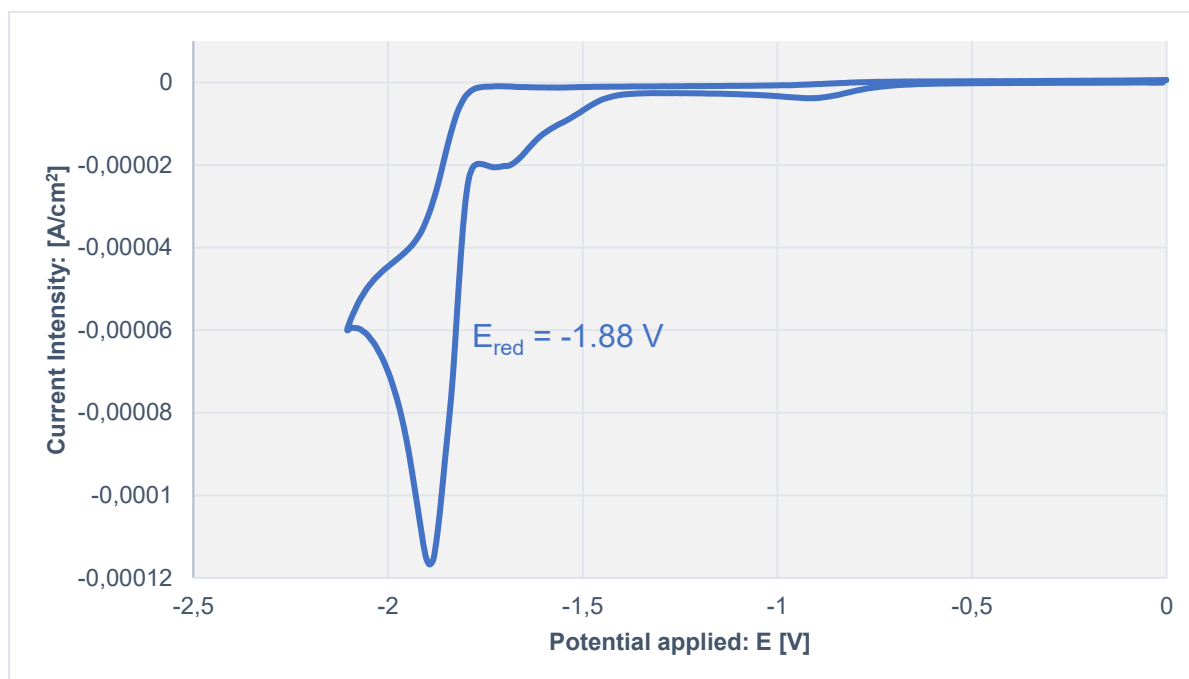

**Figure 4:** Cyclic voltammogram of piperine (1); 0.1 mM in a 0.1 M solution of  $n\text{Bu}_4\text{NPF}_6$  in  $\text{CH}_3\text{CN}$ ]; scan rate = 100  $\text{mV}\cdot\text{s}^{-1}$ ; 0.0 mV  $\rightarrow$  -2.1 mV  $\rightarrow$  0.0 mV; glassy carbon working electrode ( $\varnothing = 2\text{mm}$ ) – Pt counter electrode – reference: saturated calomel electrode (SCE).

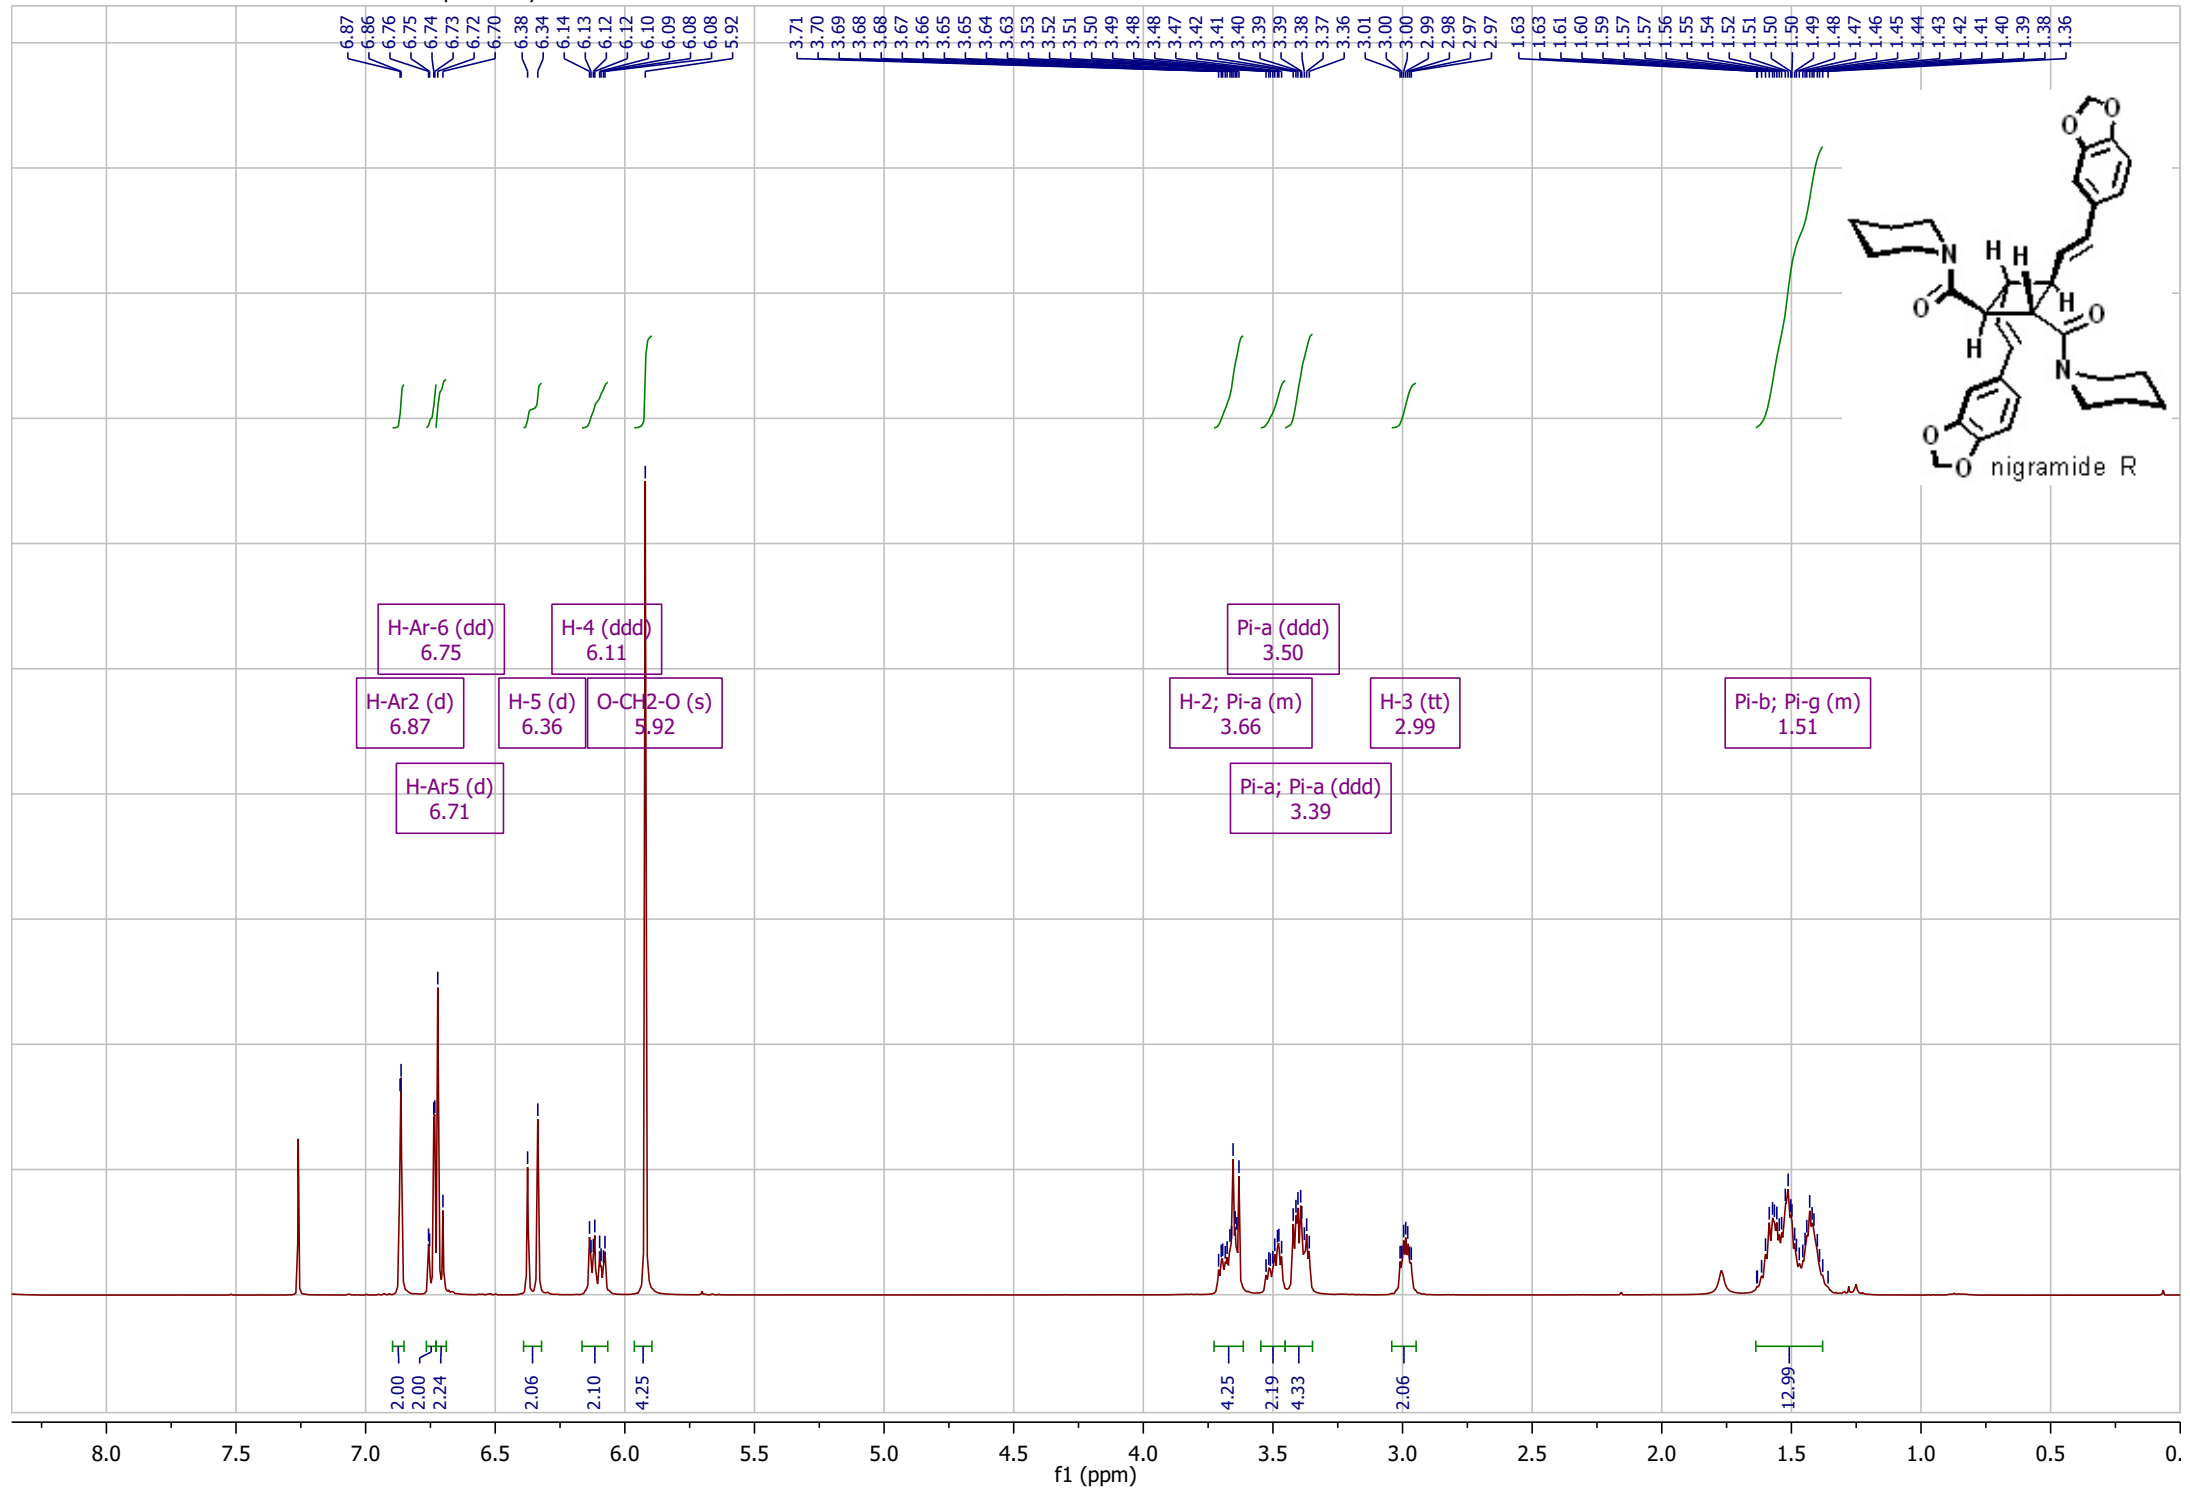

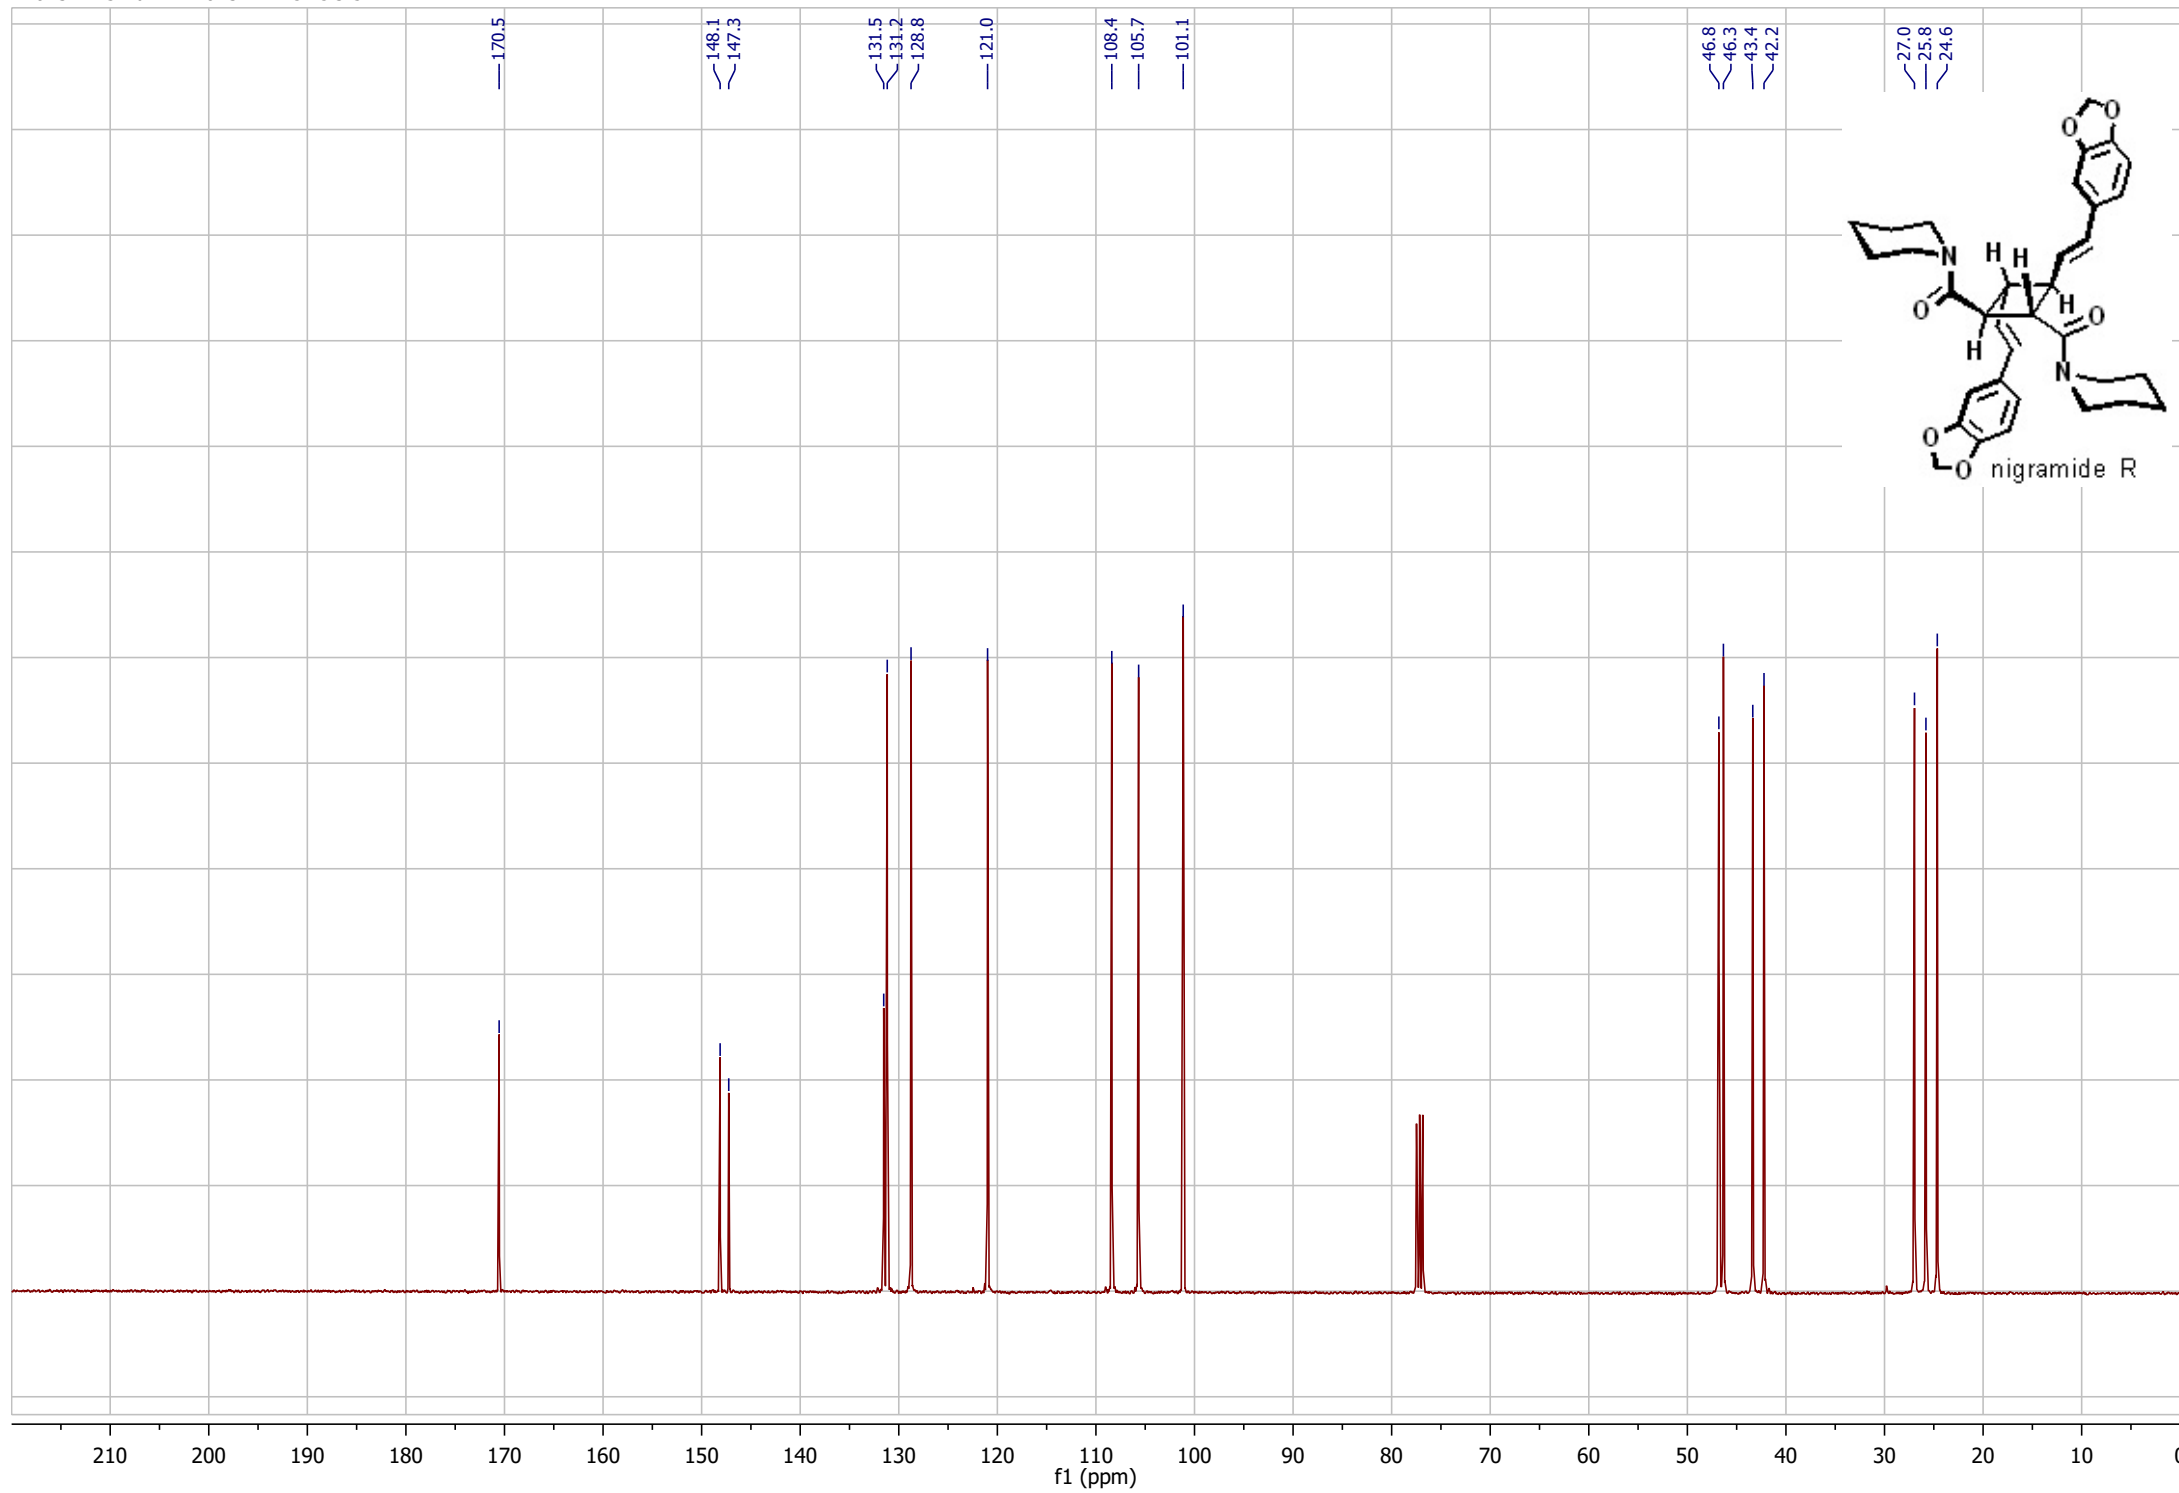

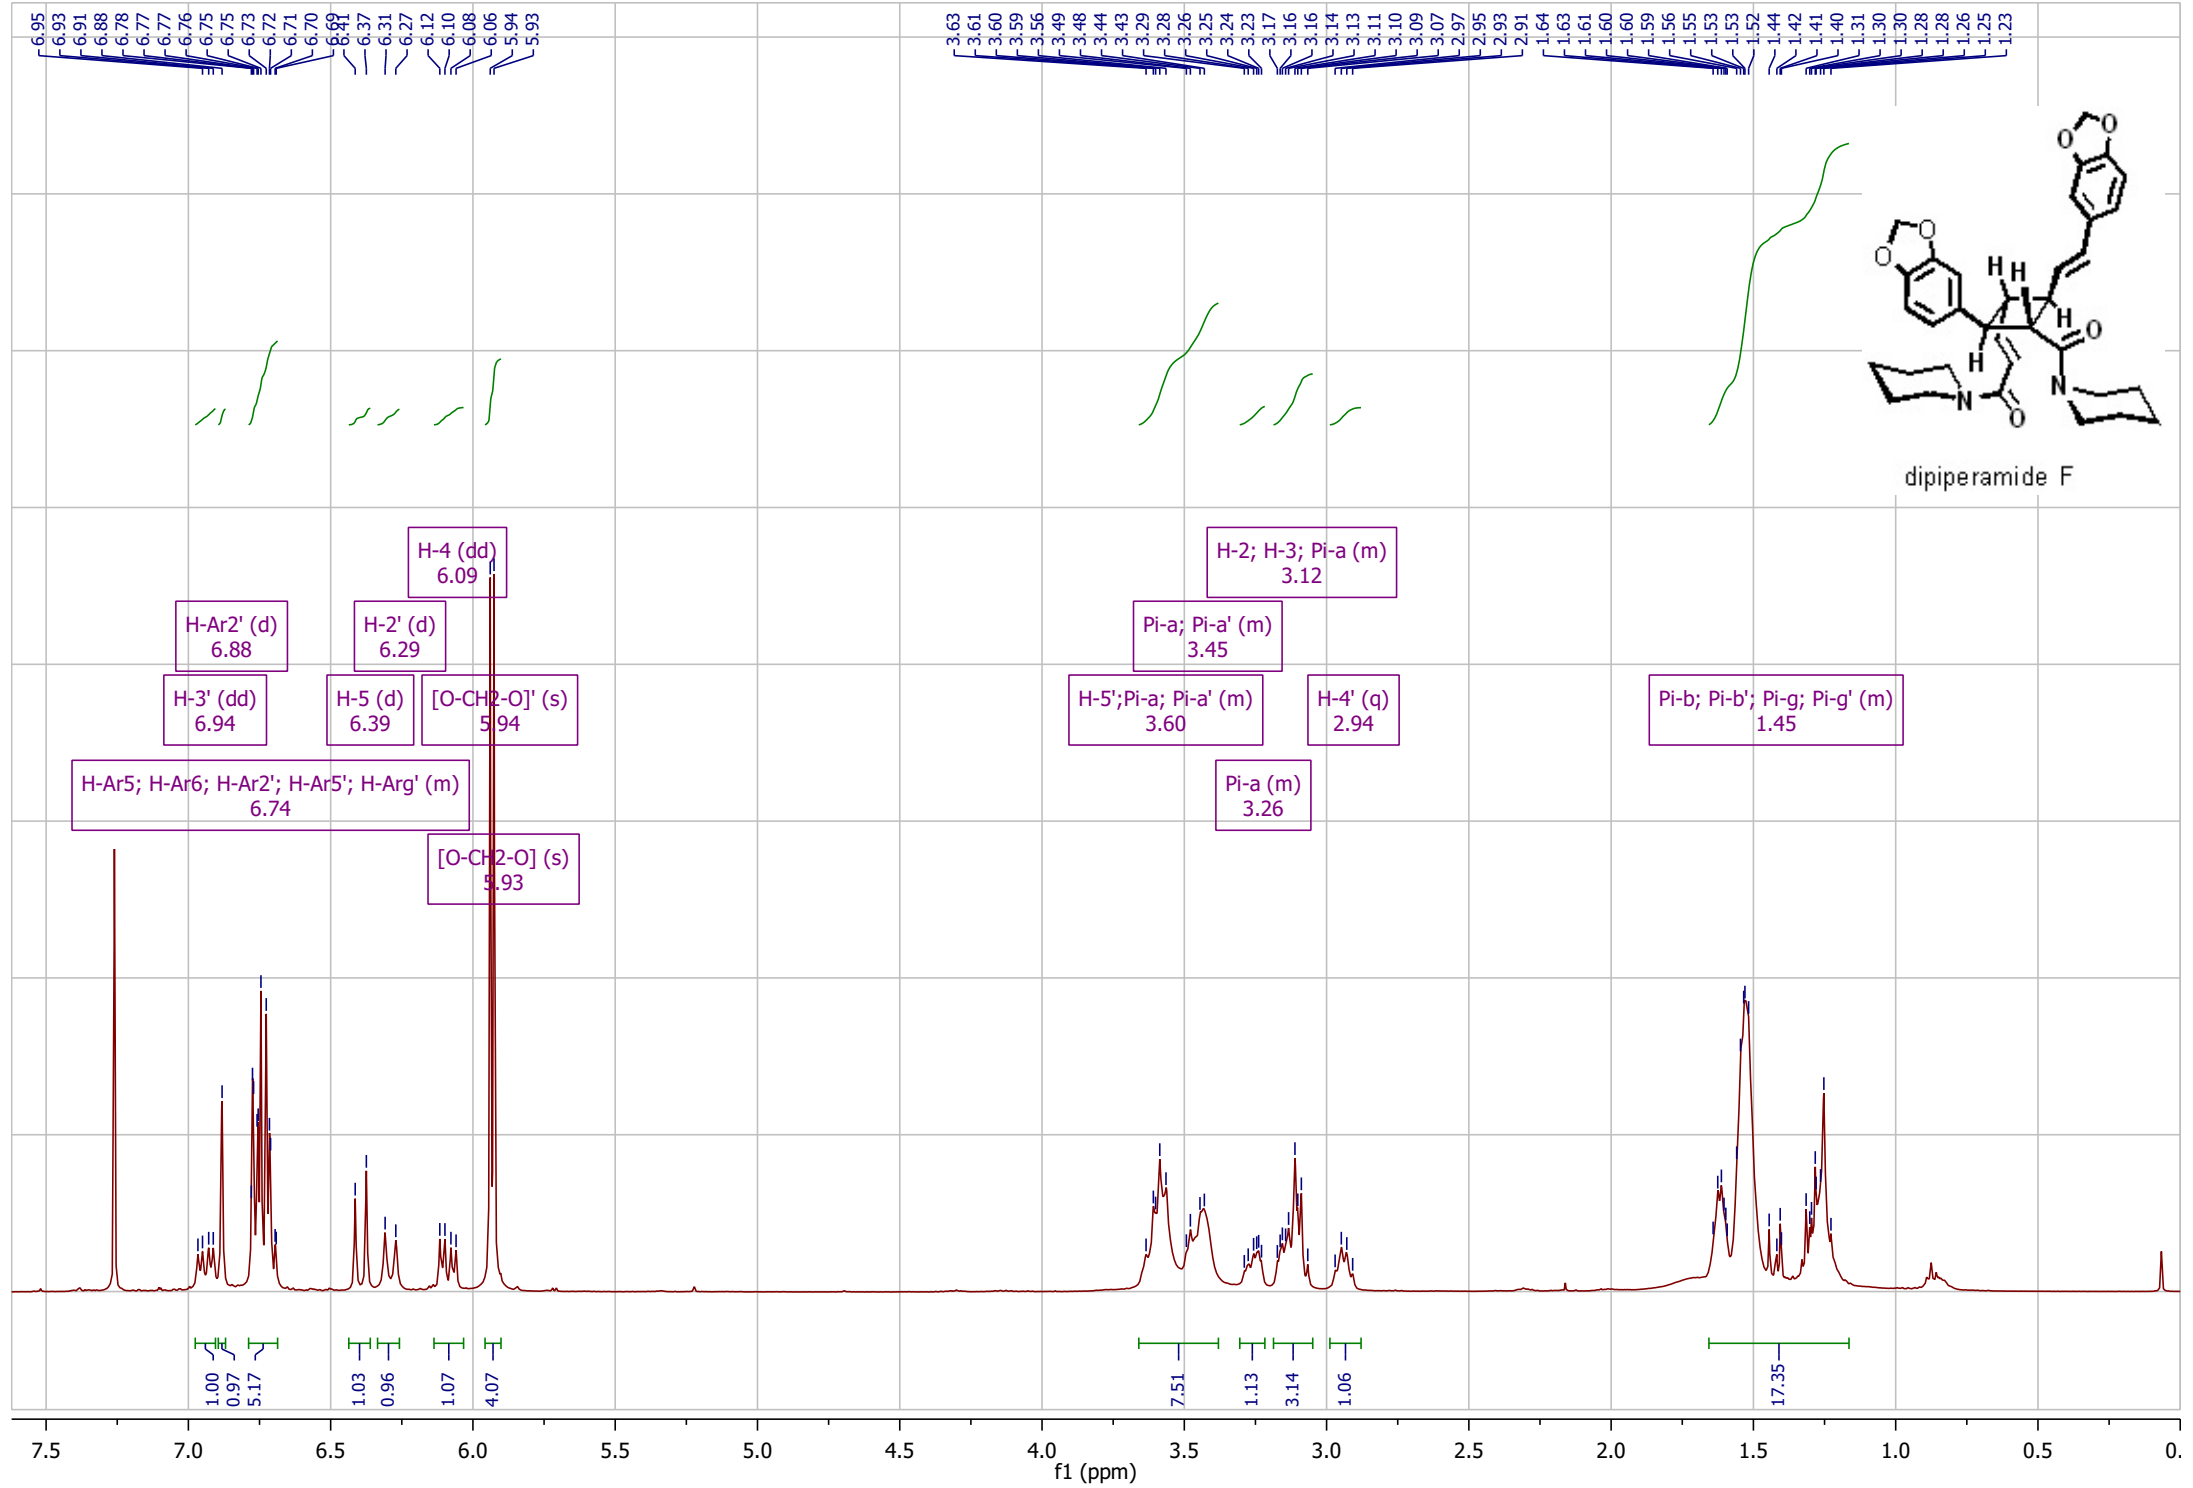

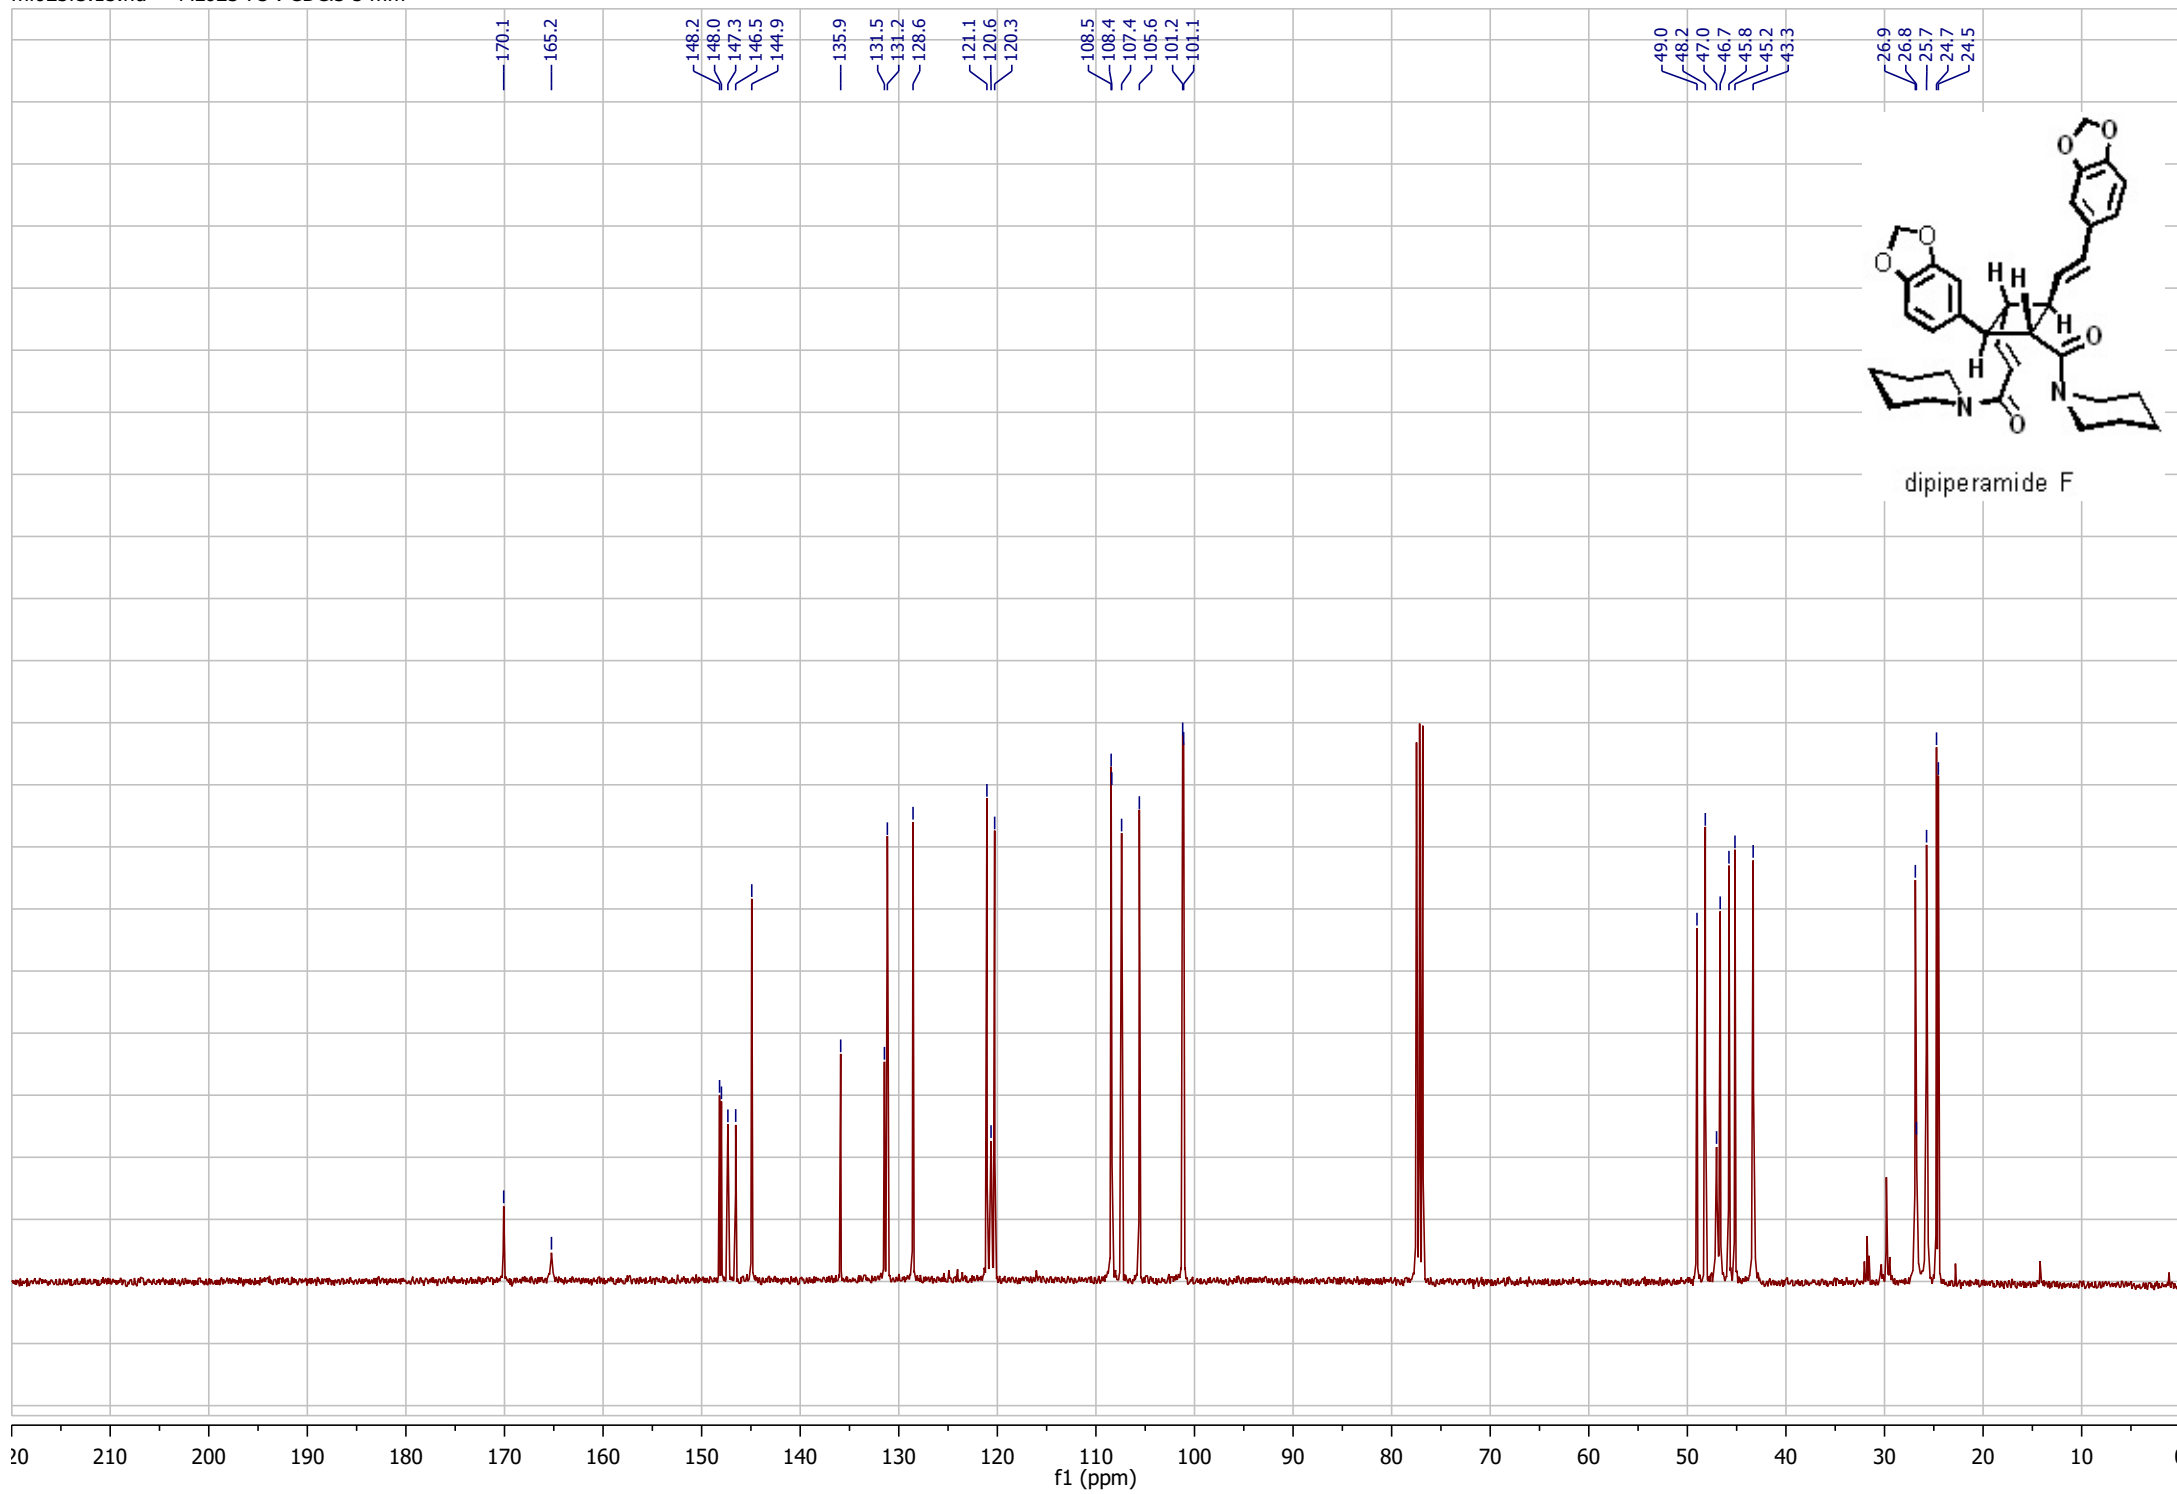

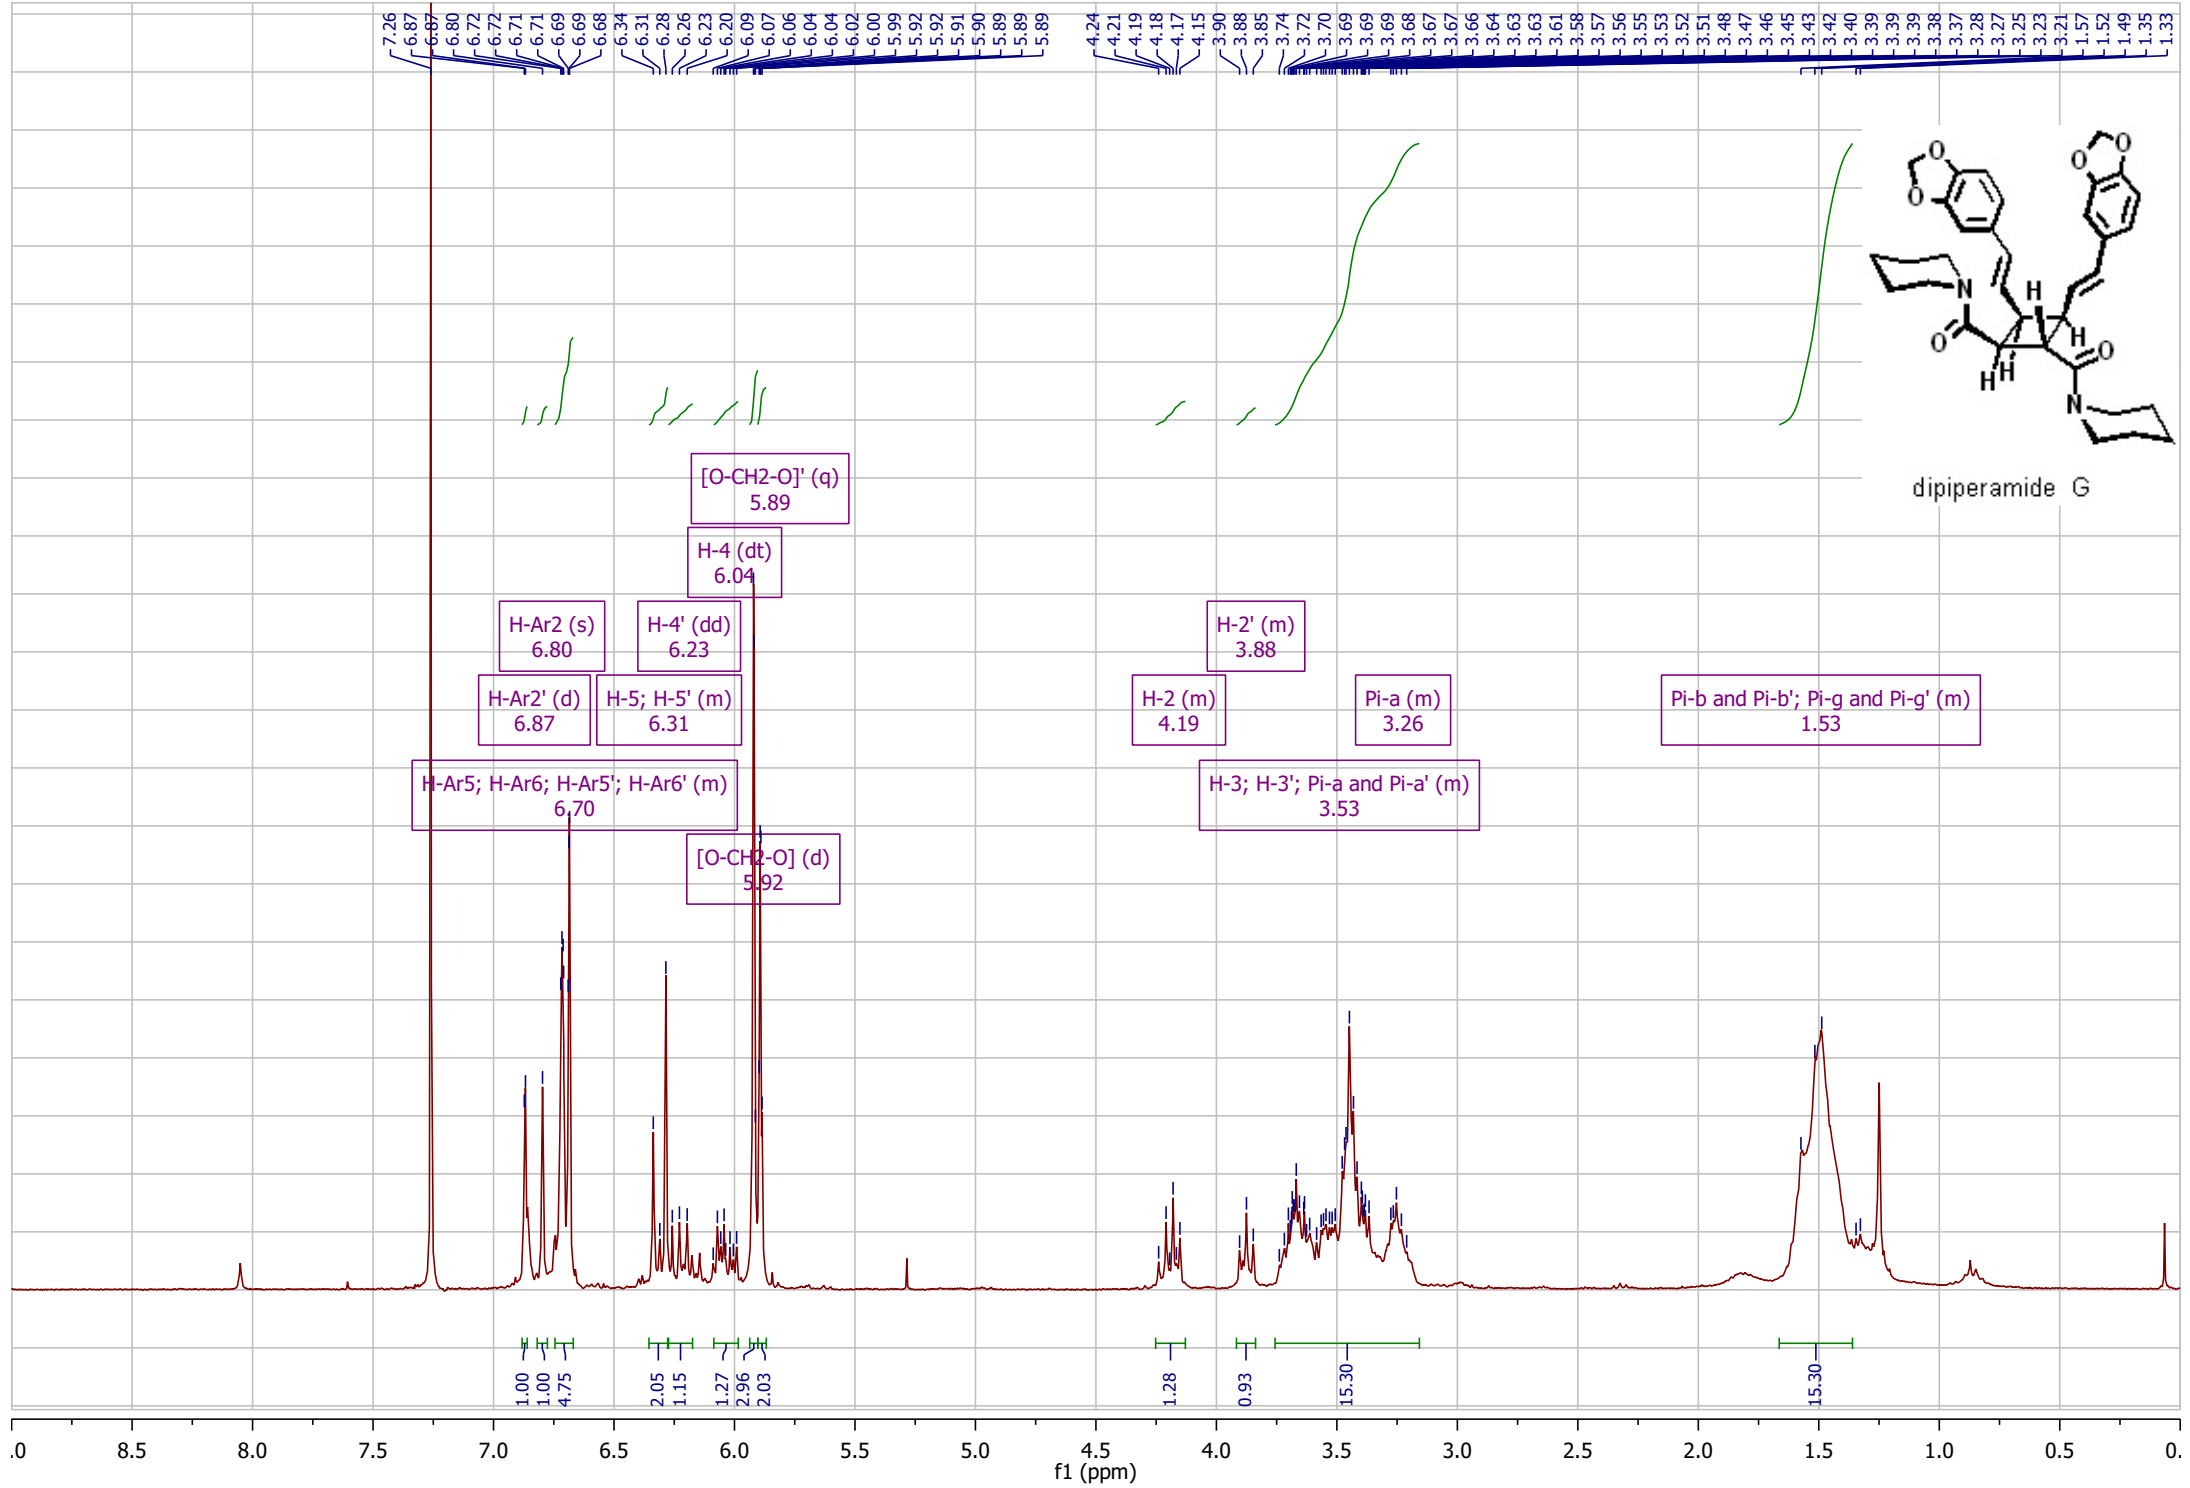

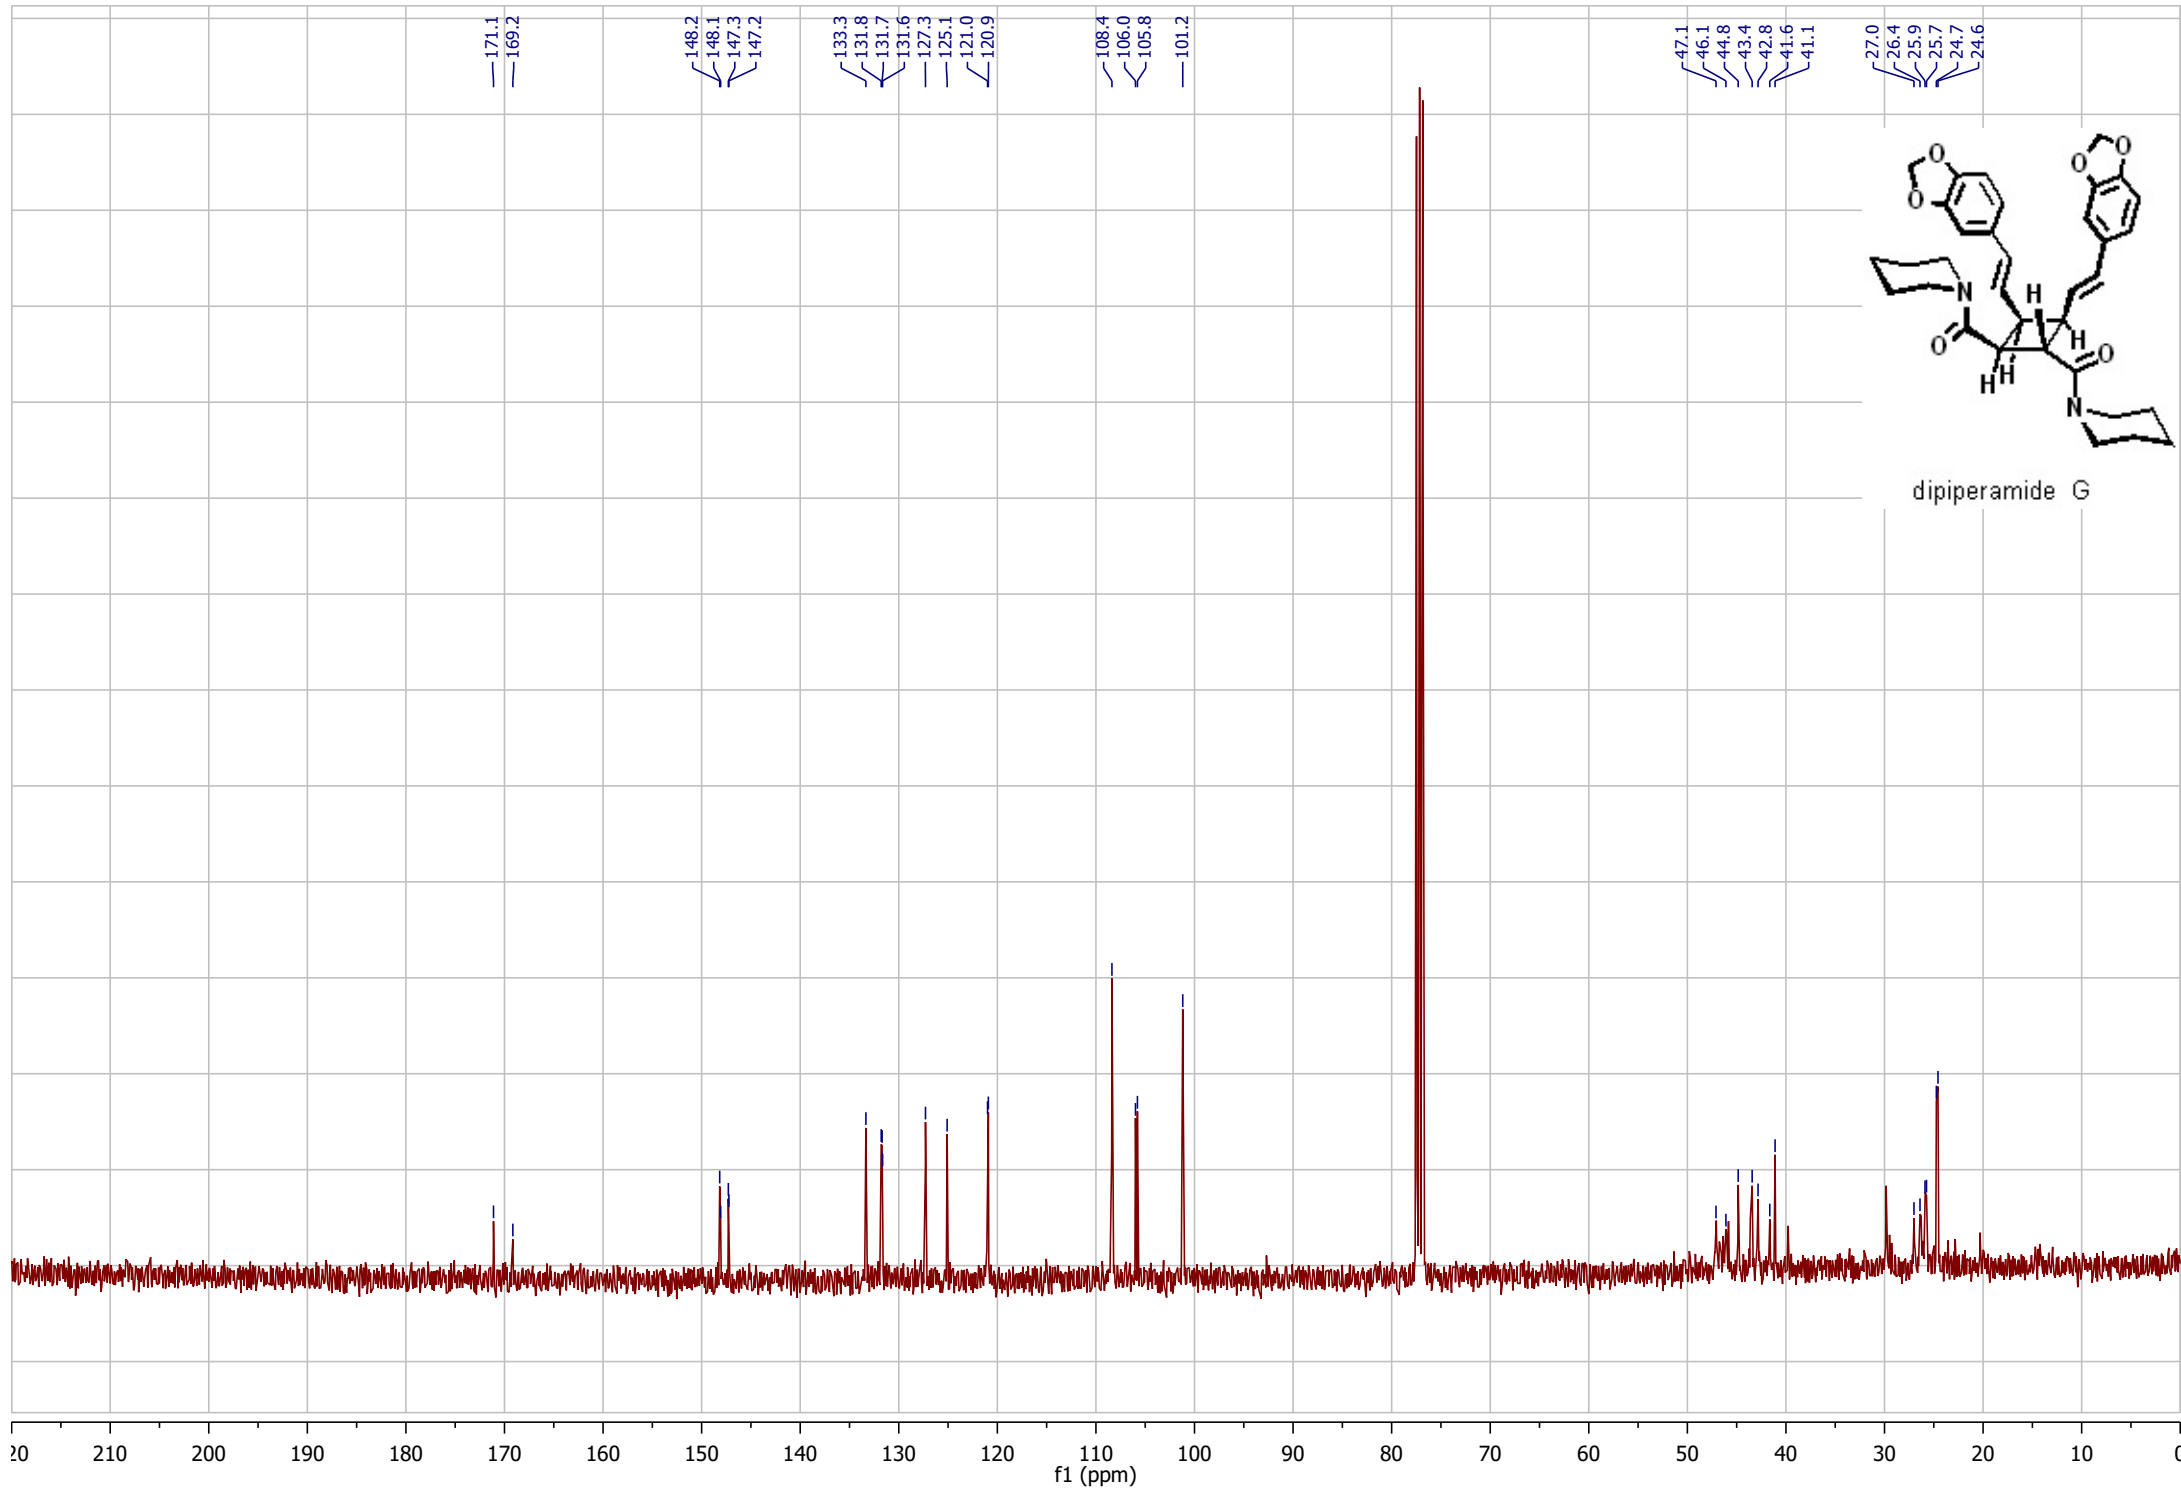

dipiperamide G

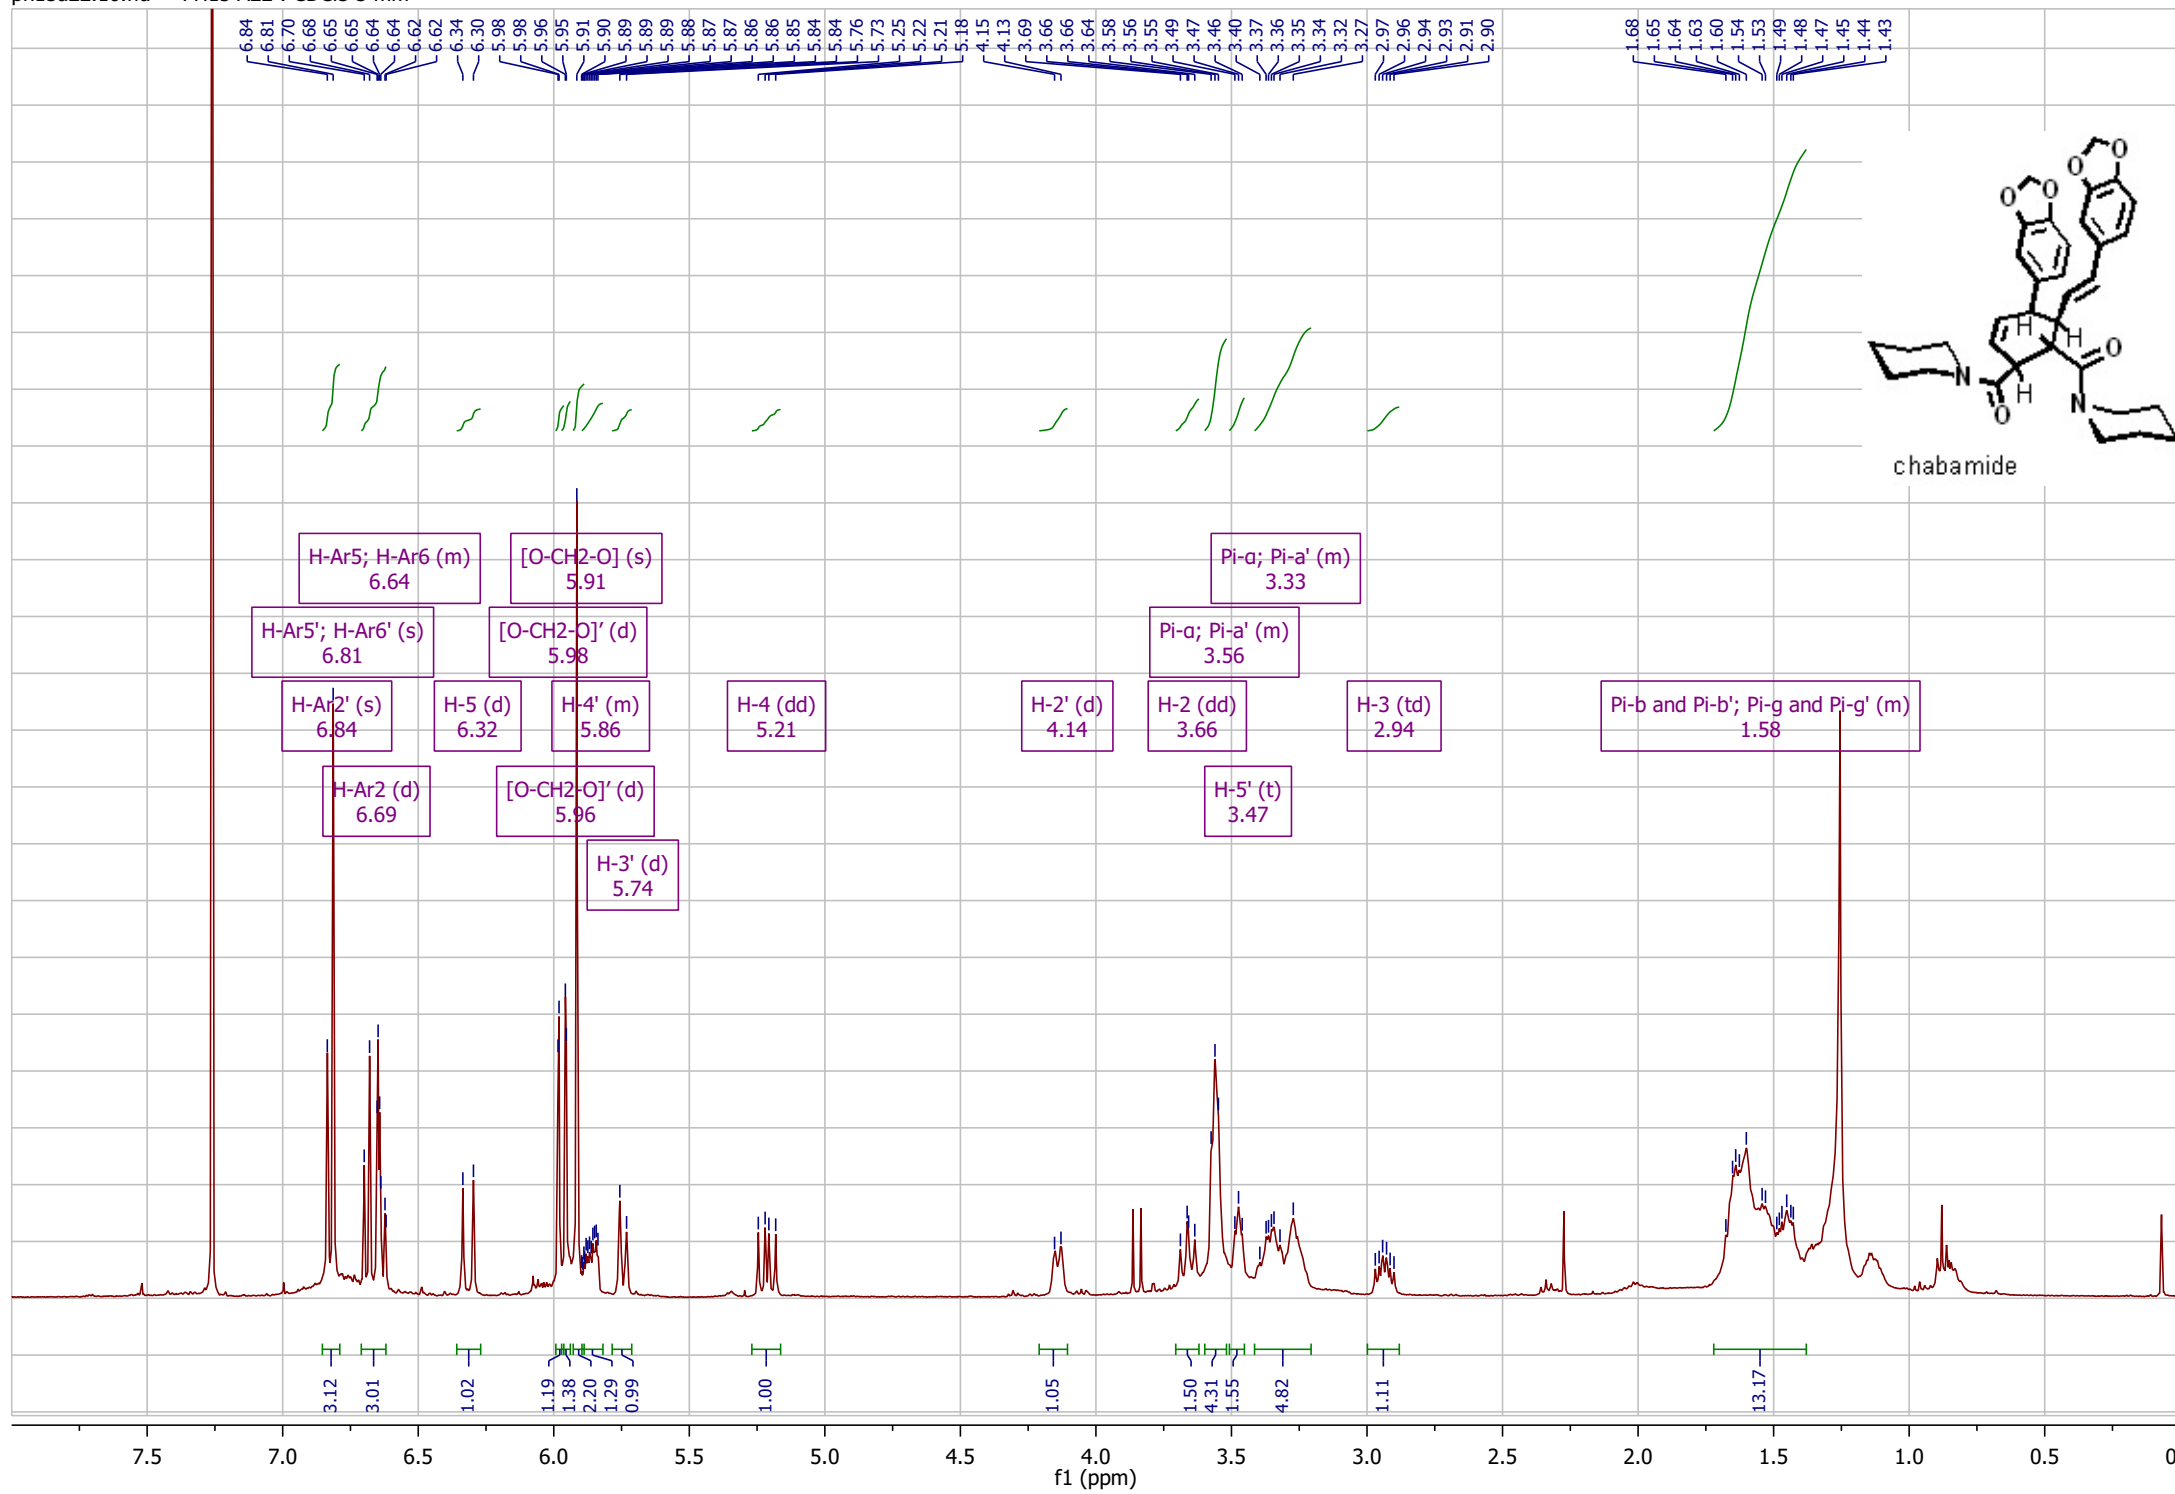

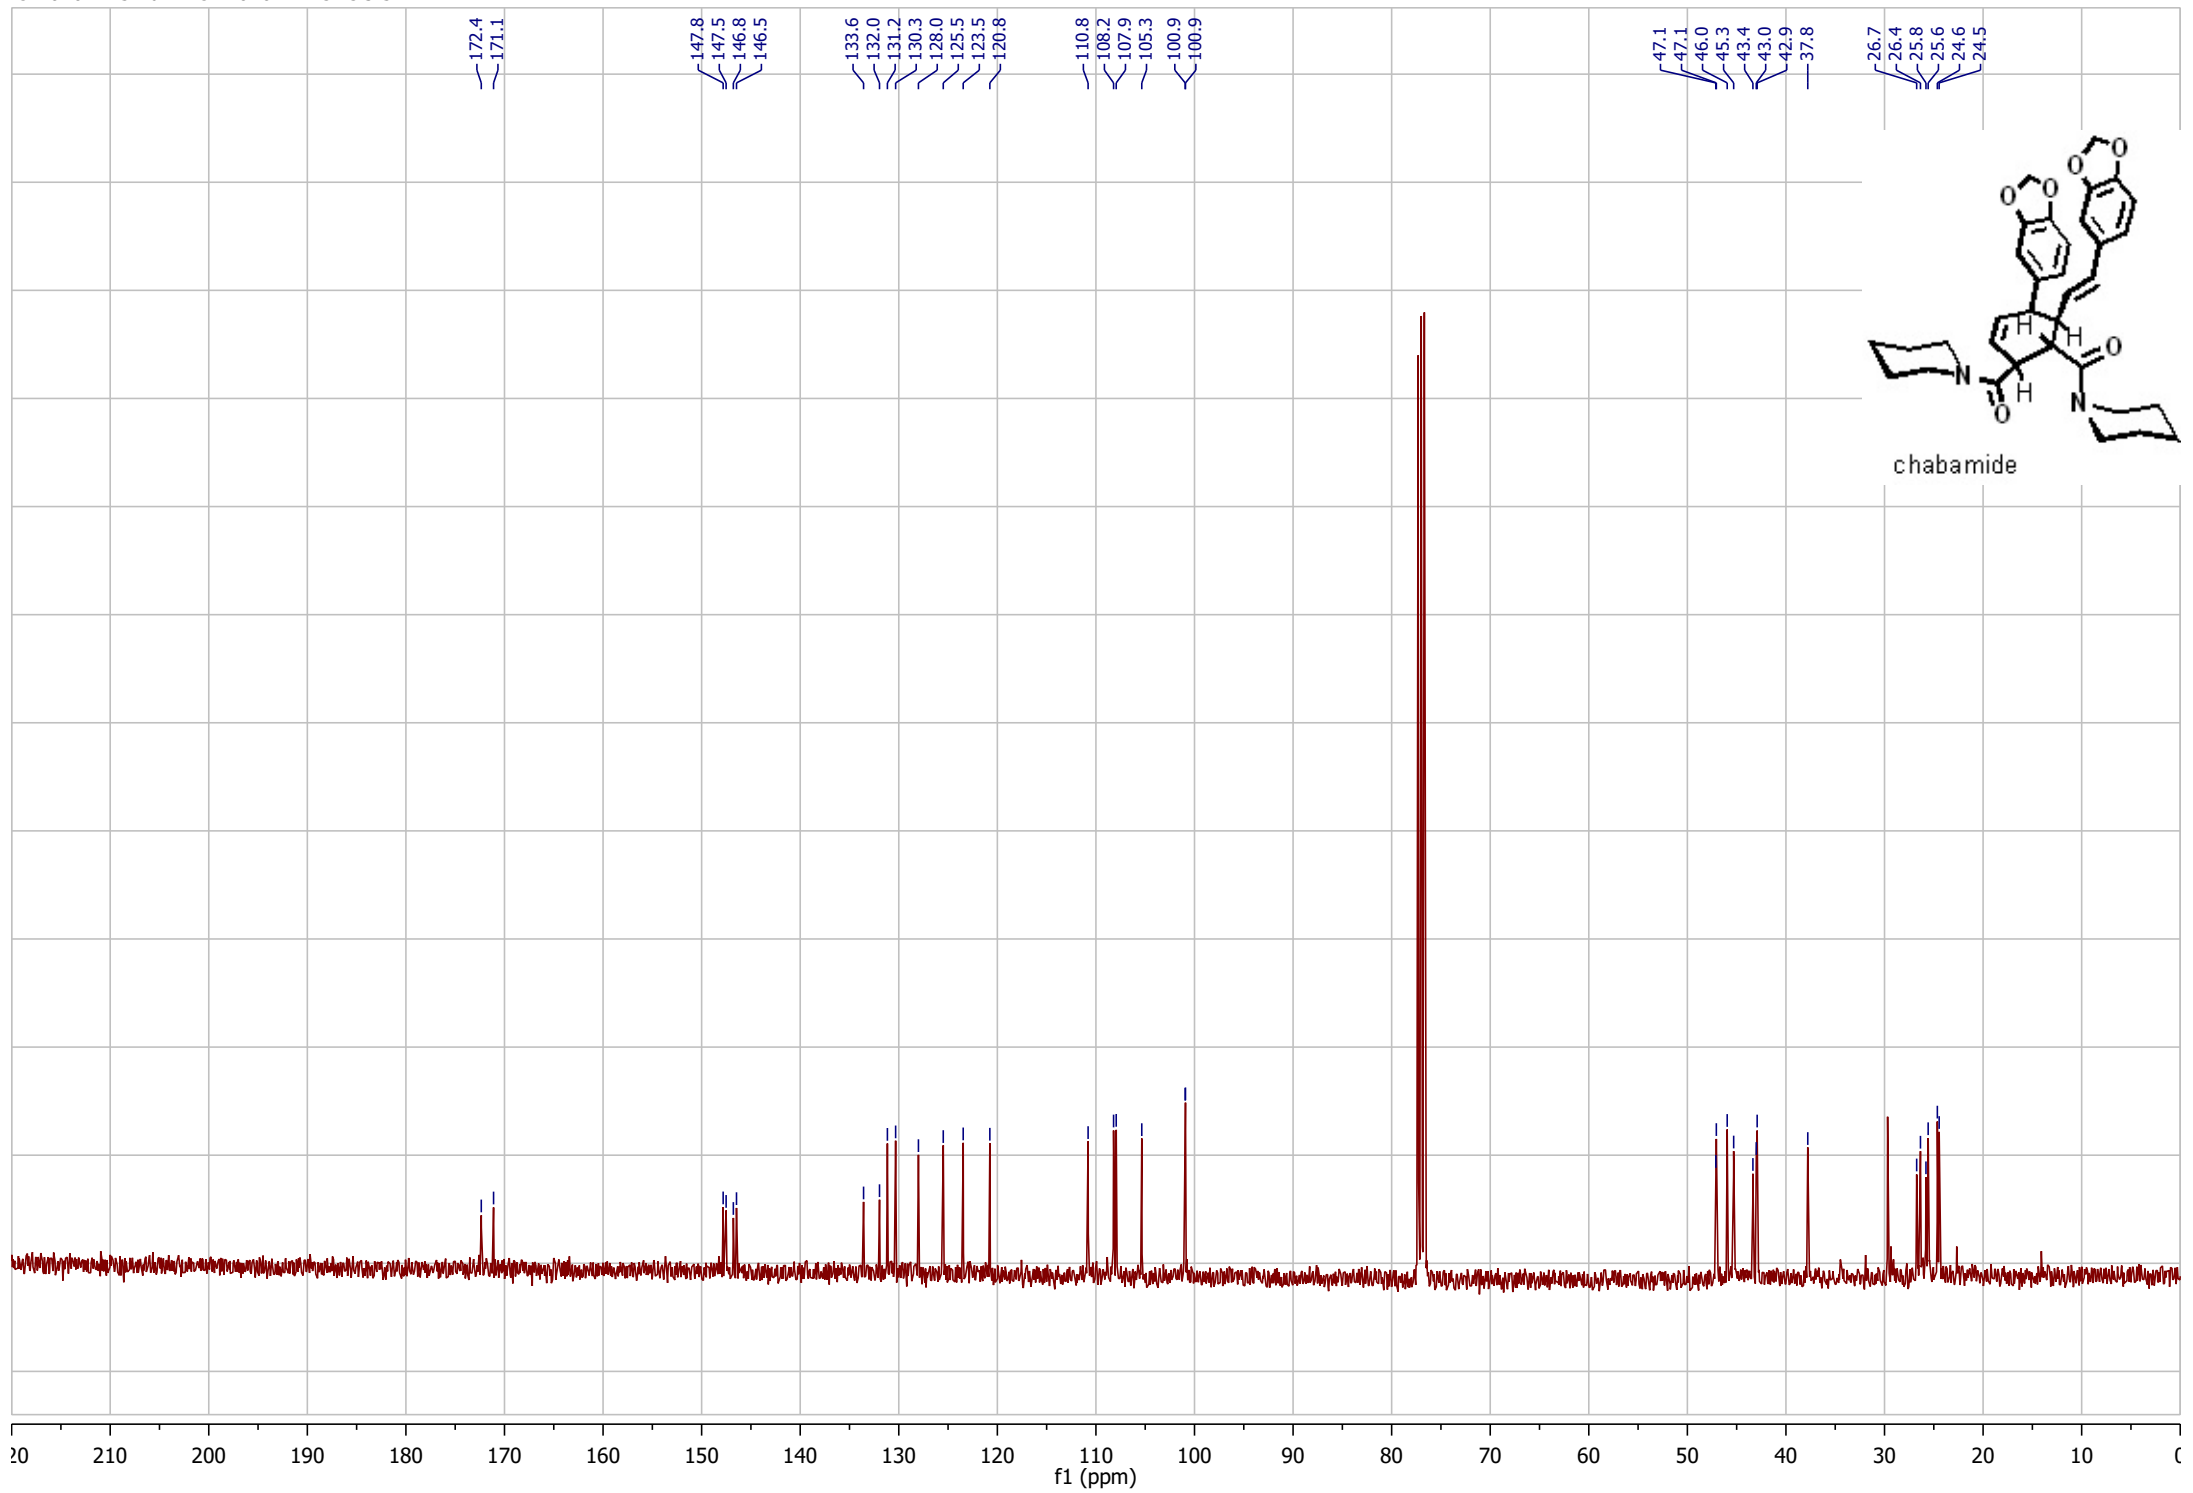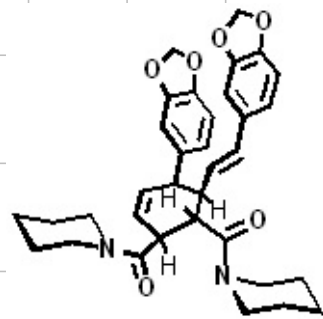

chabamide

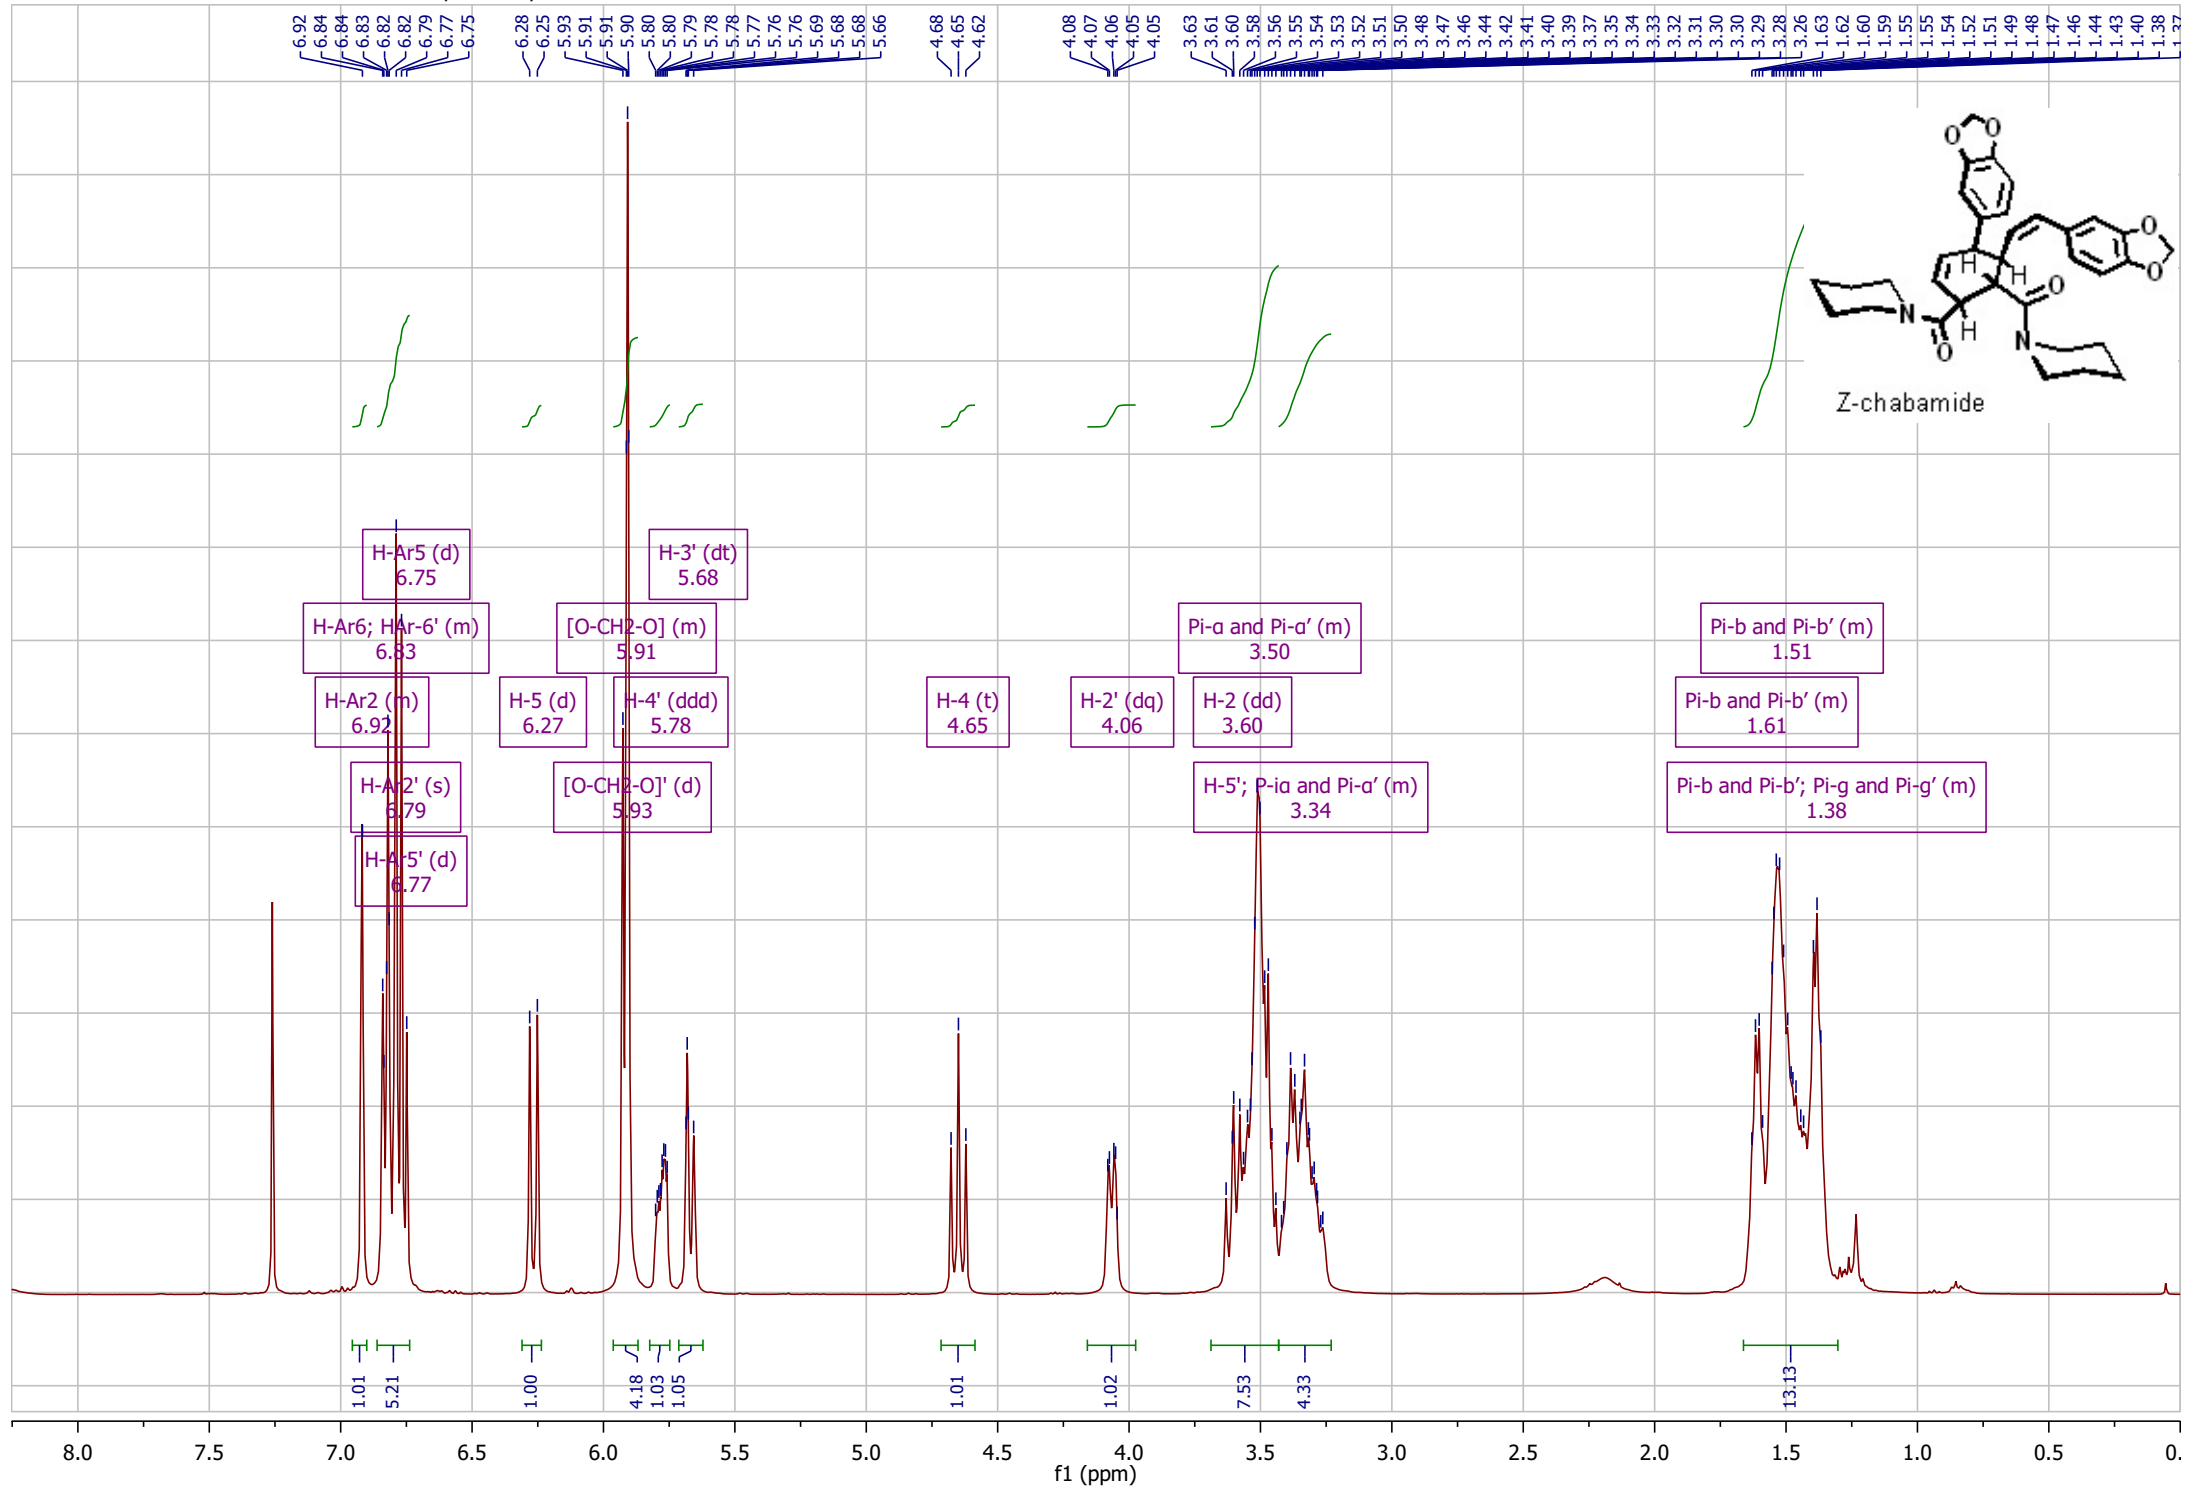

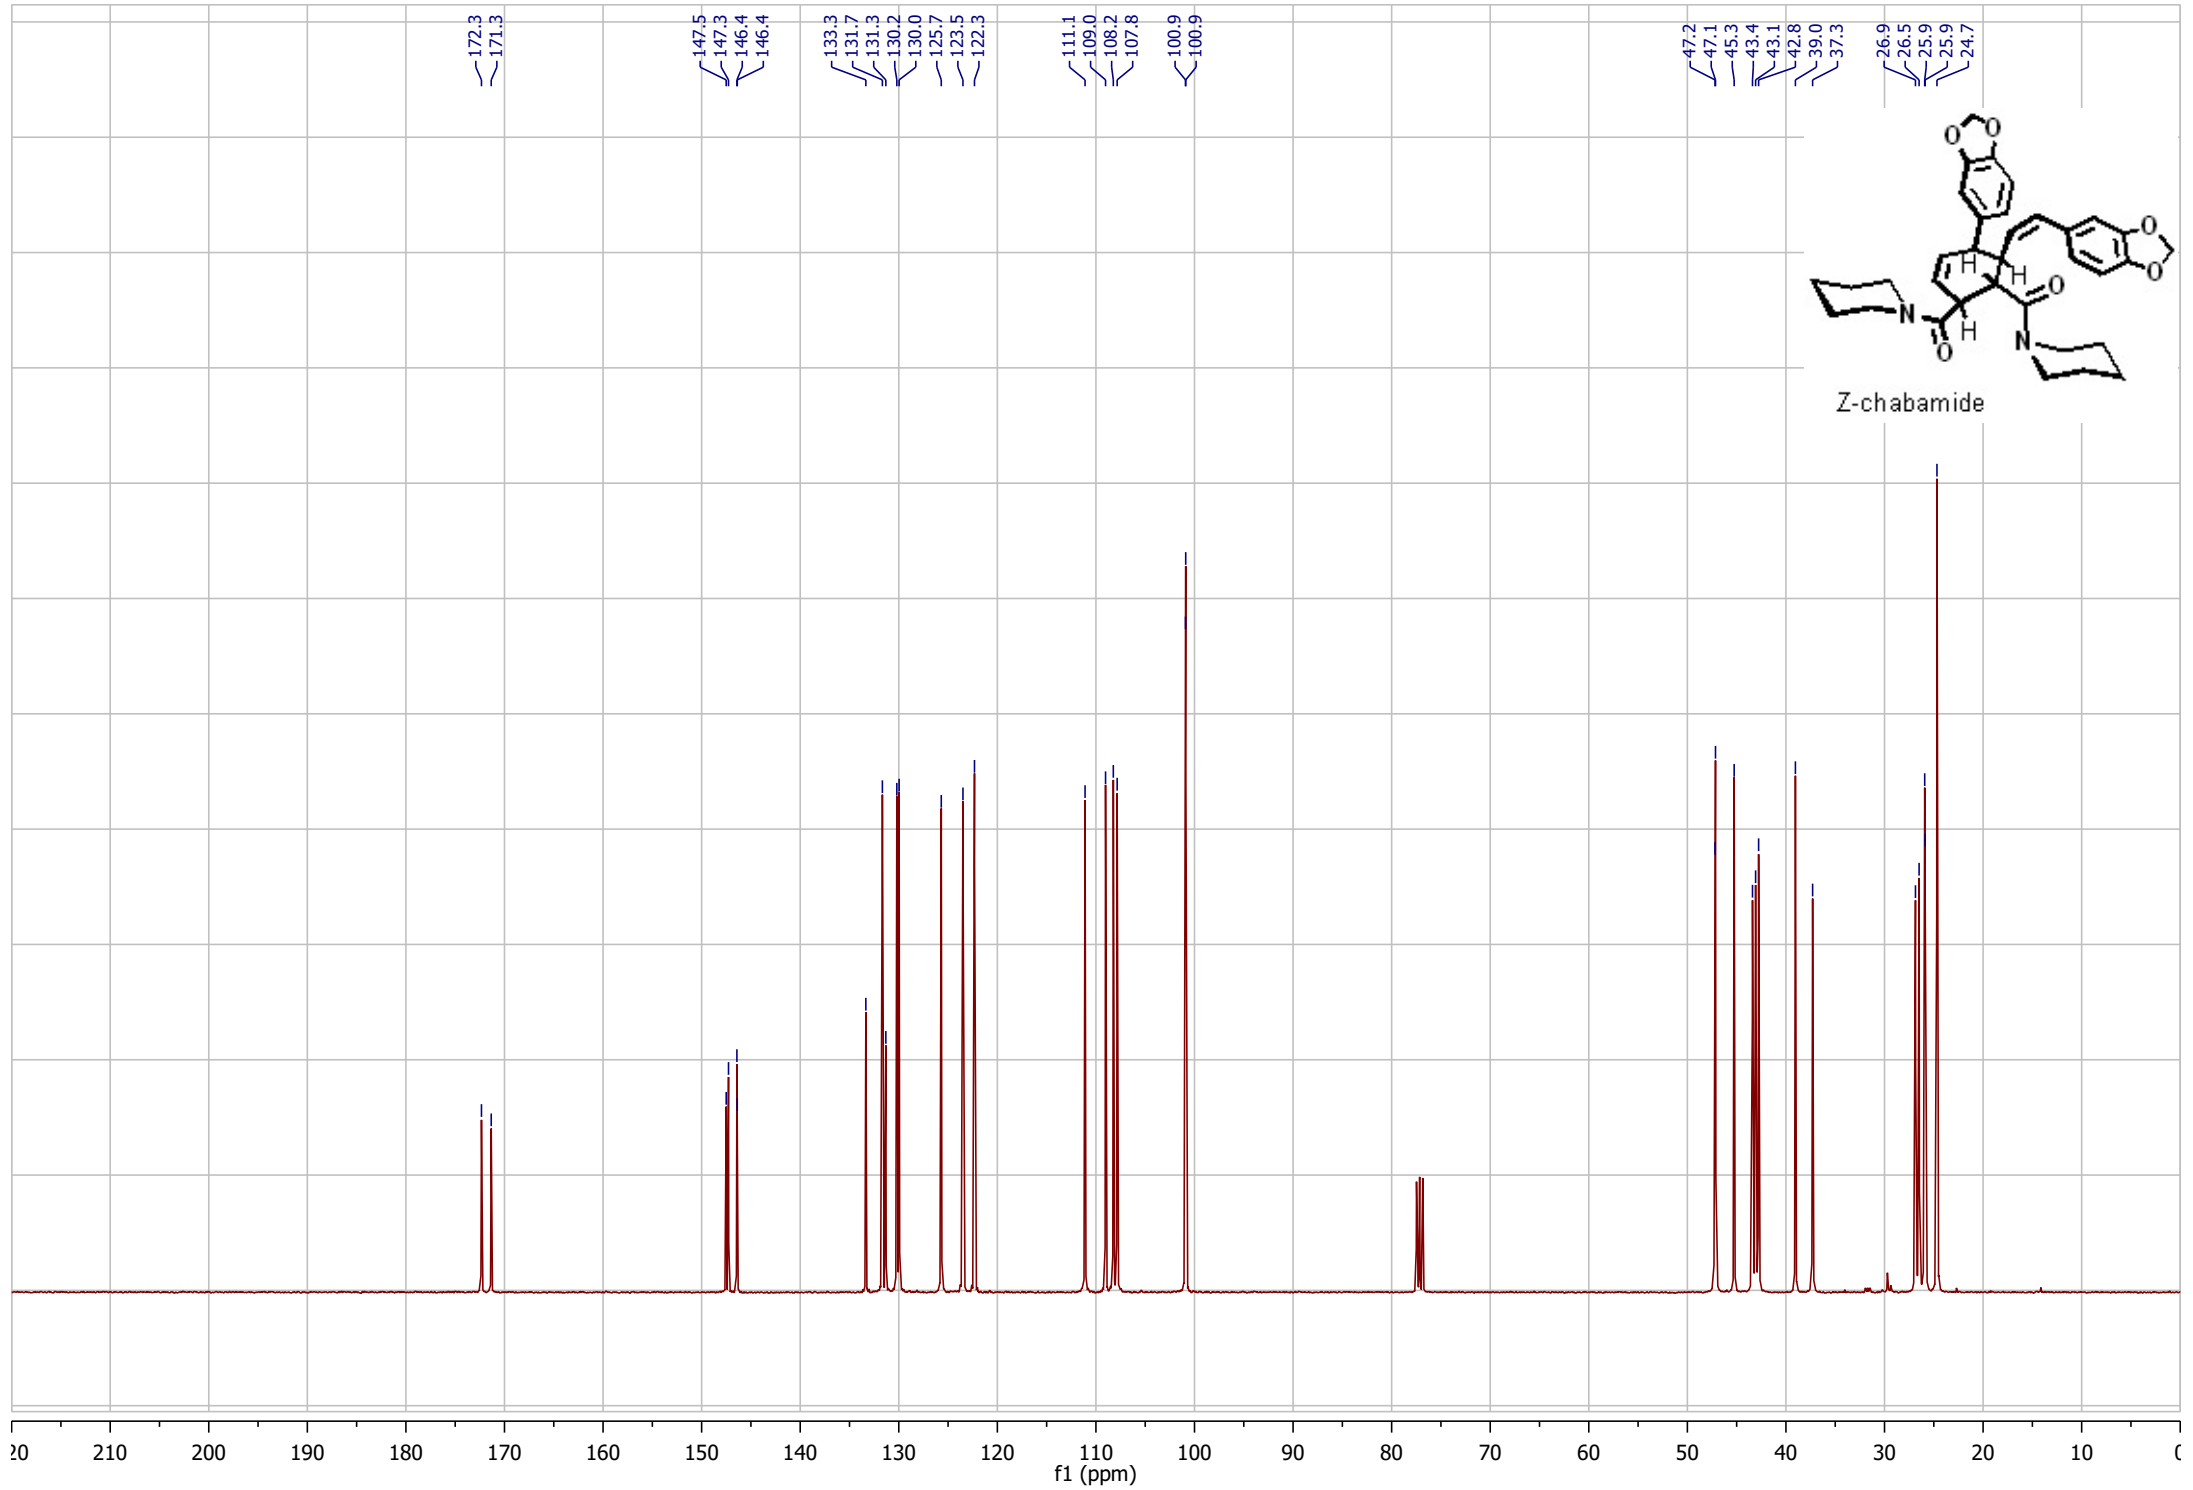

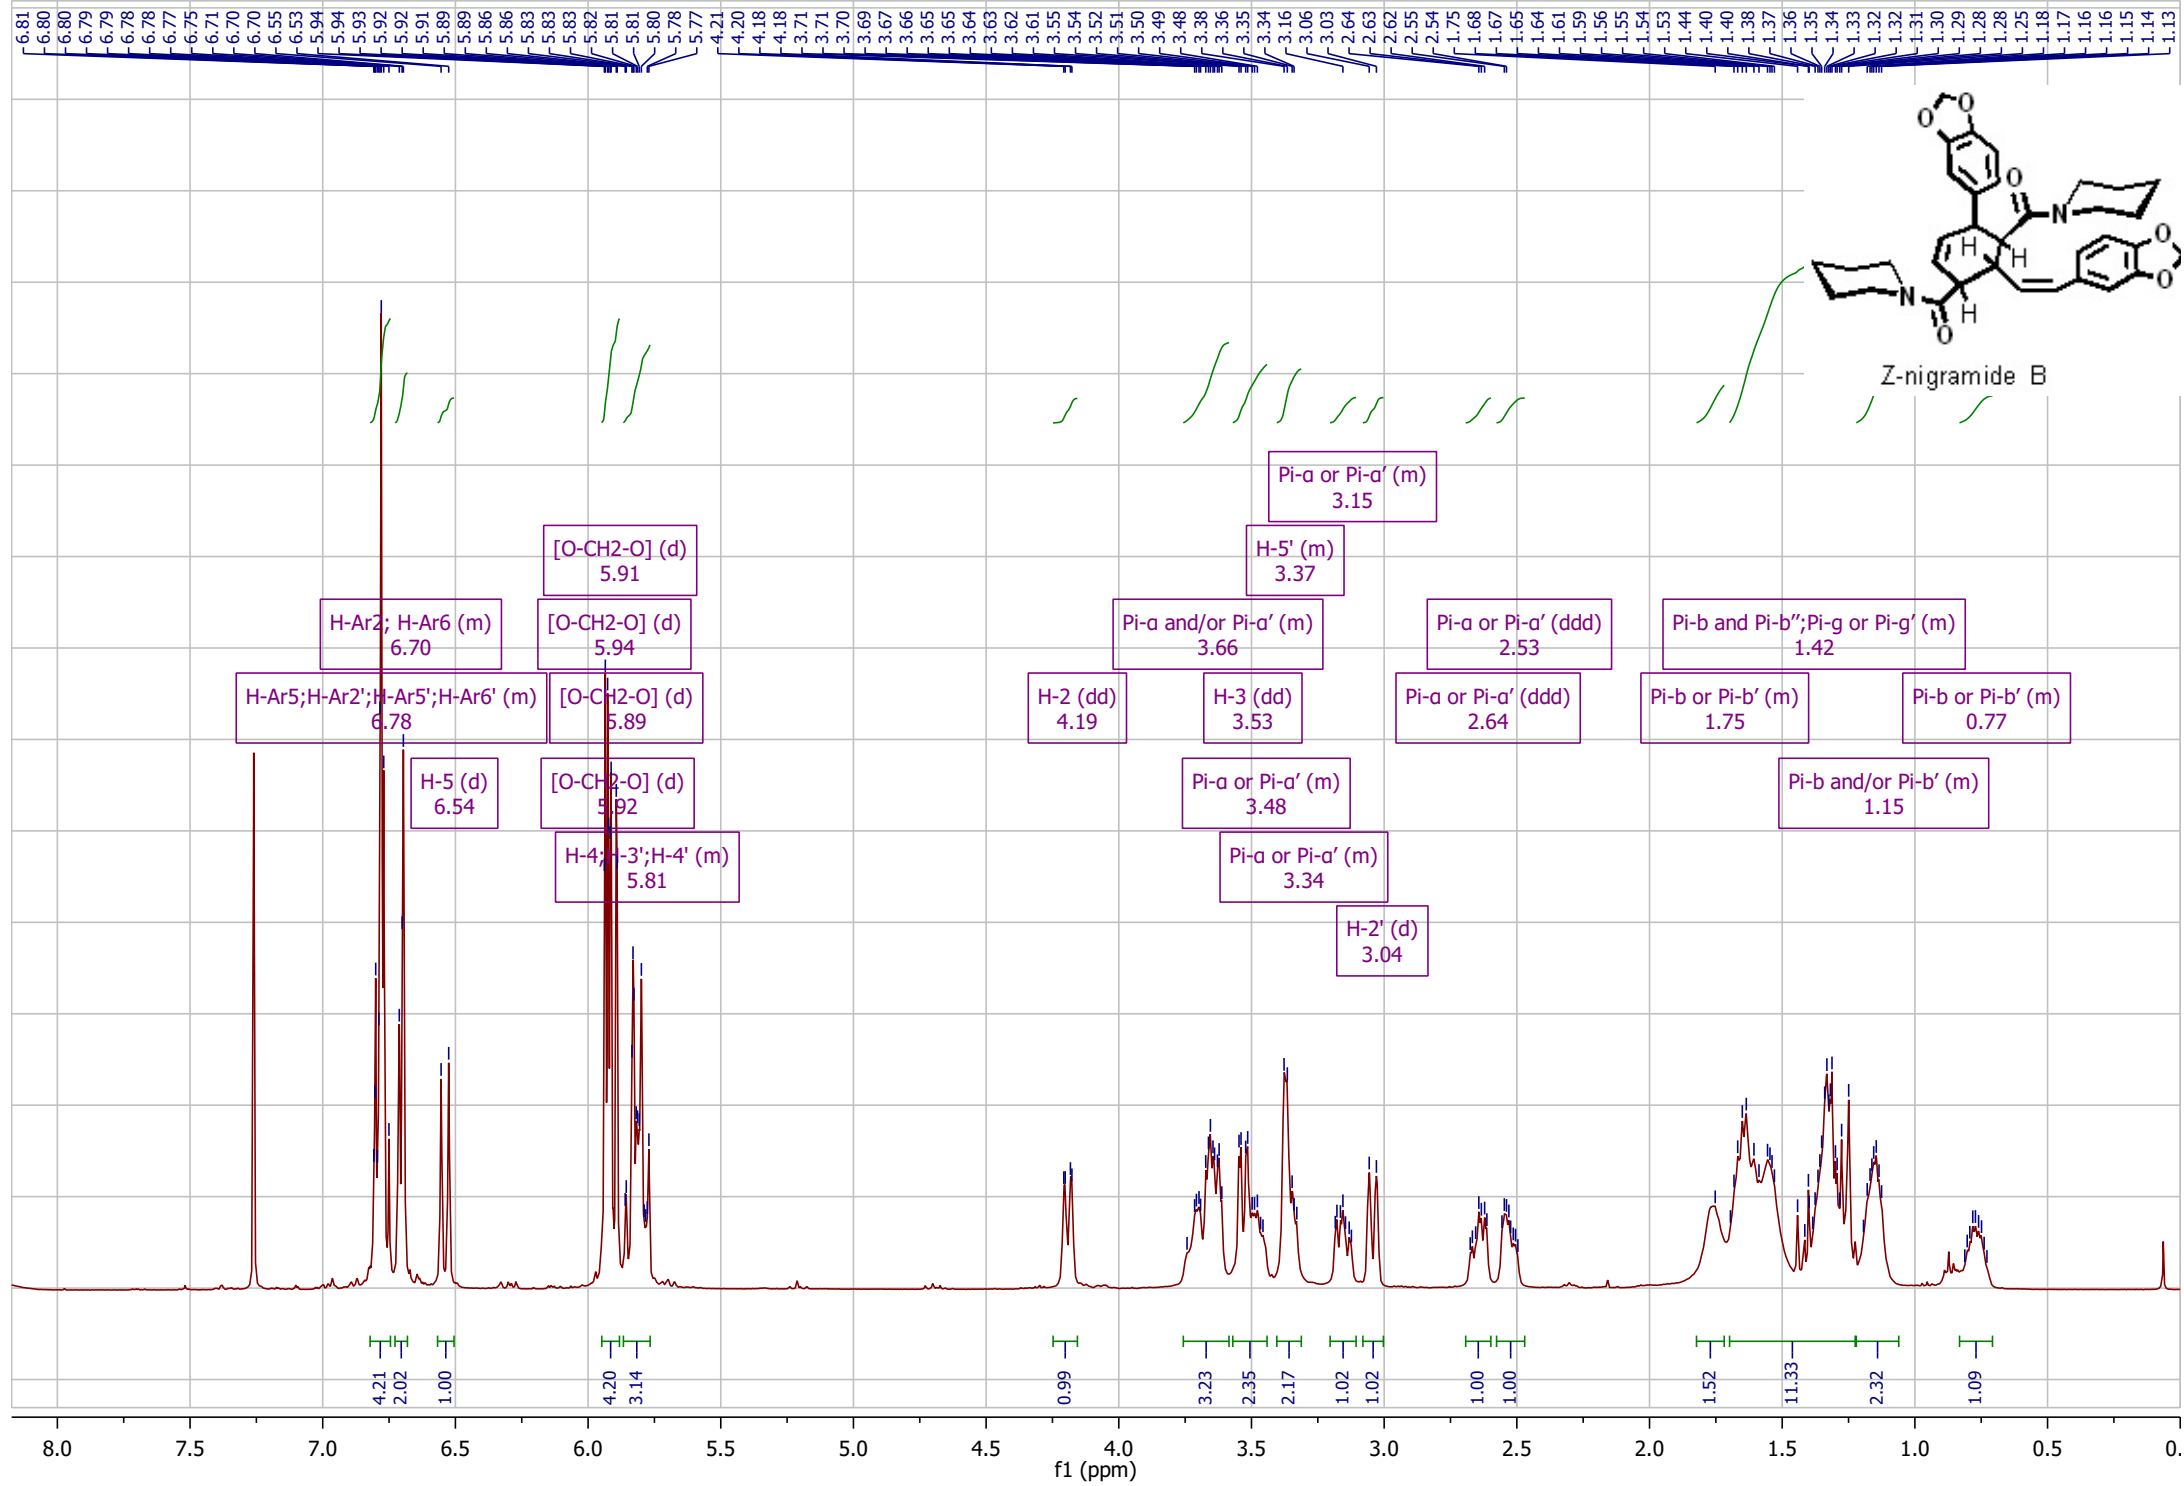

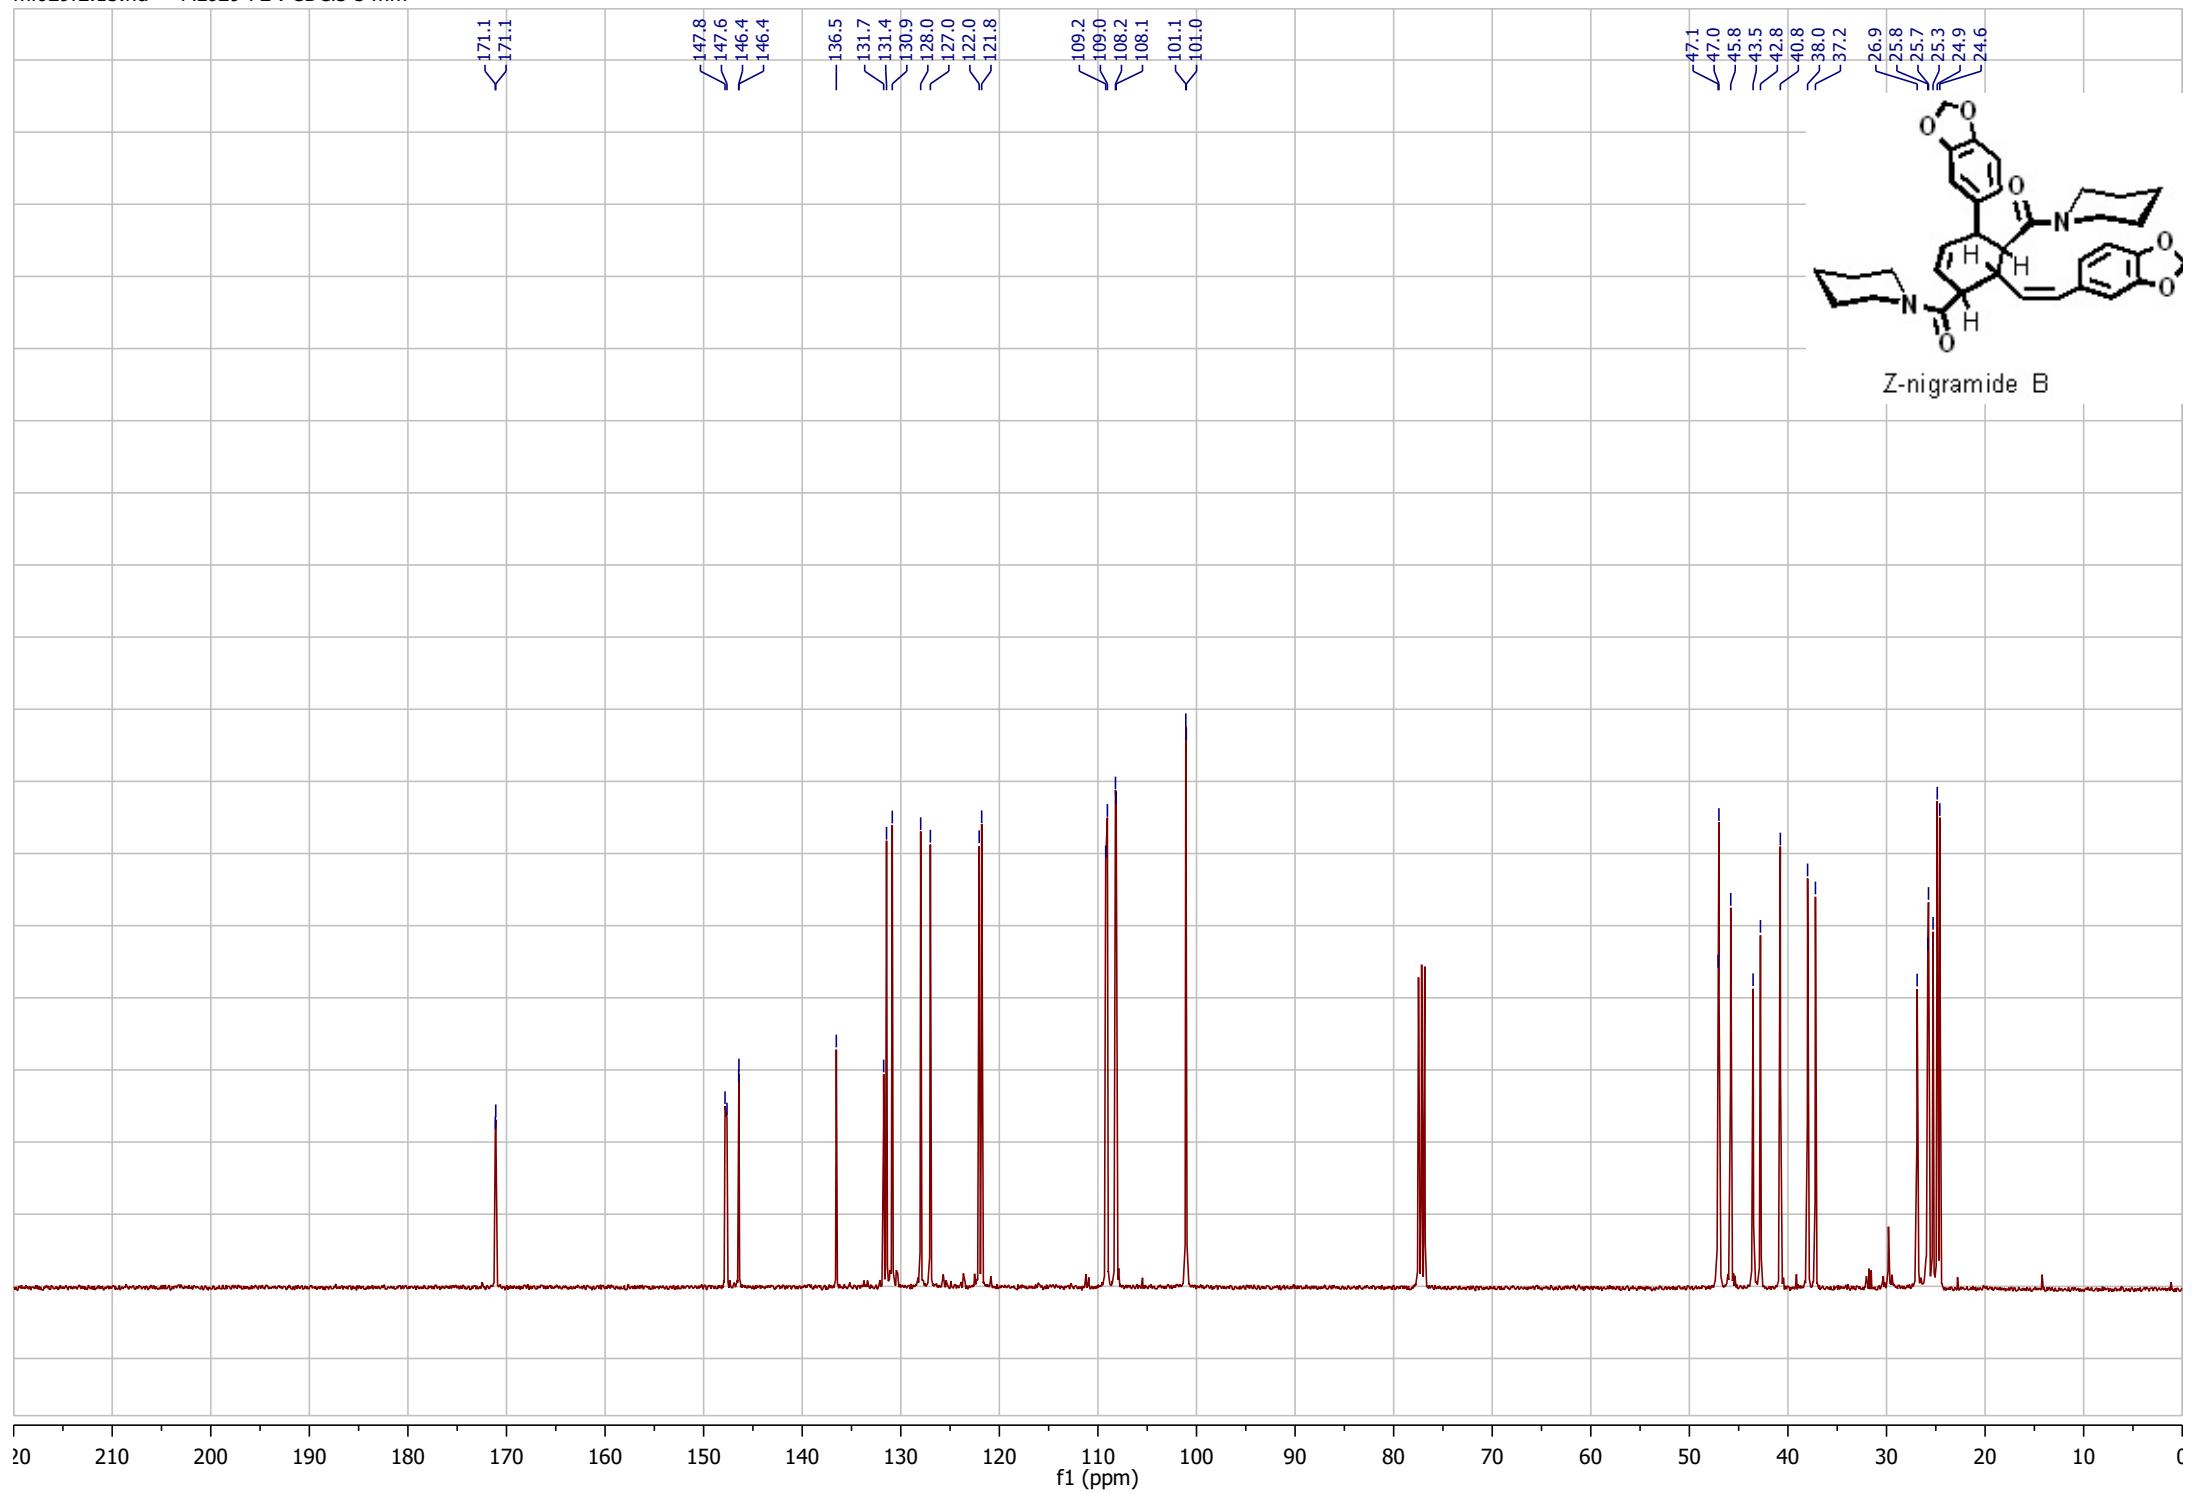

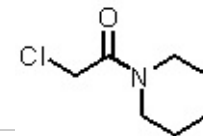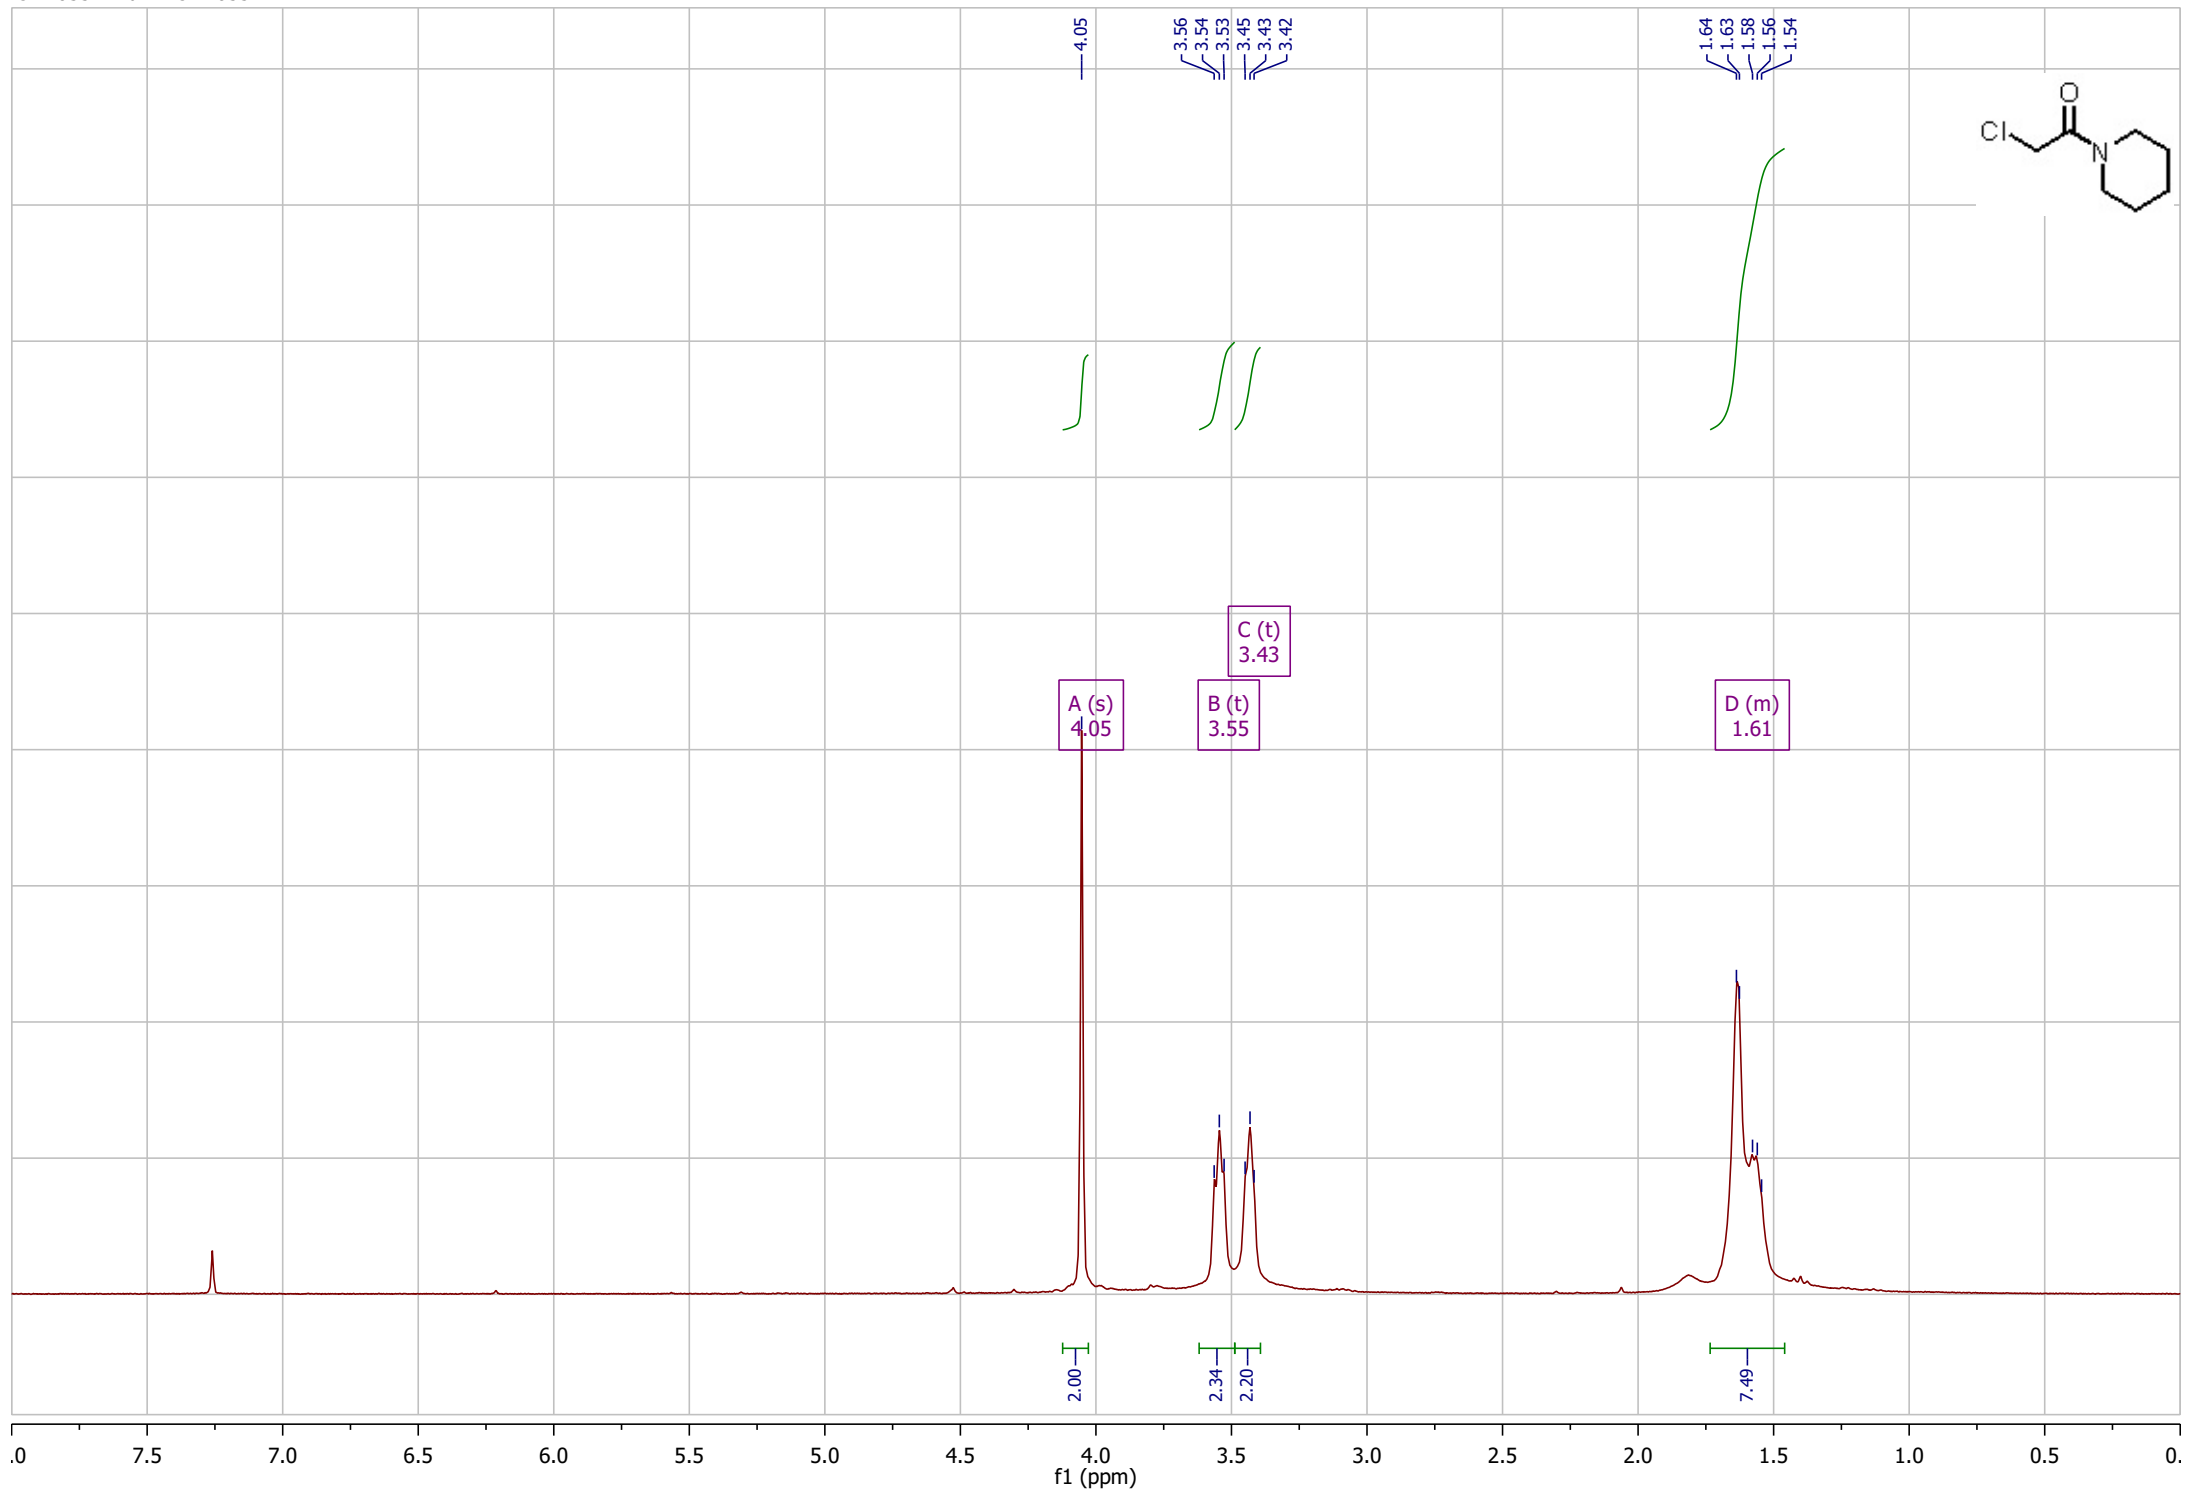

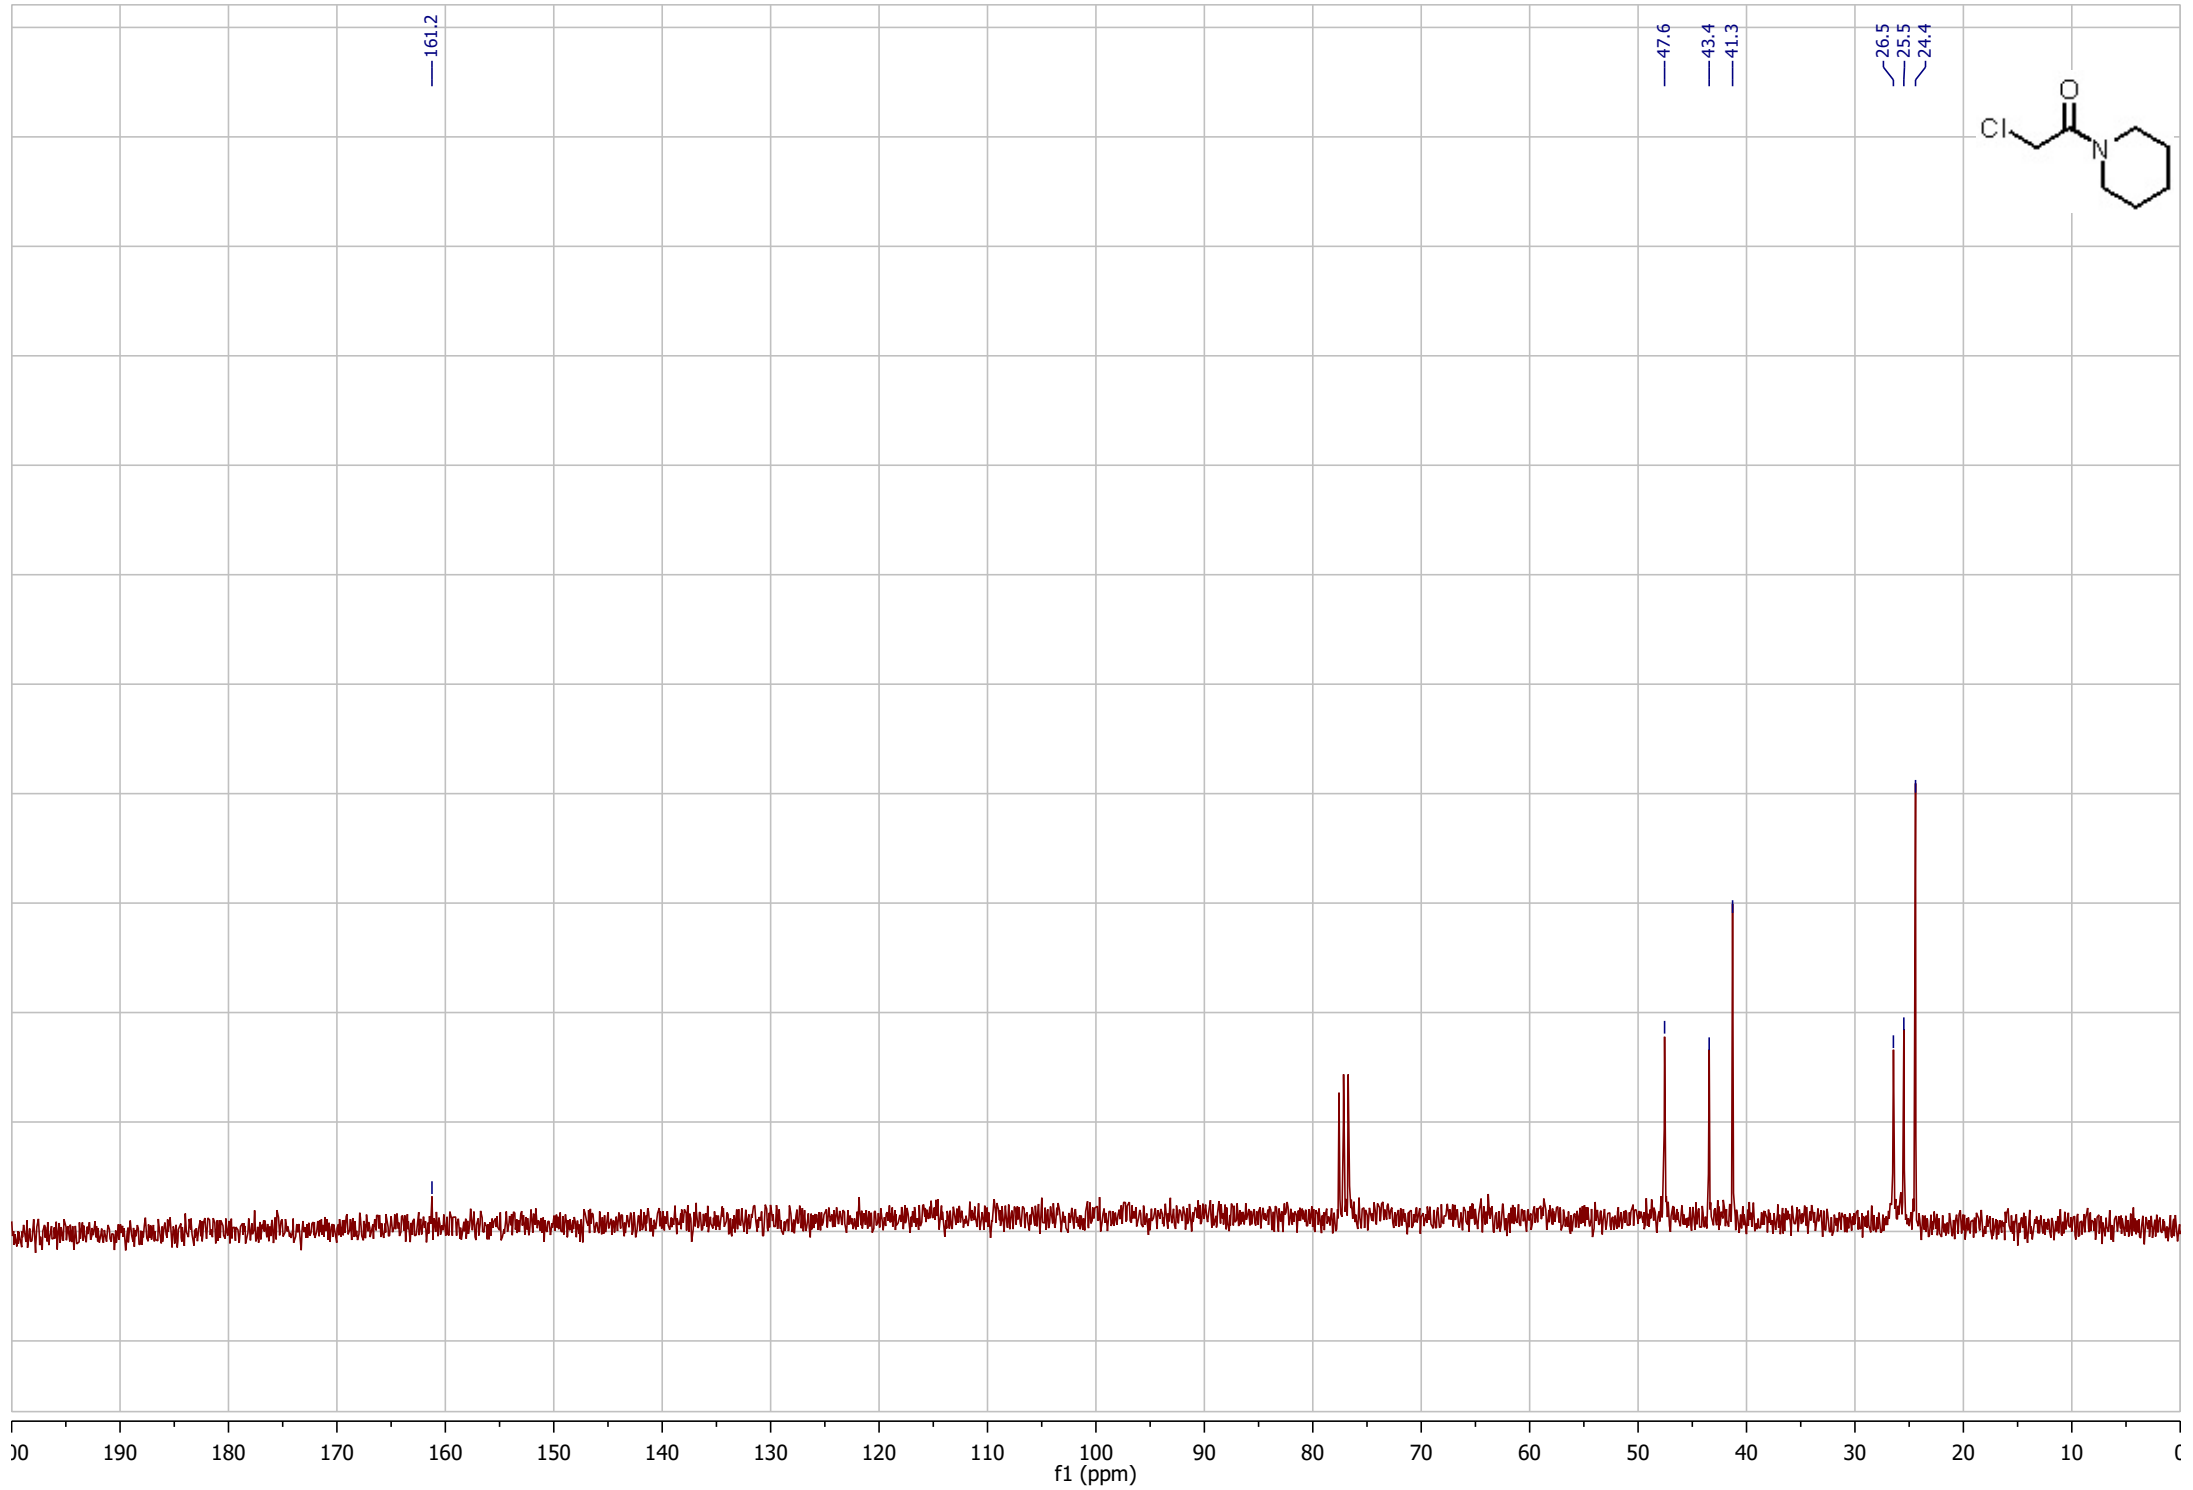

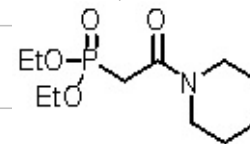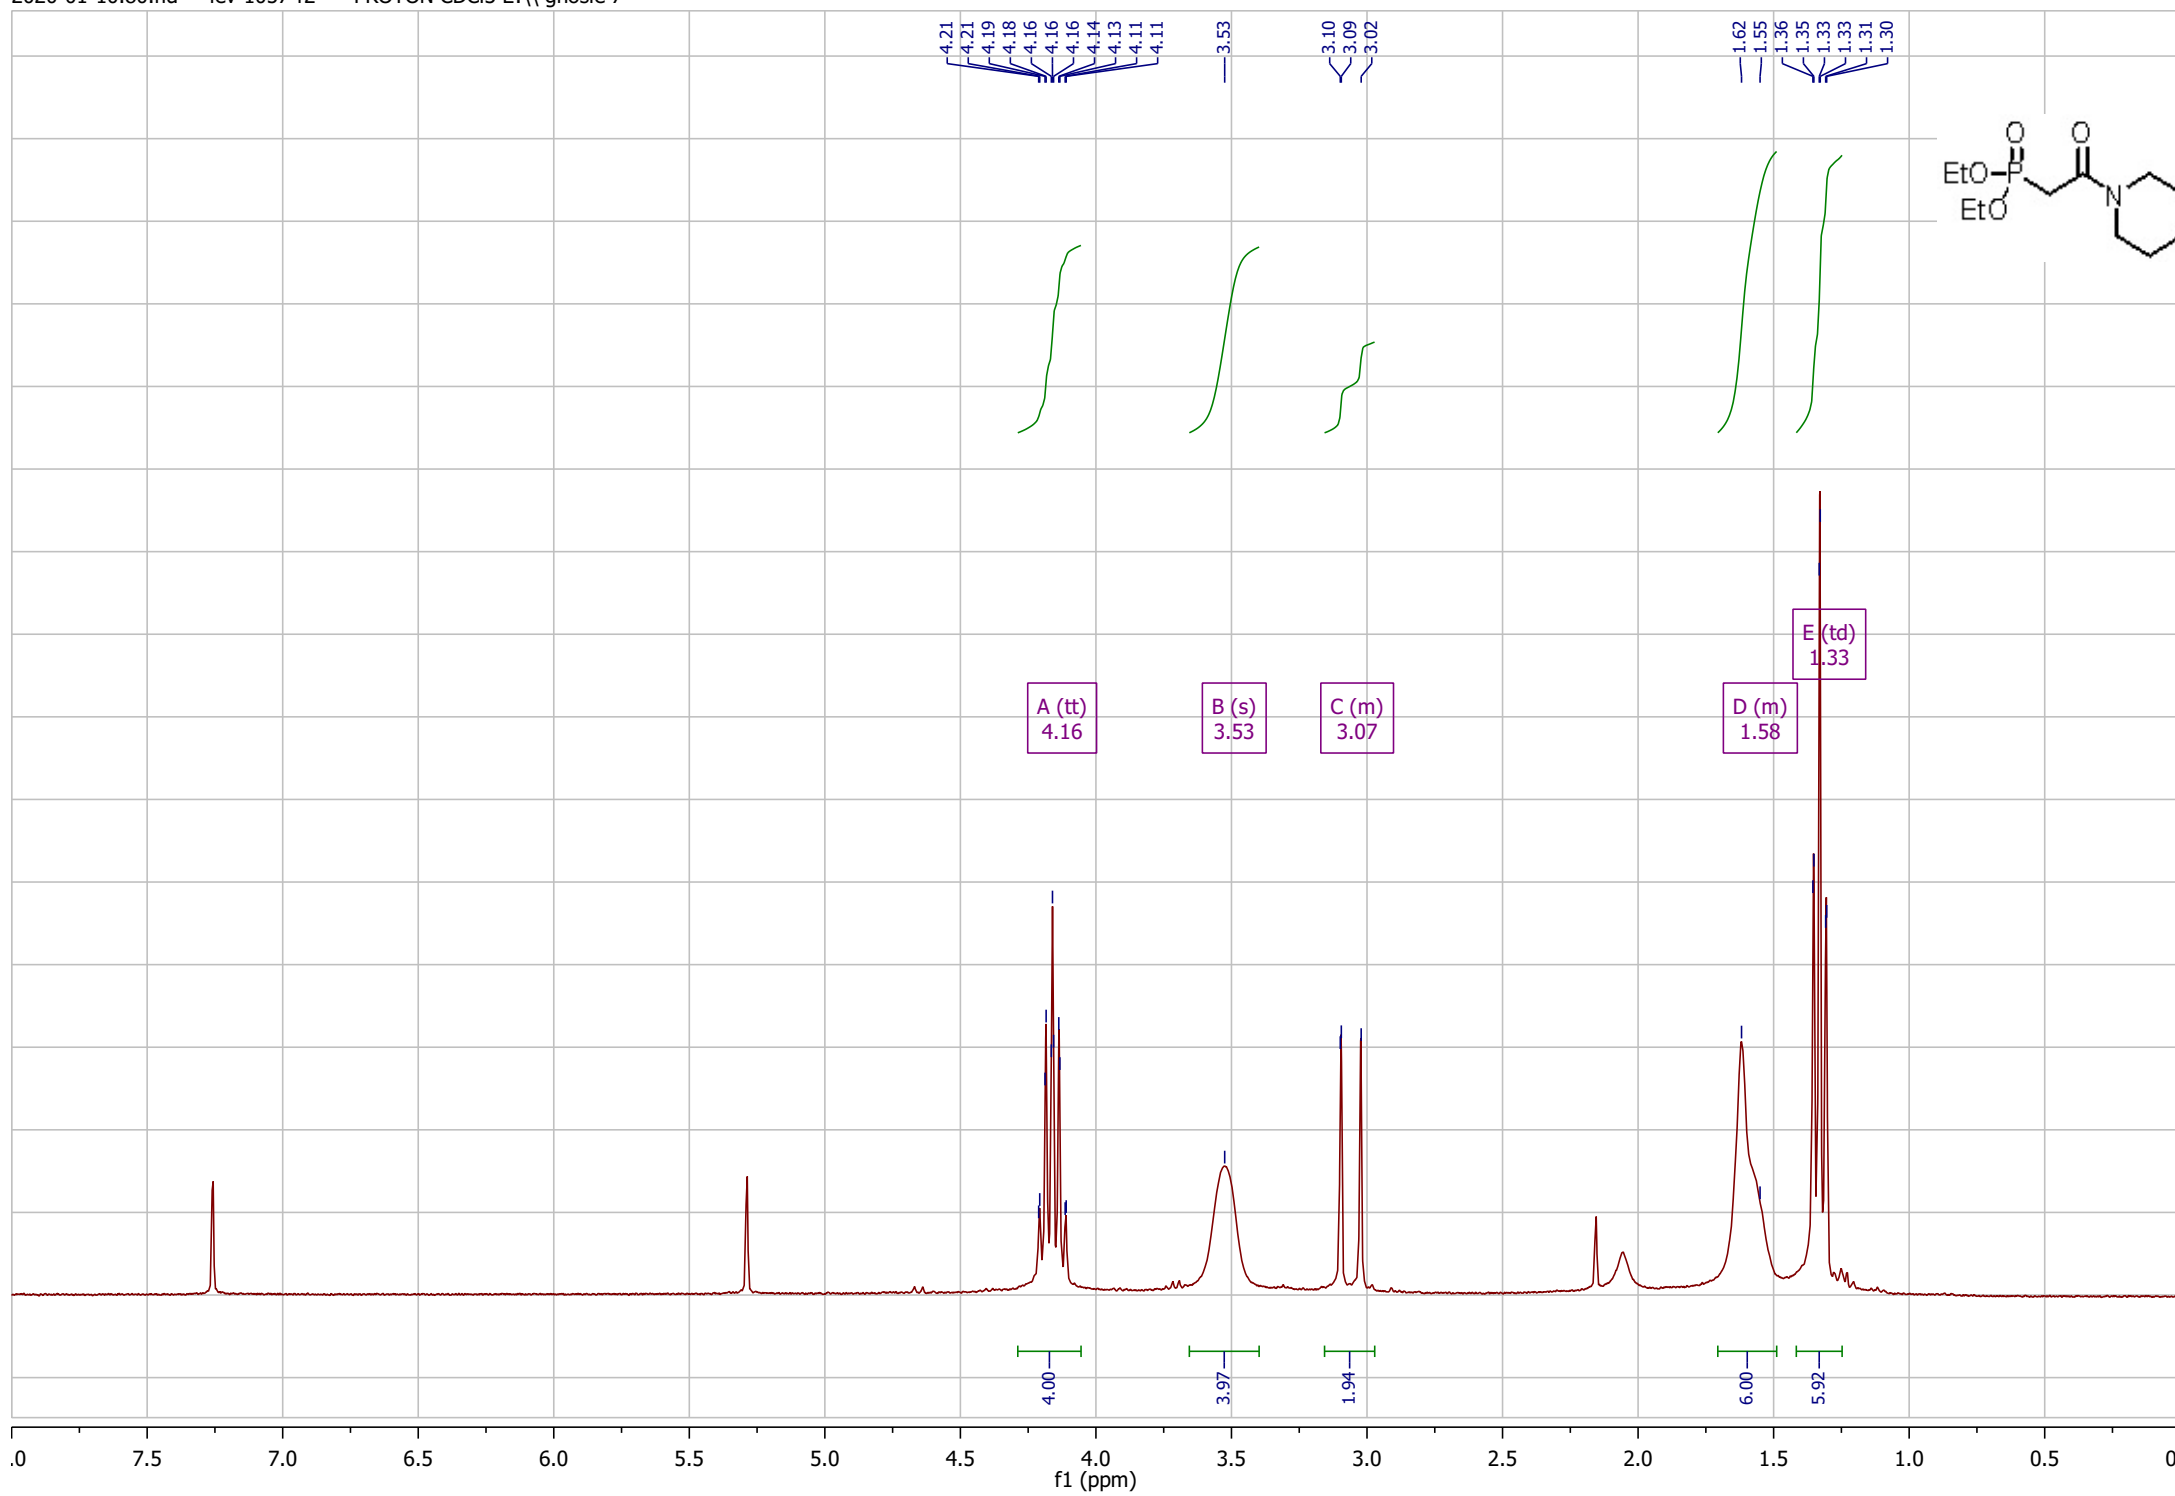

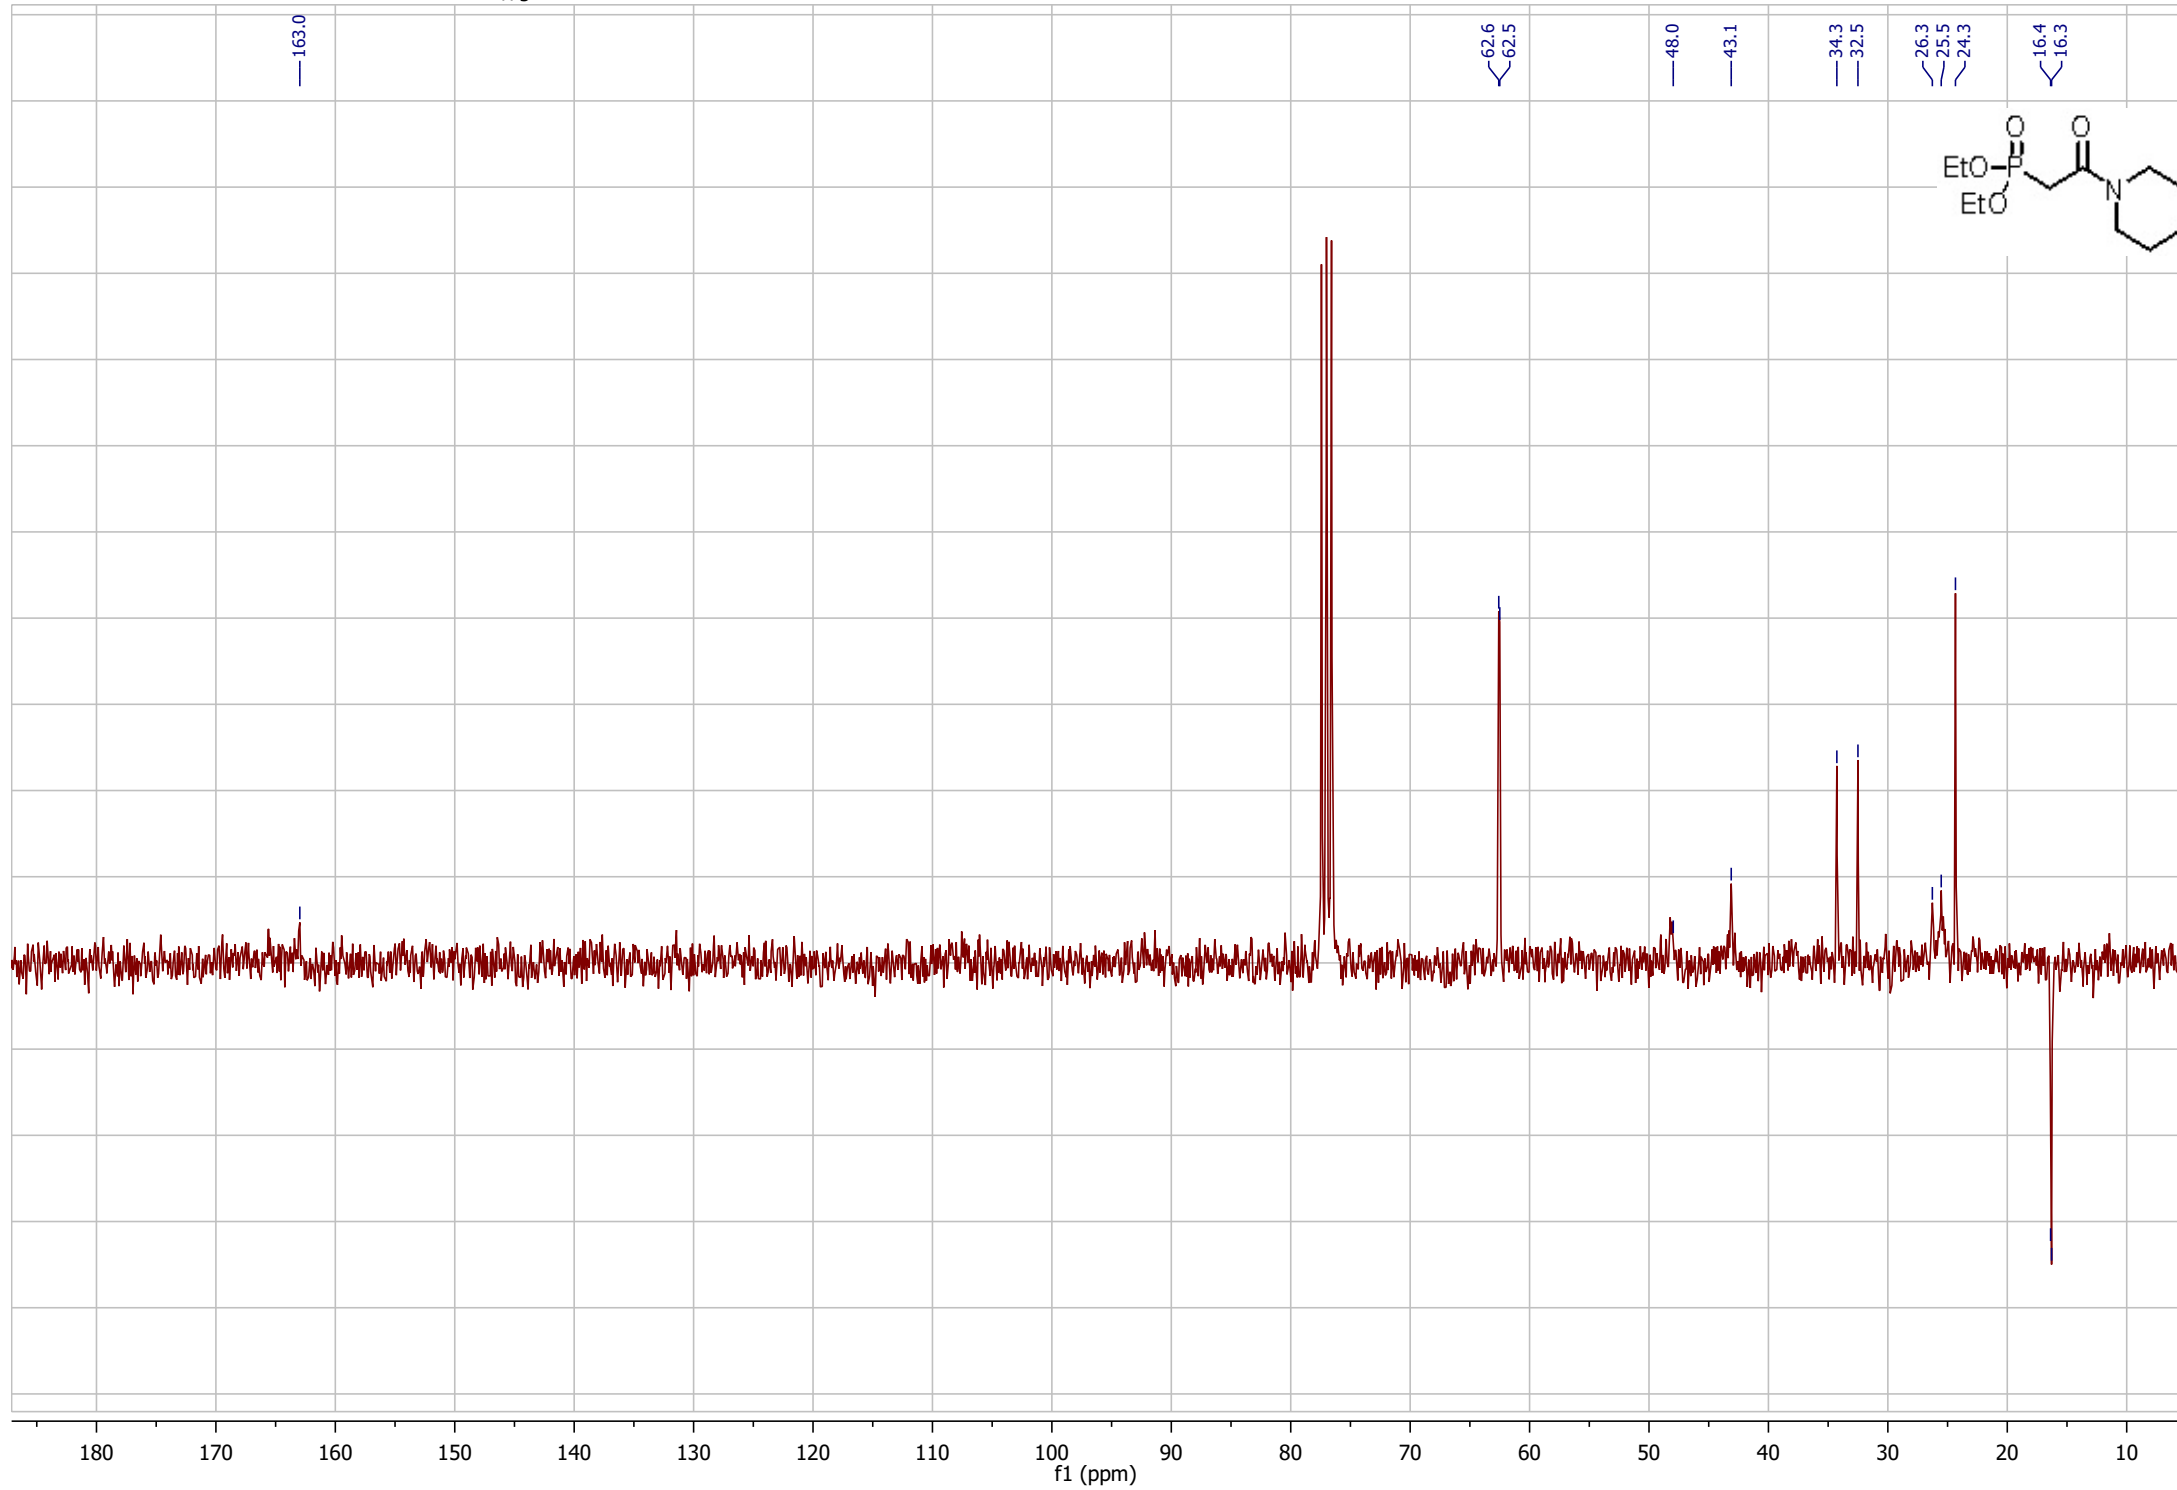

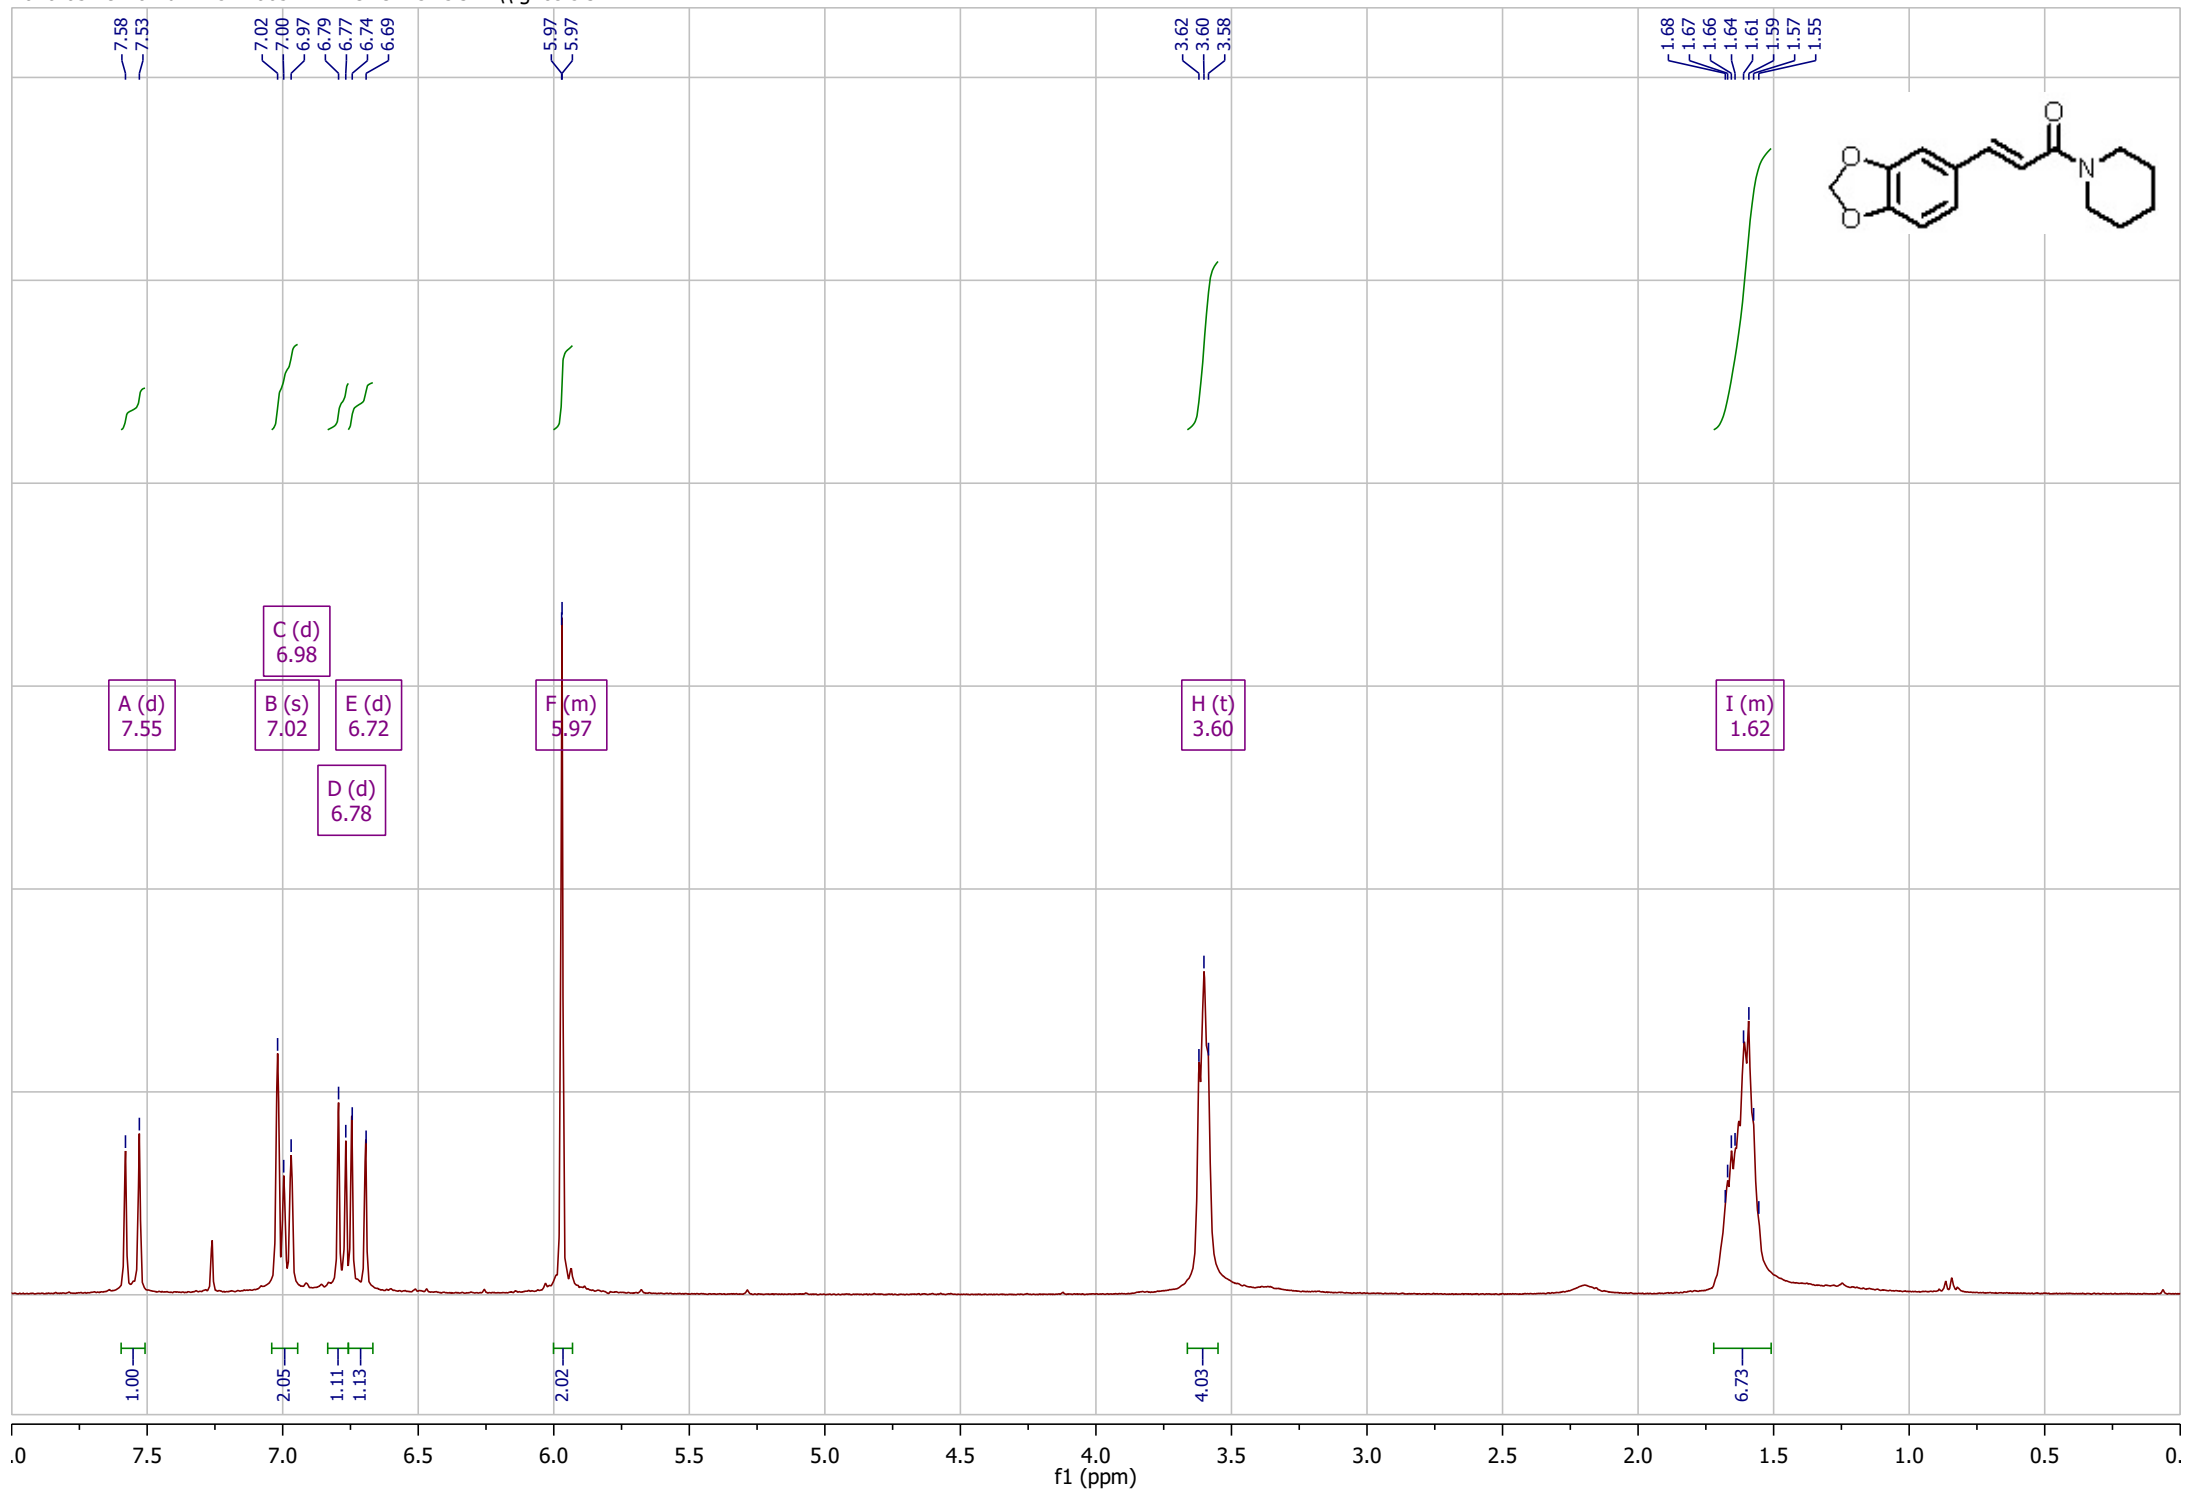

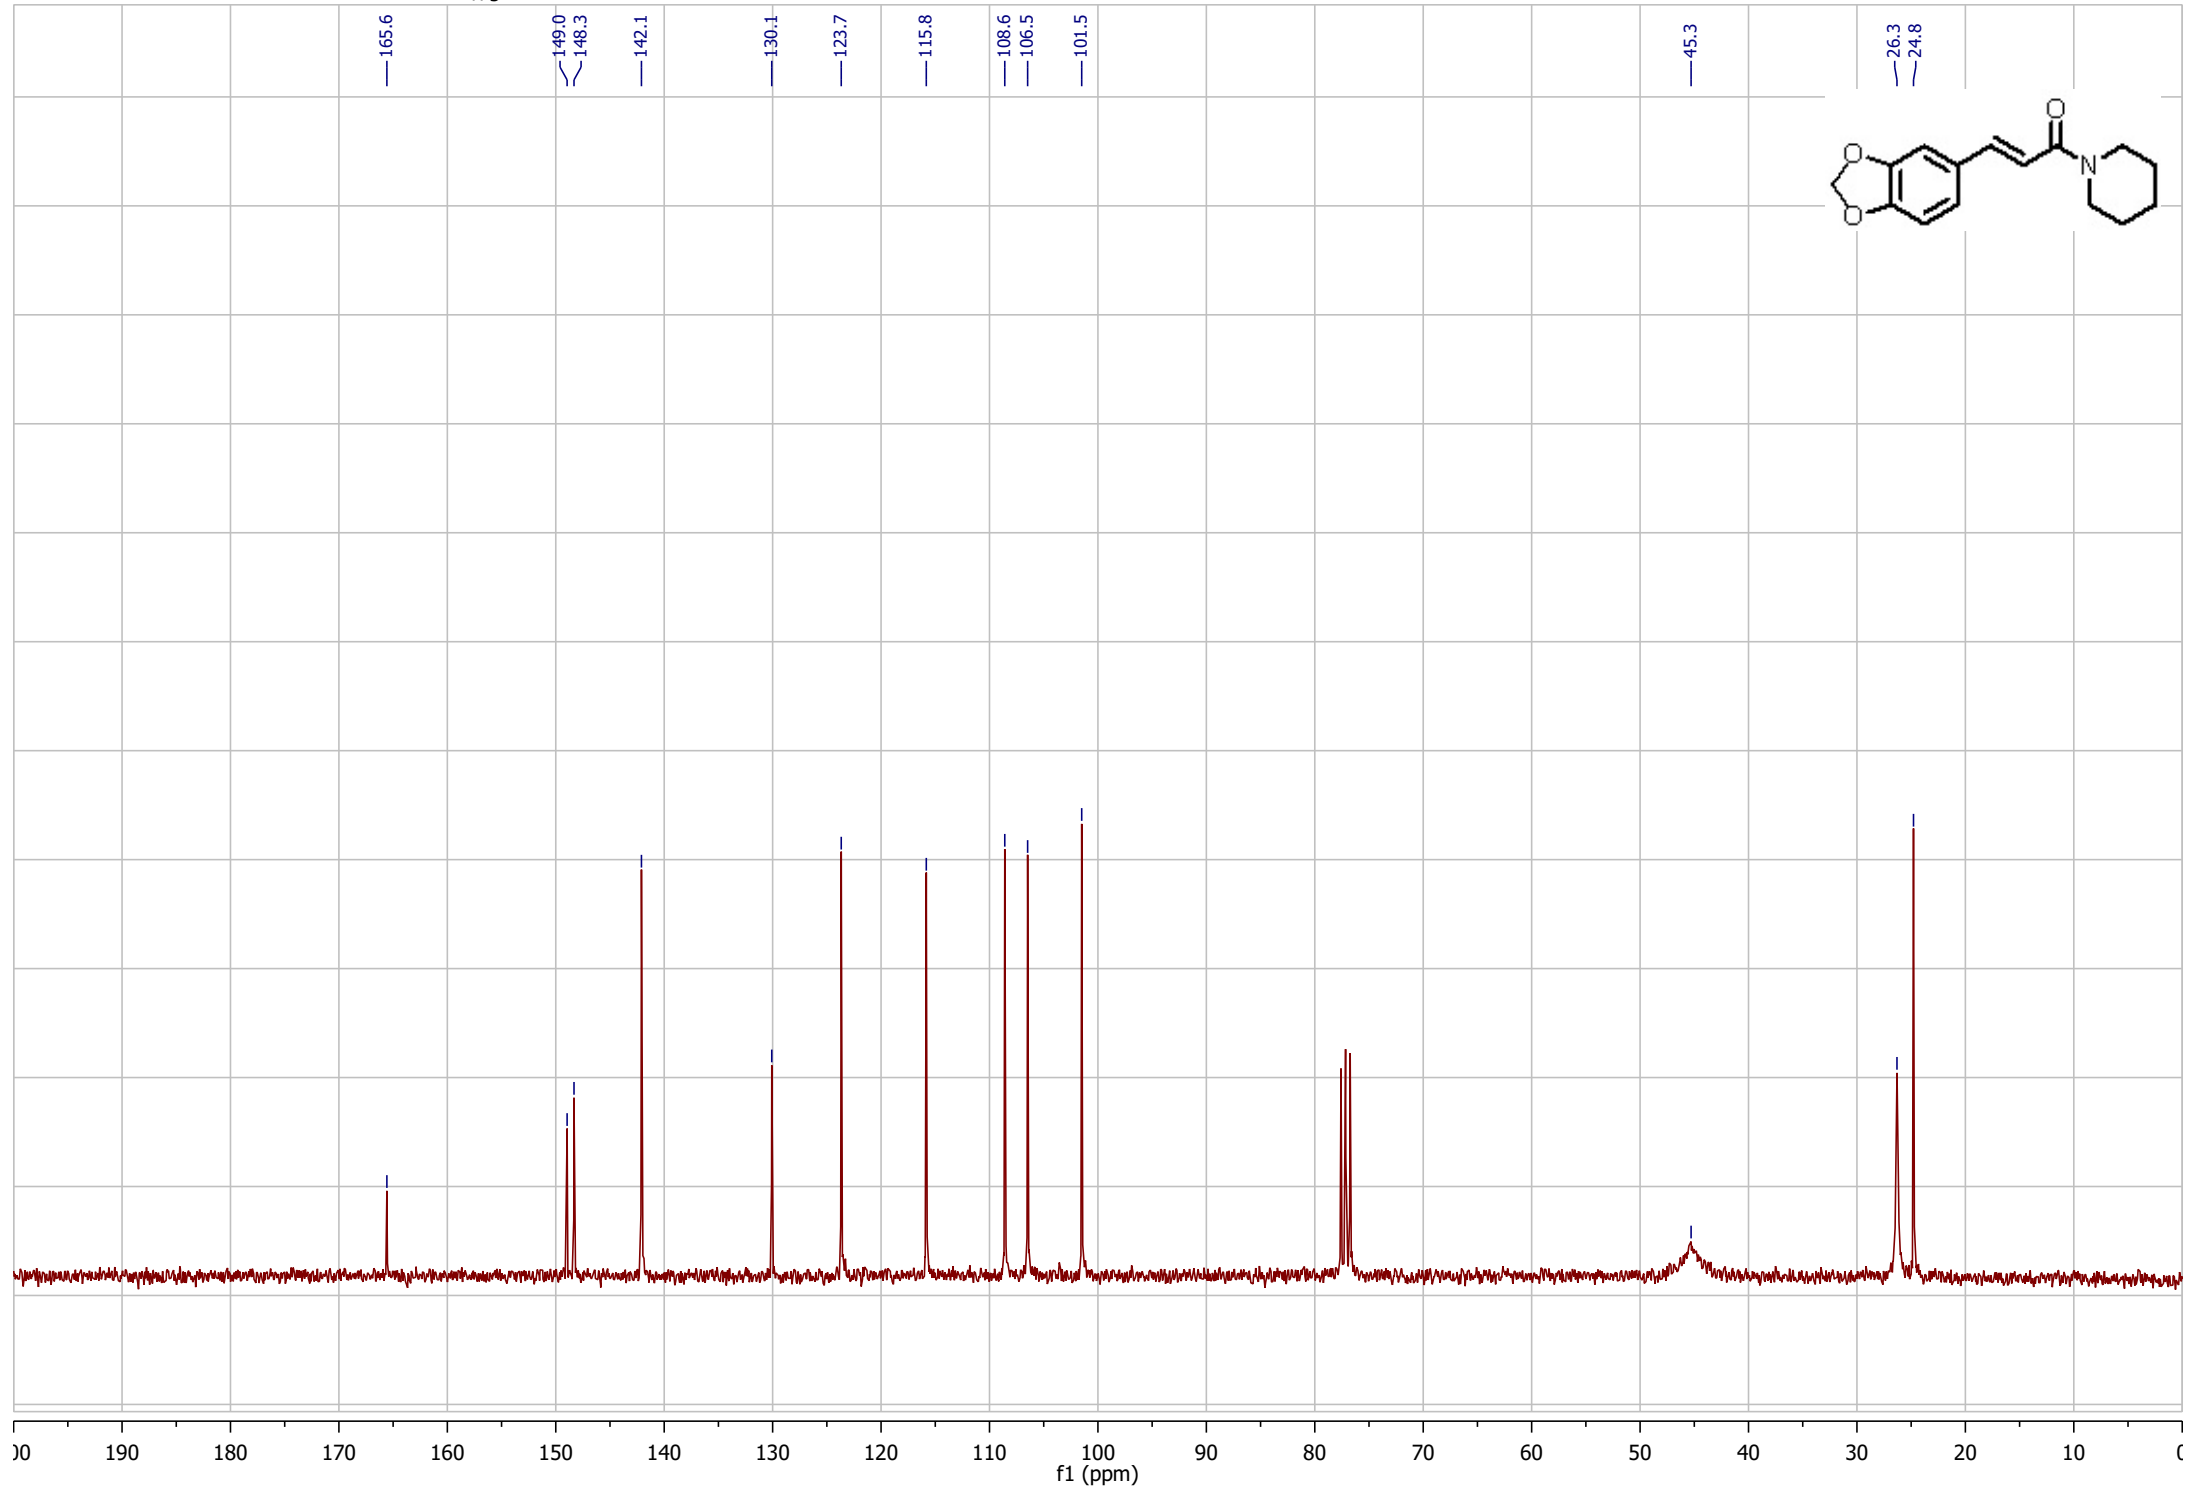

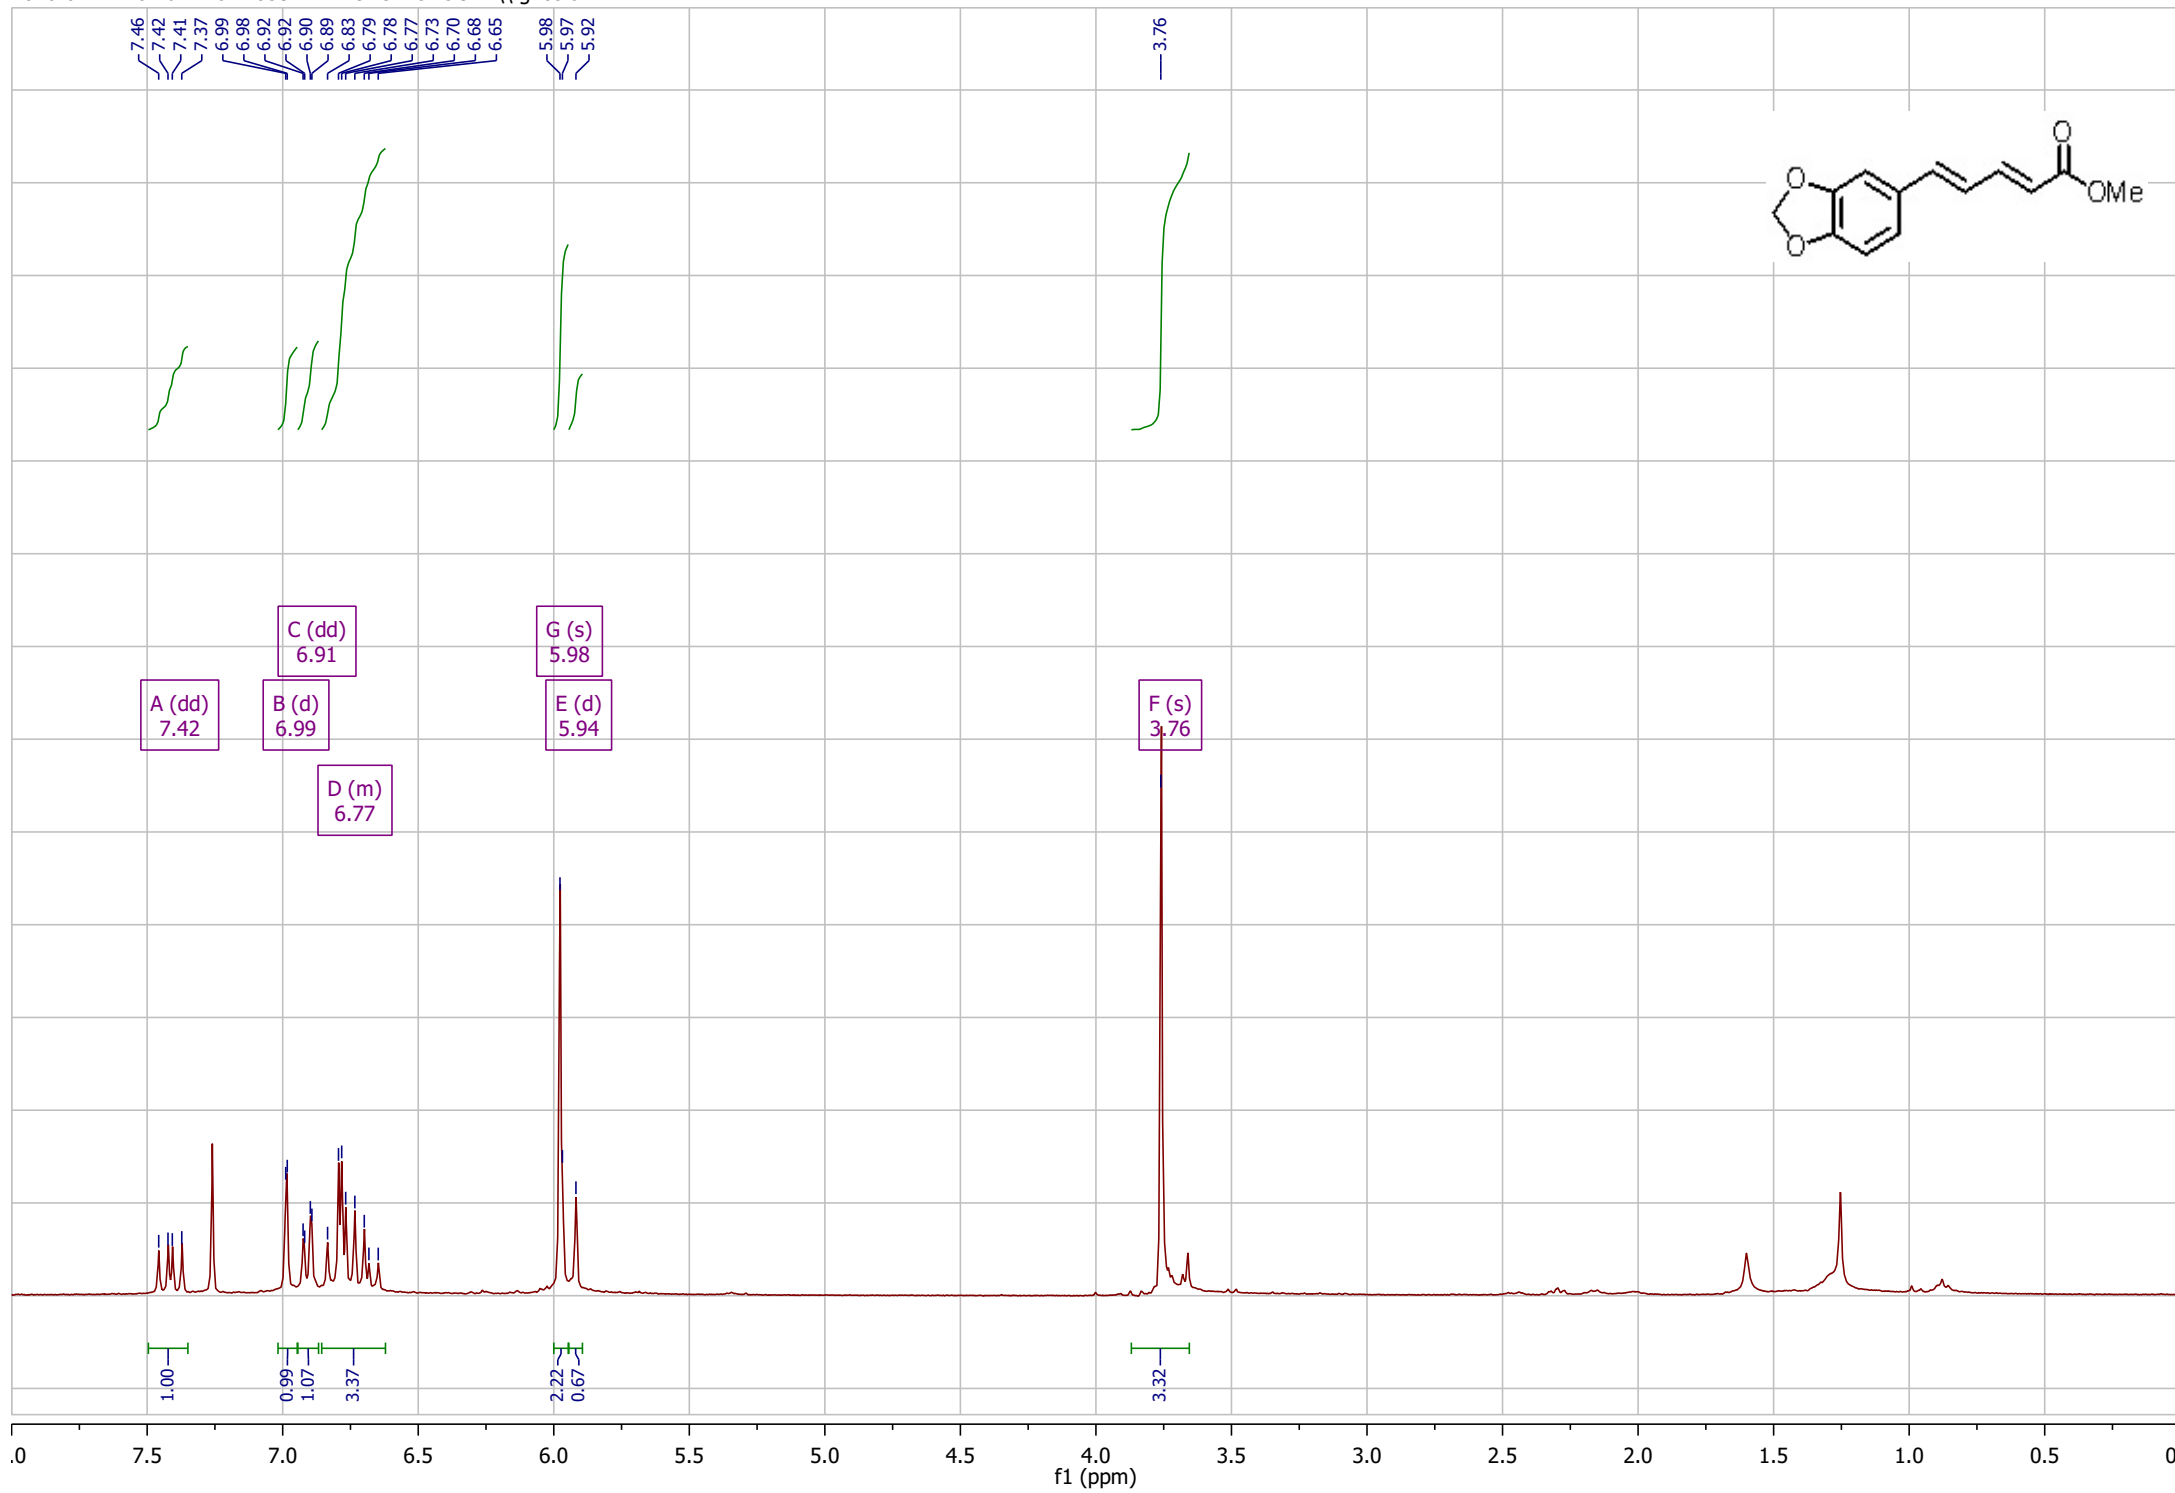

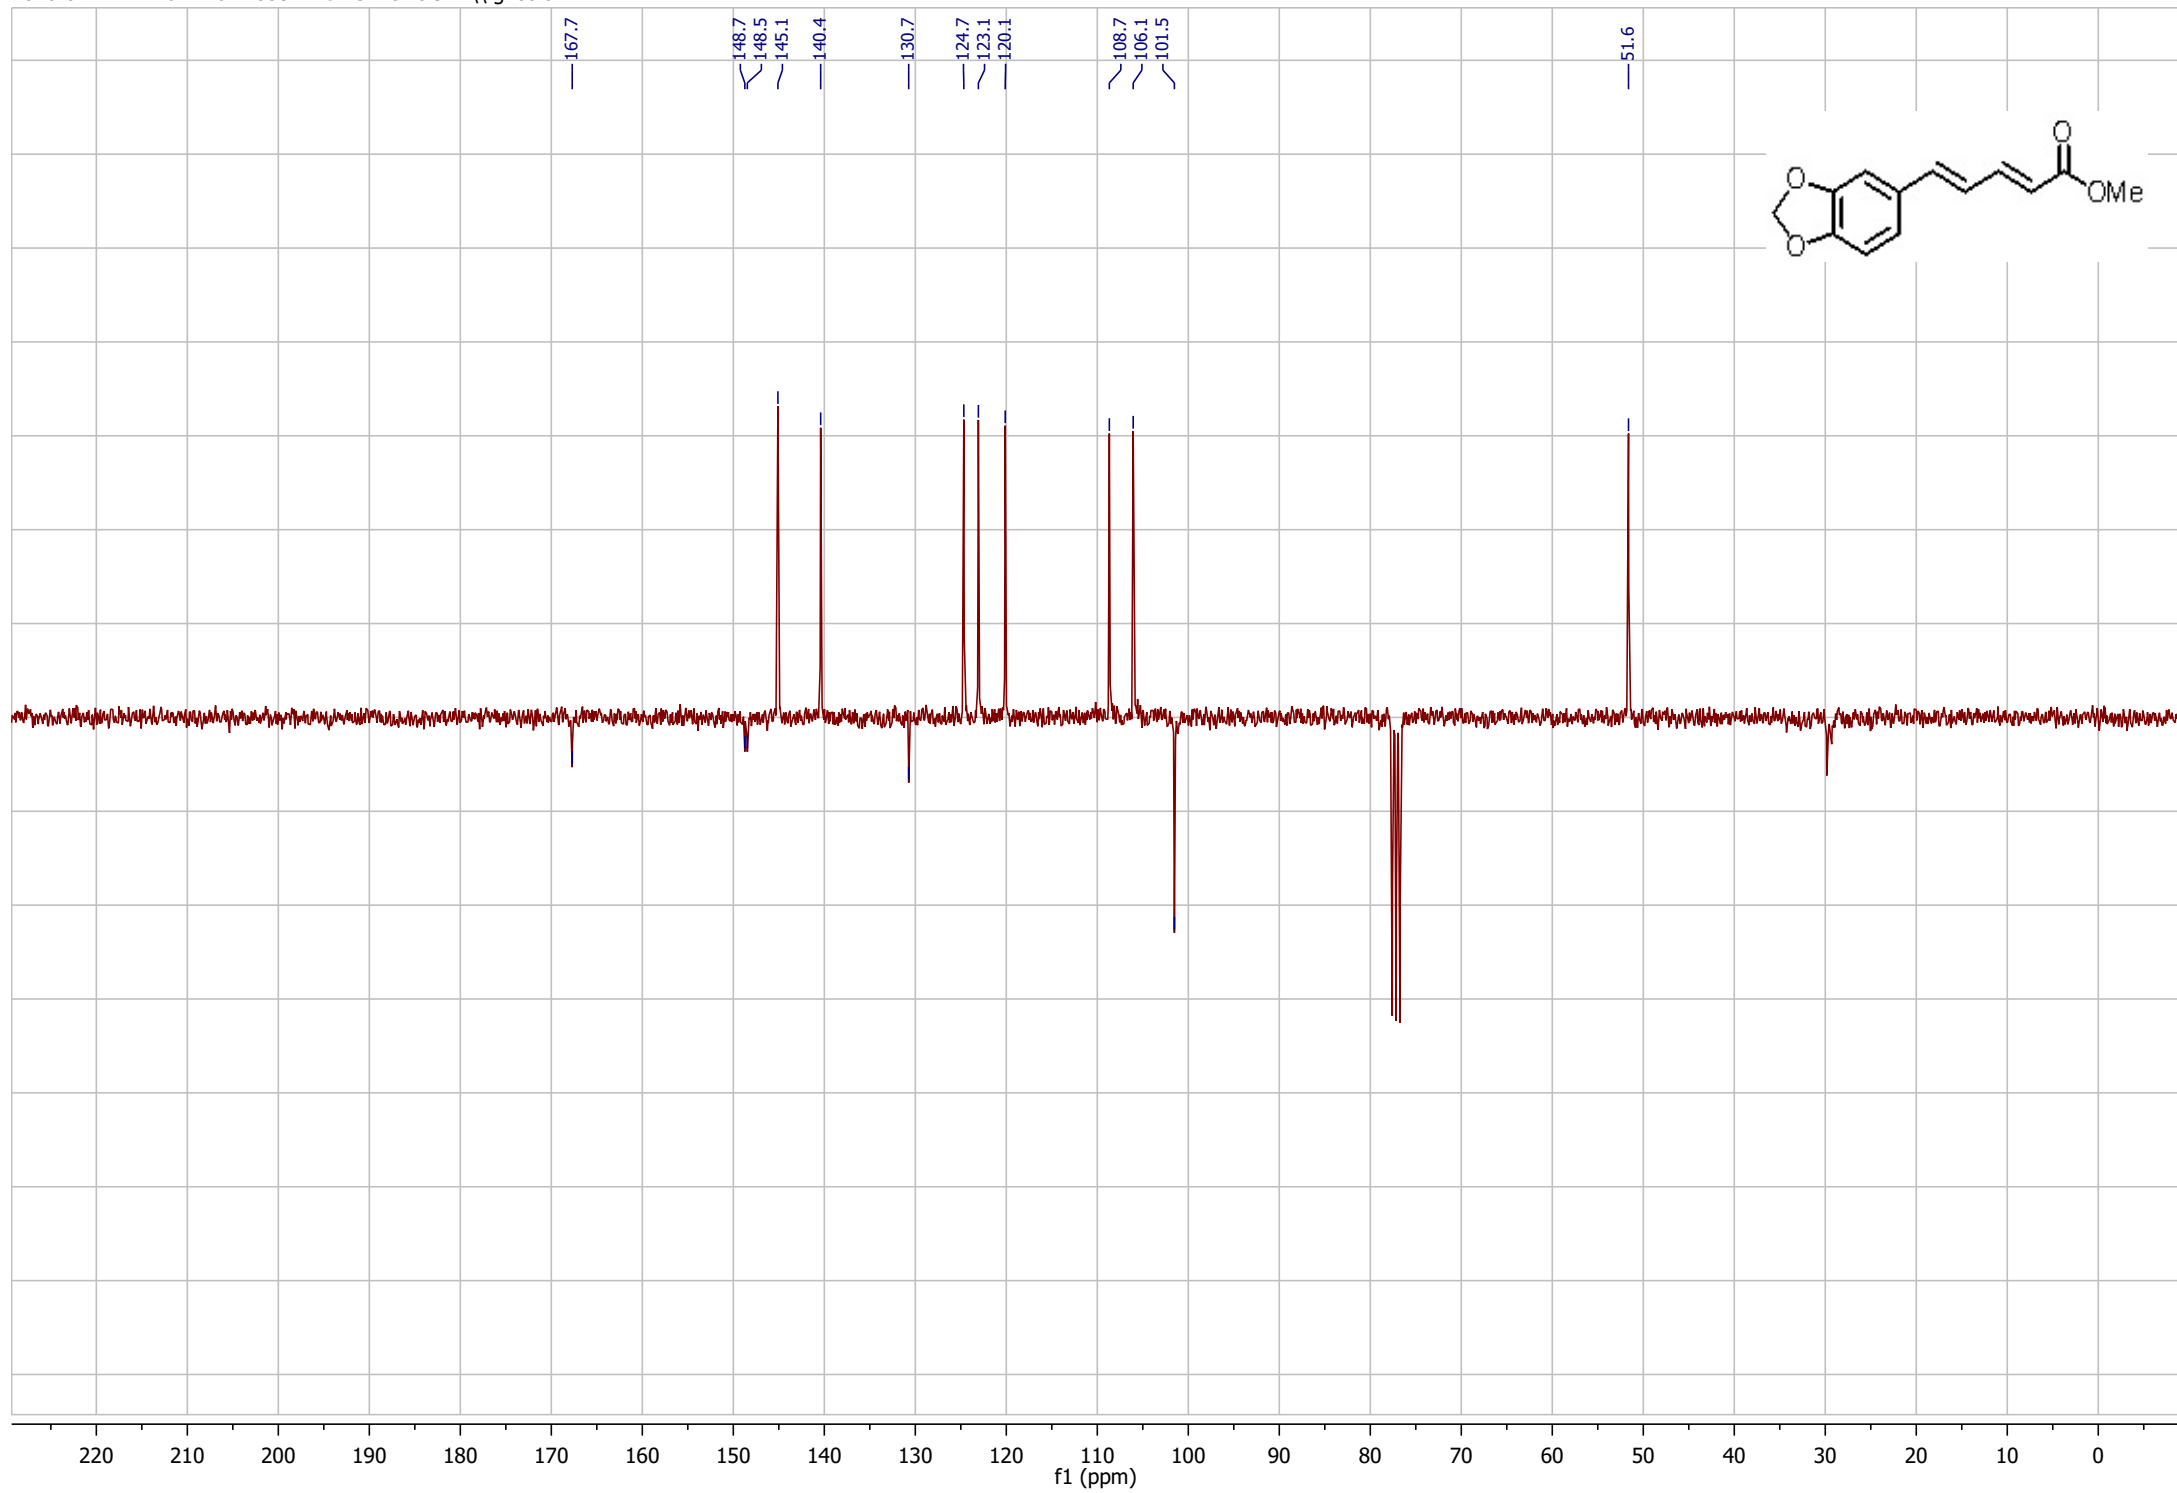

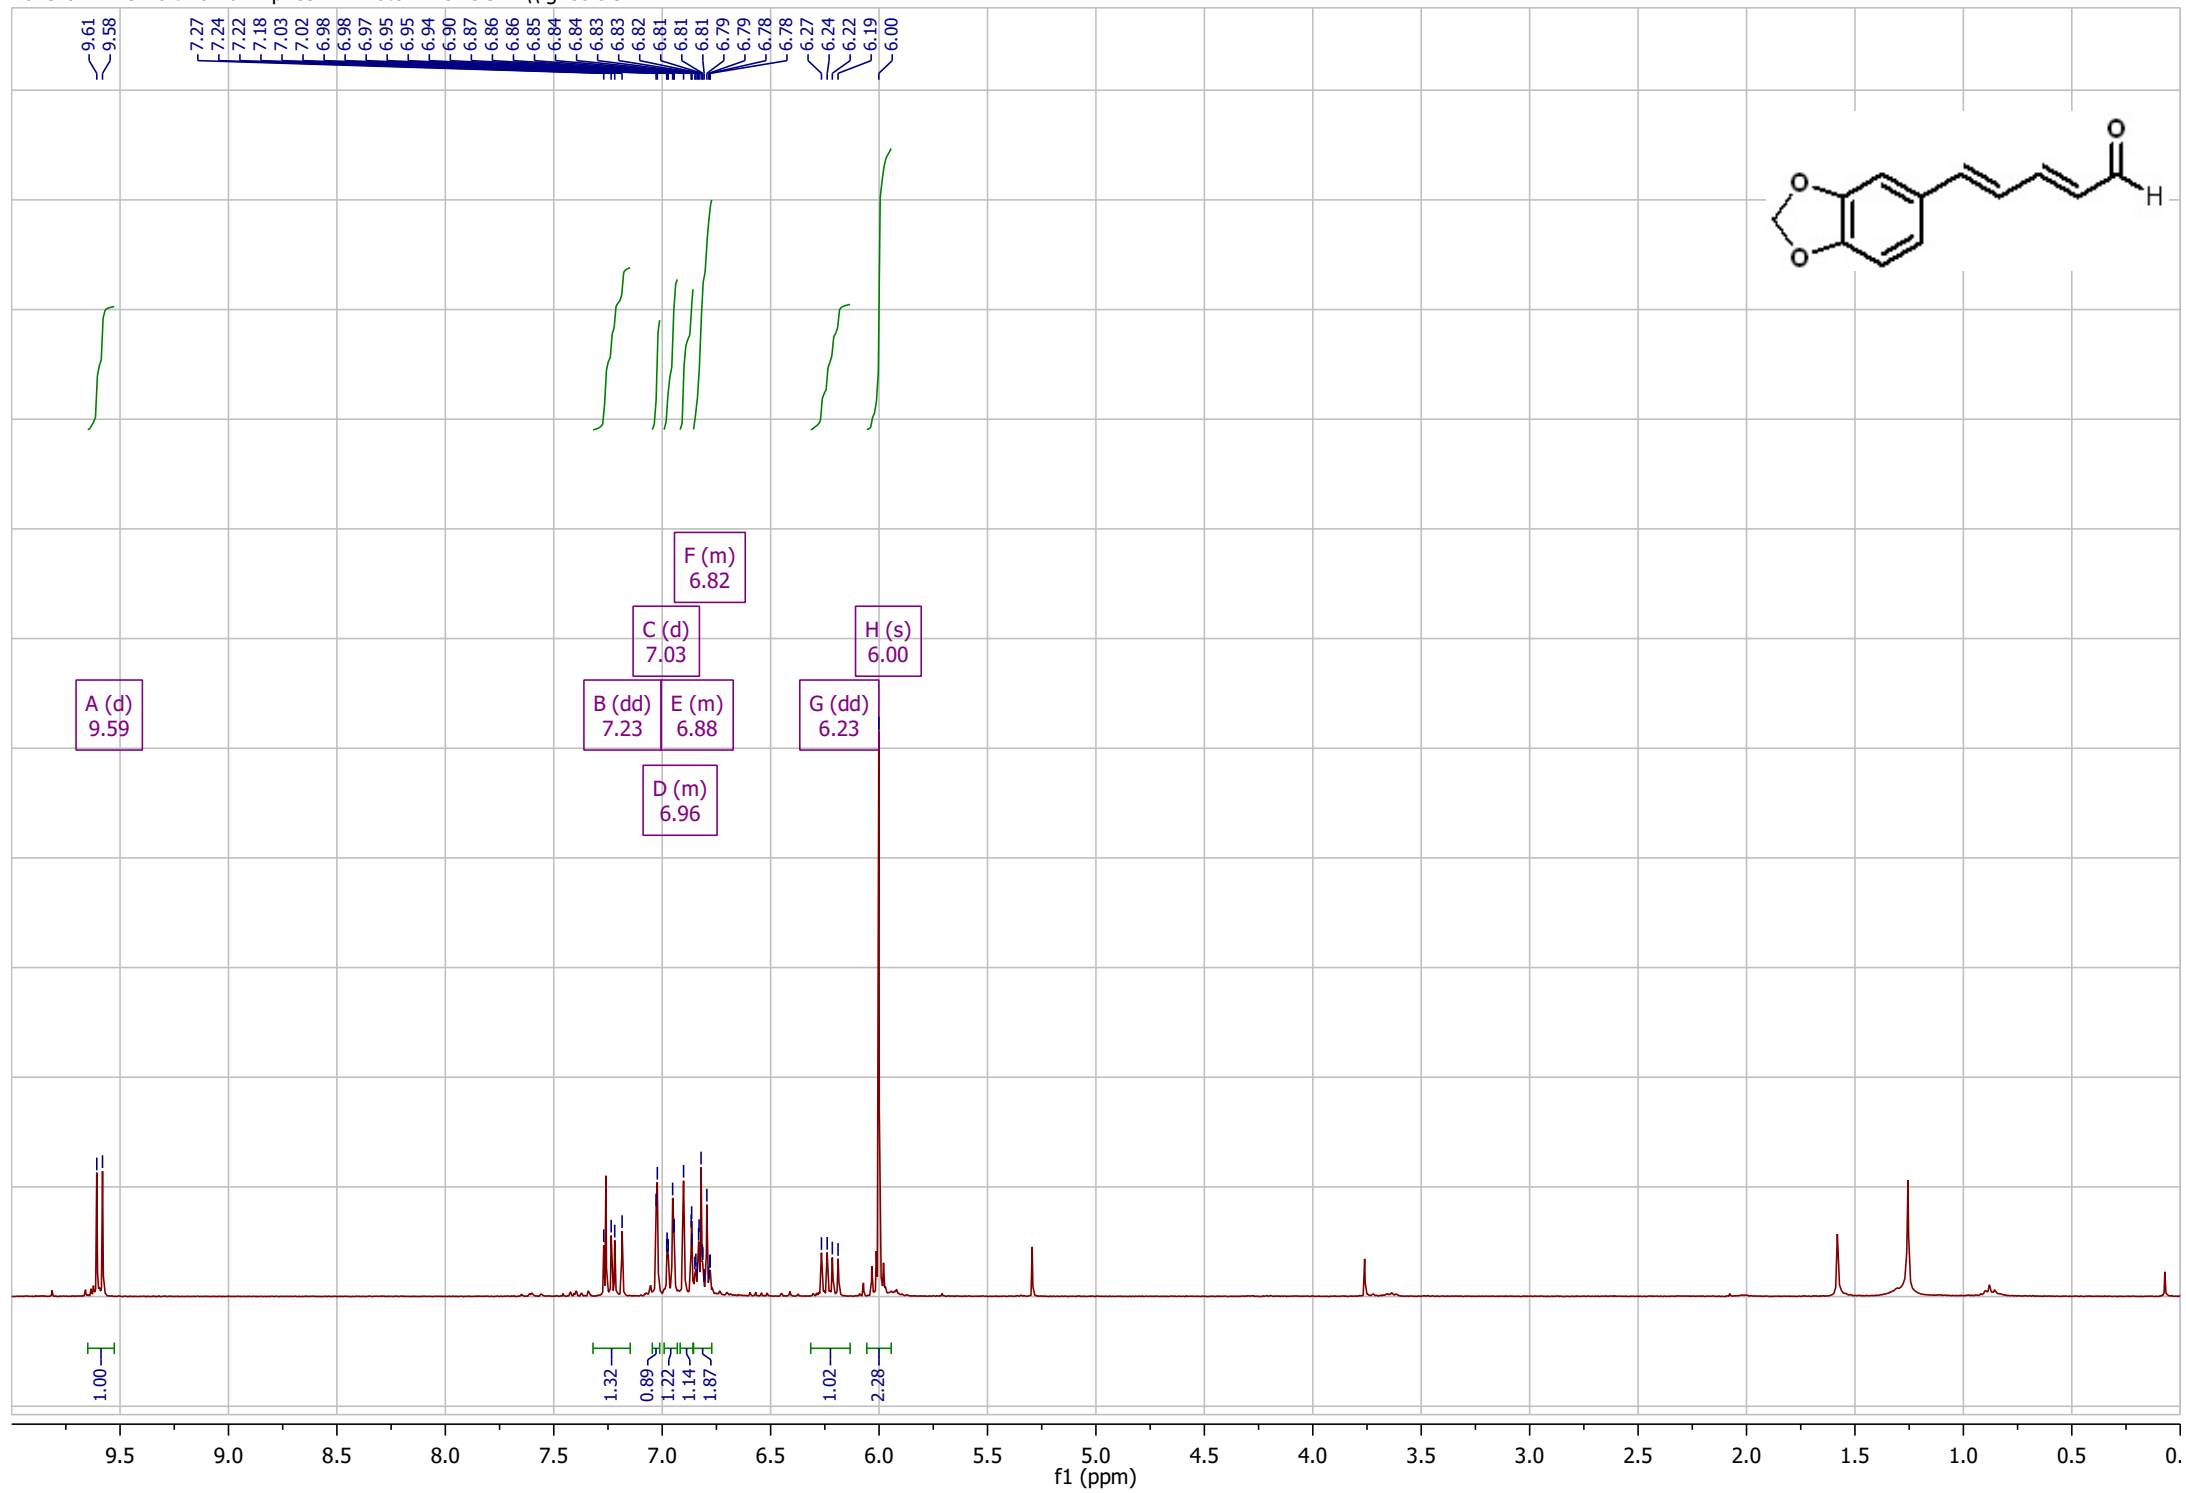

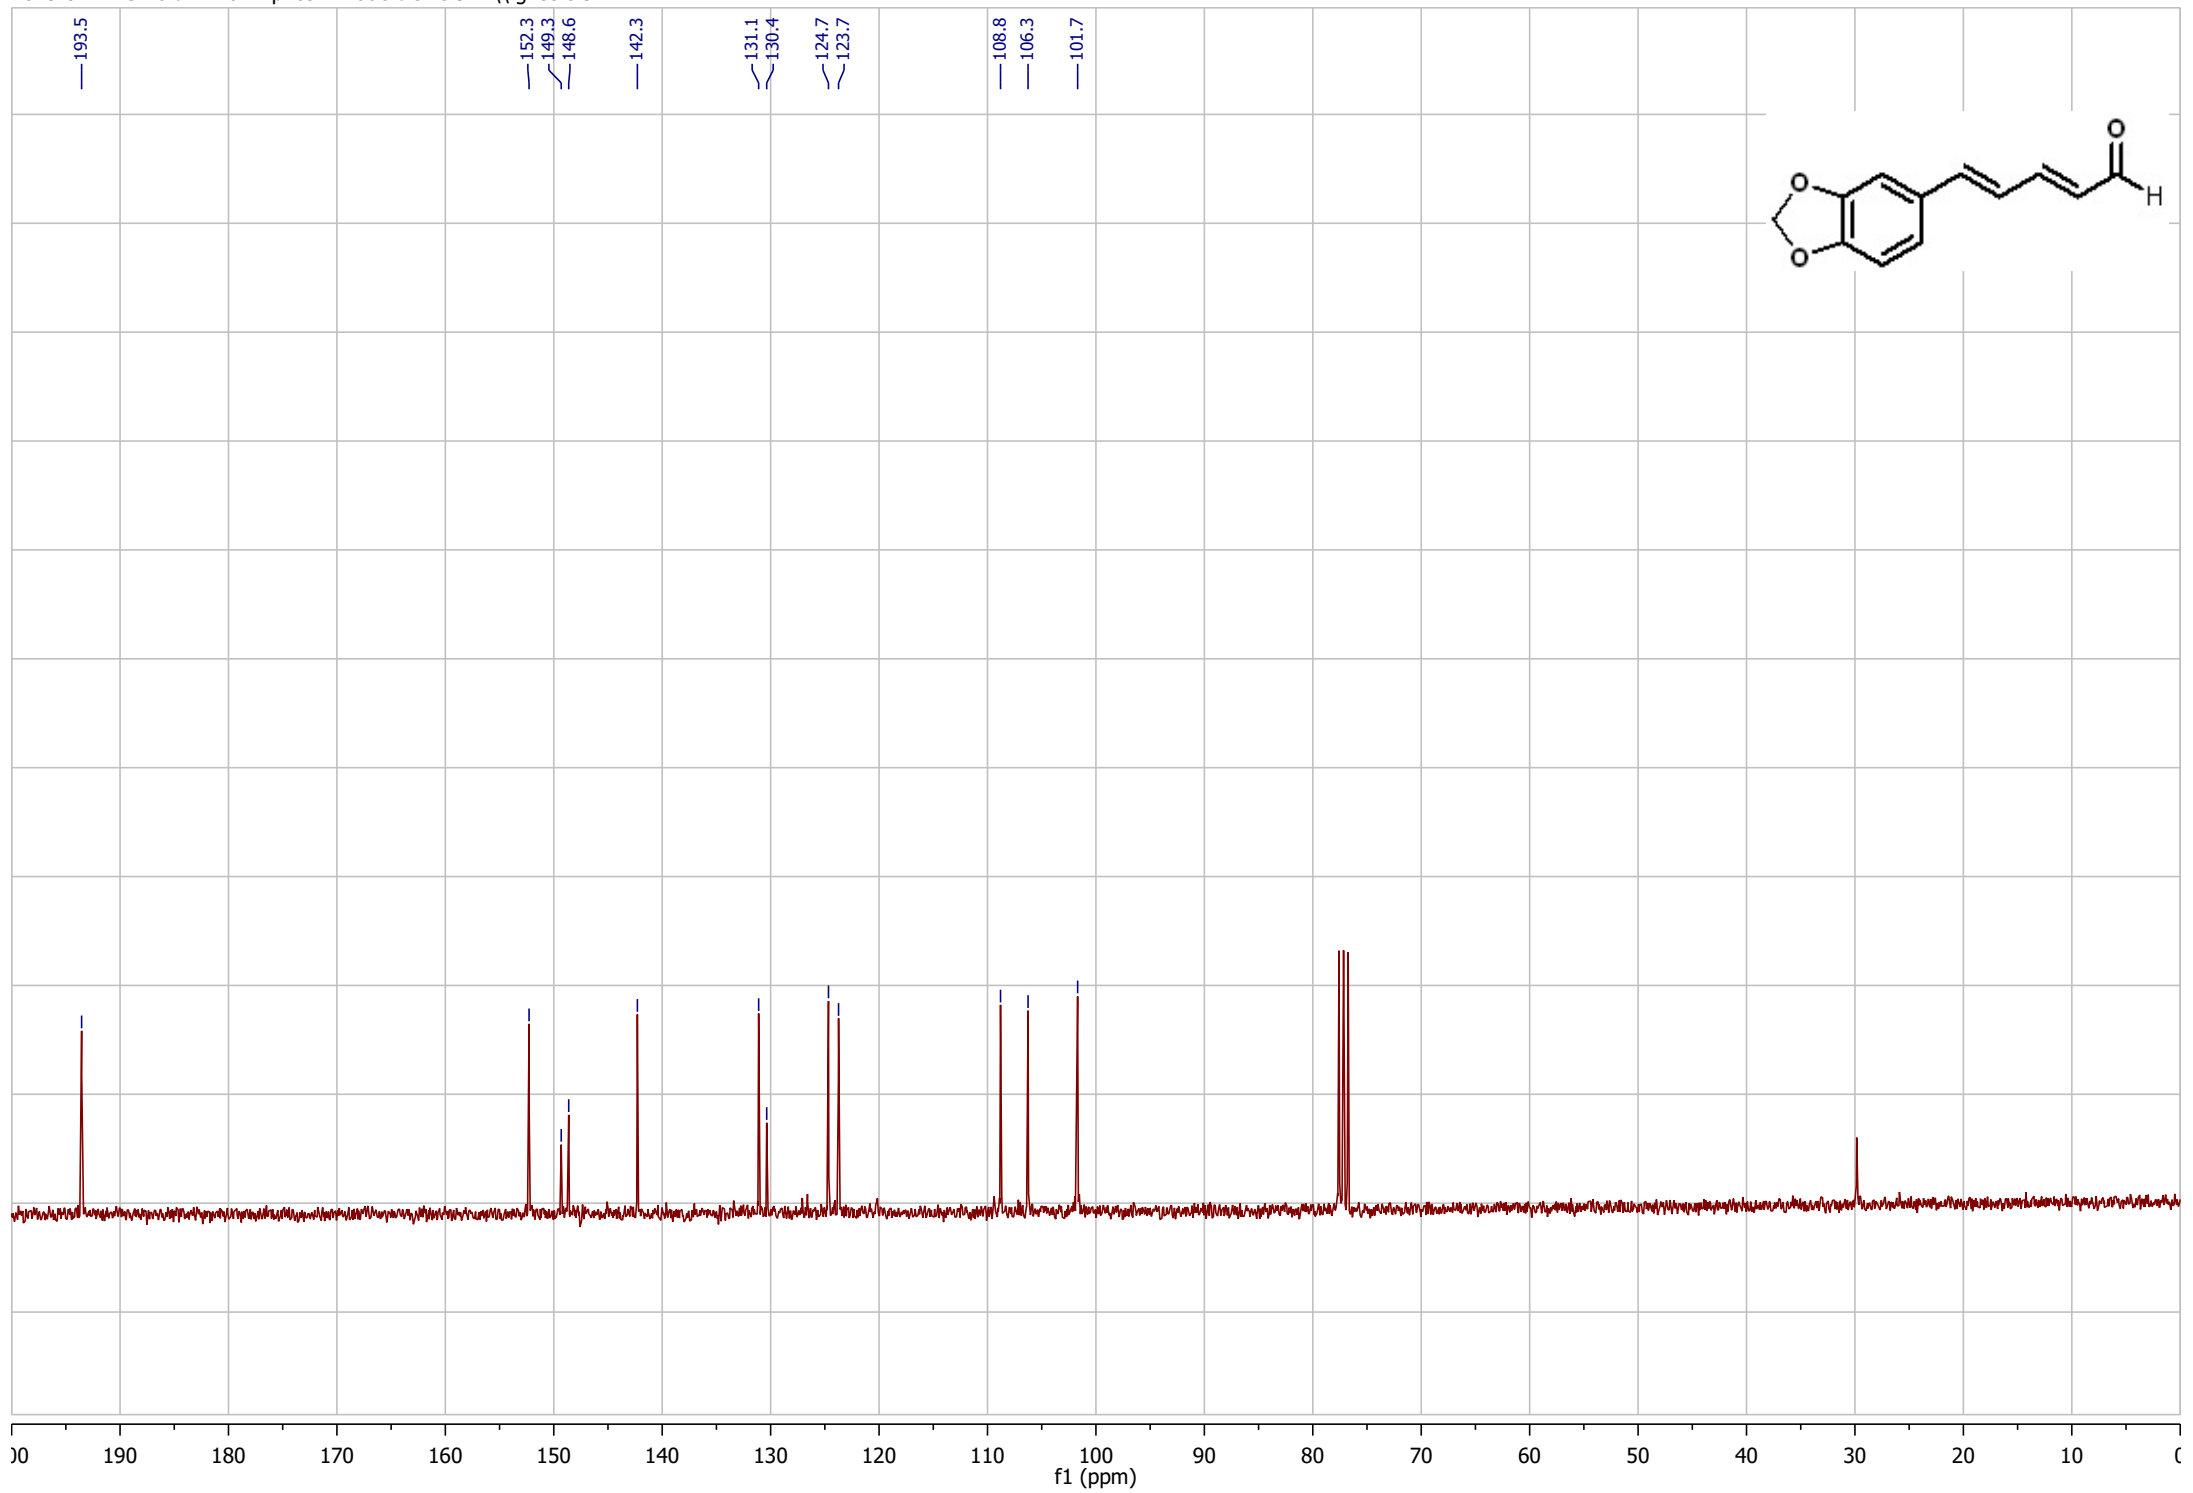

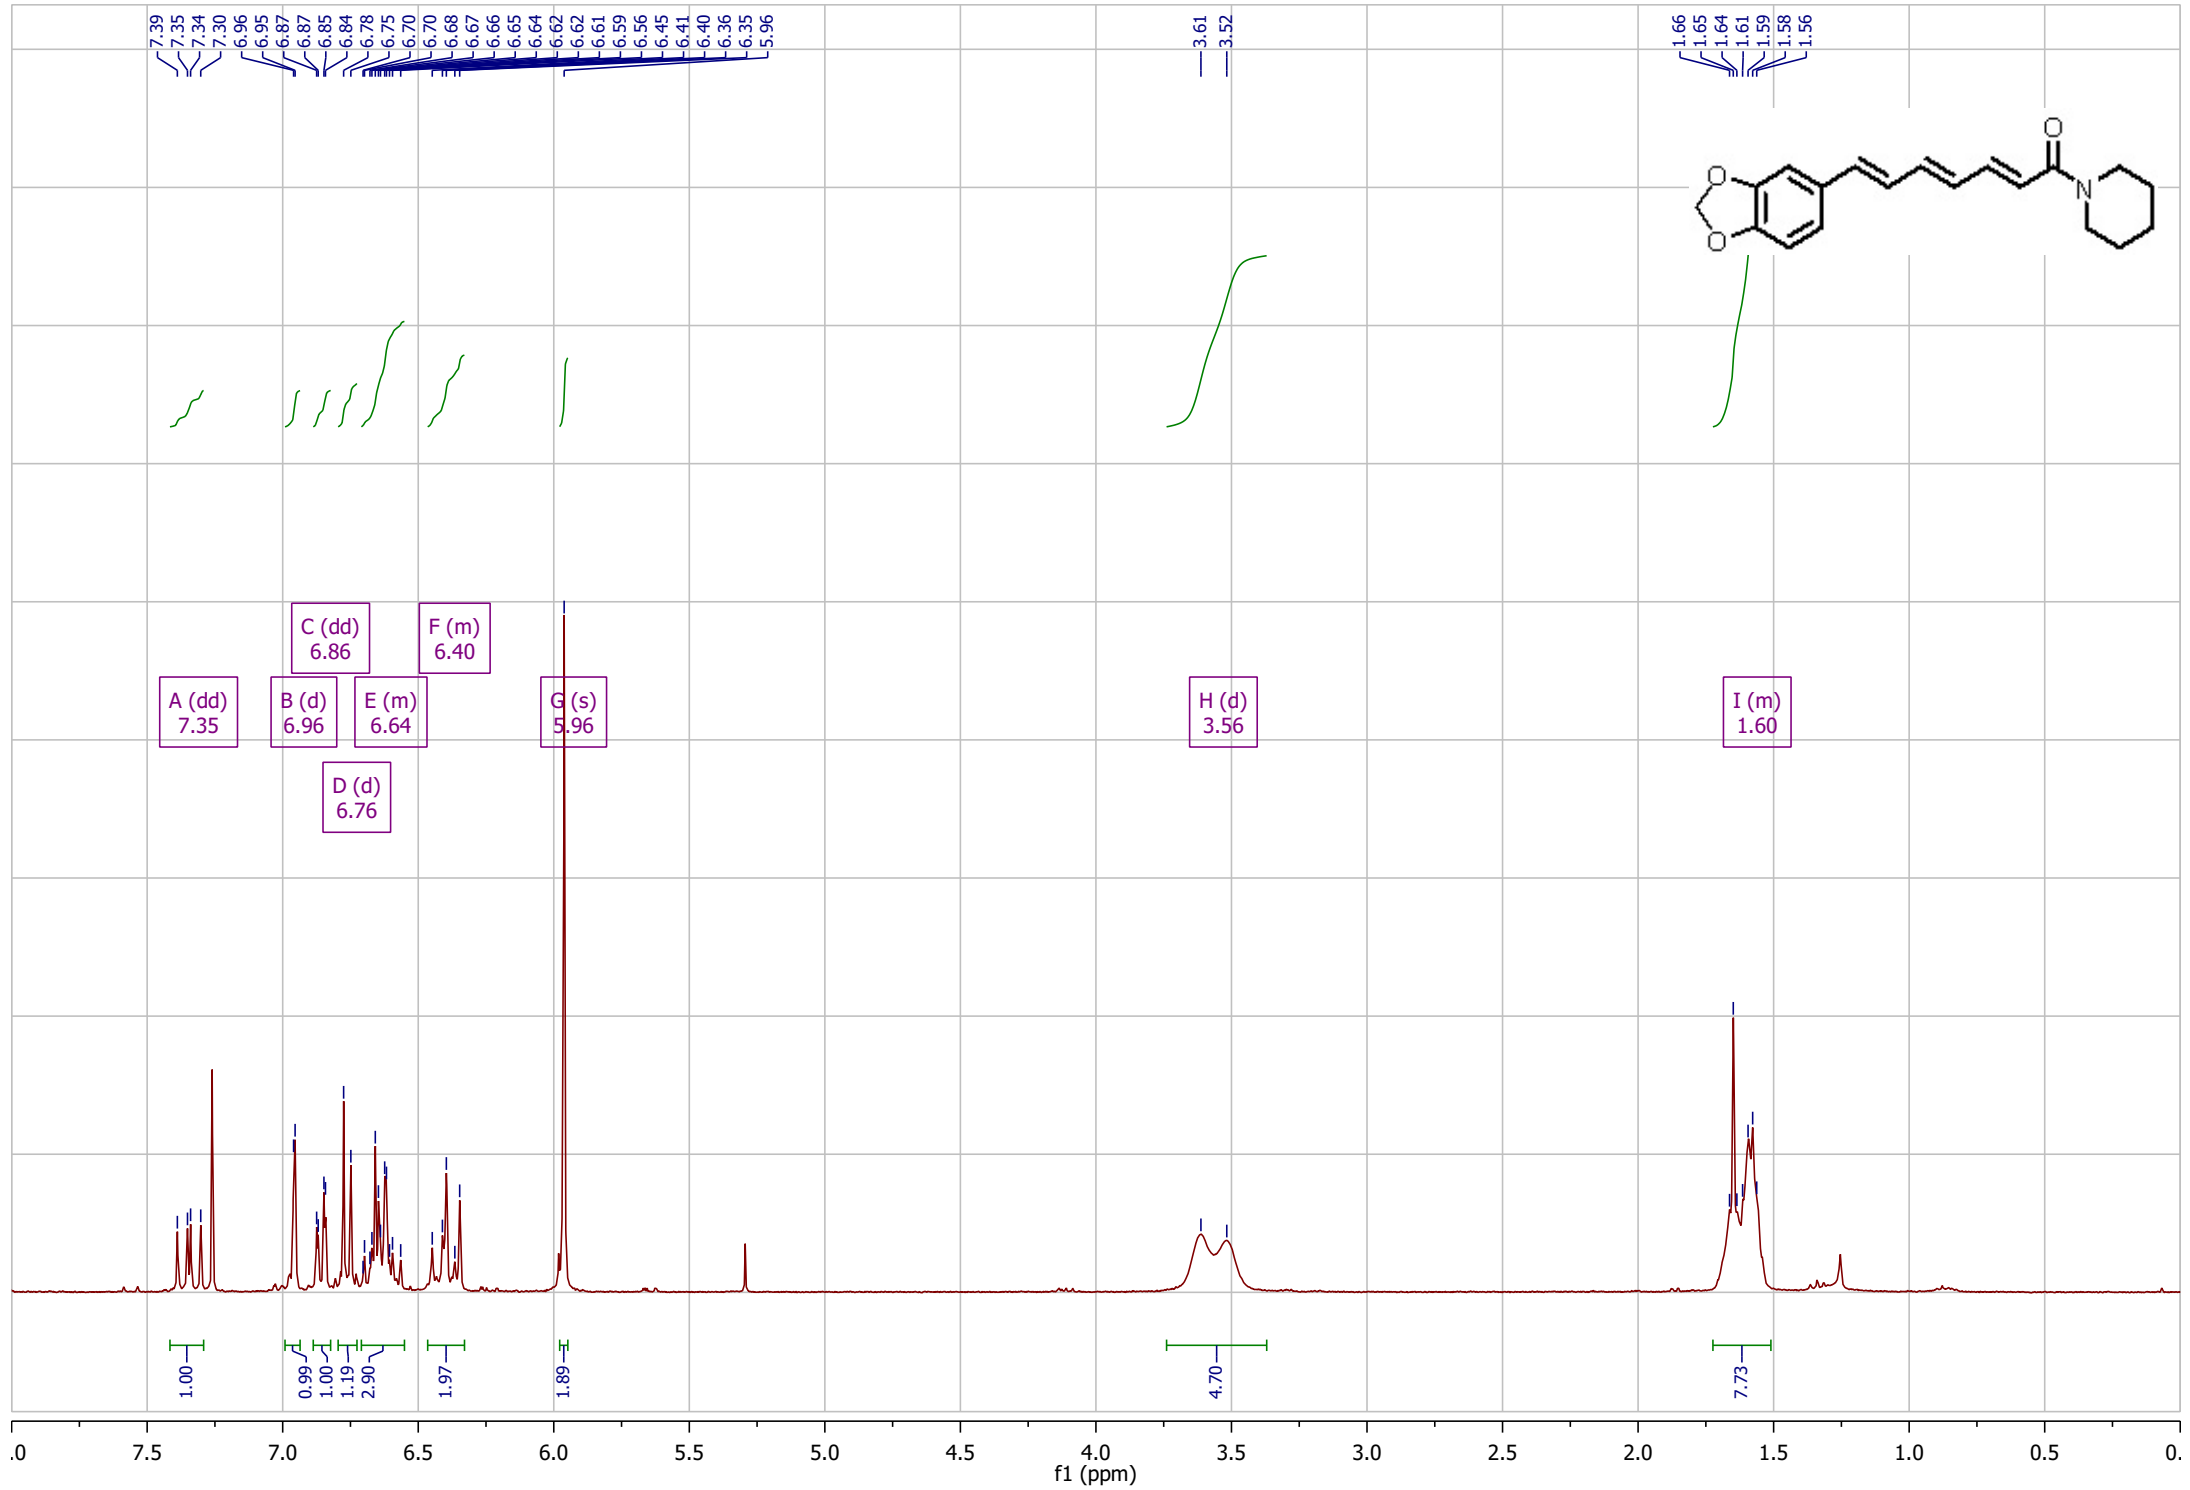

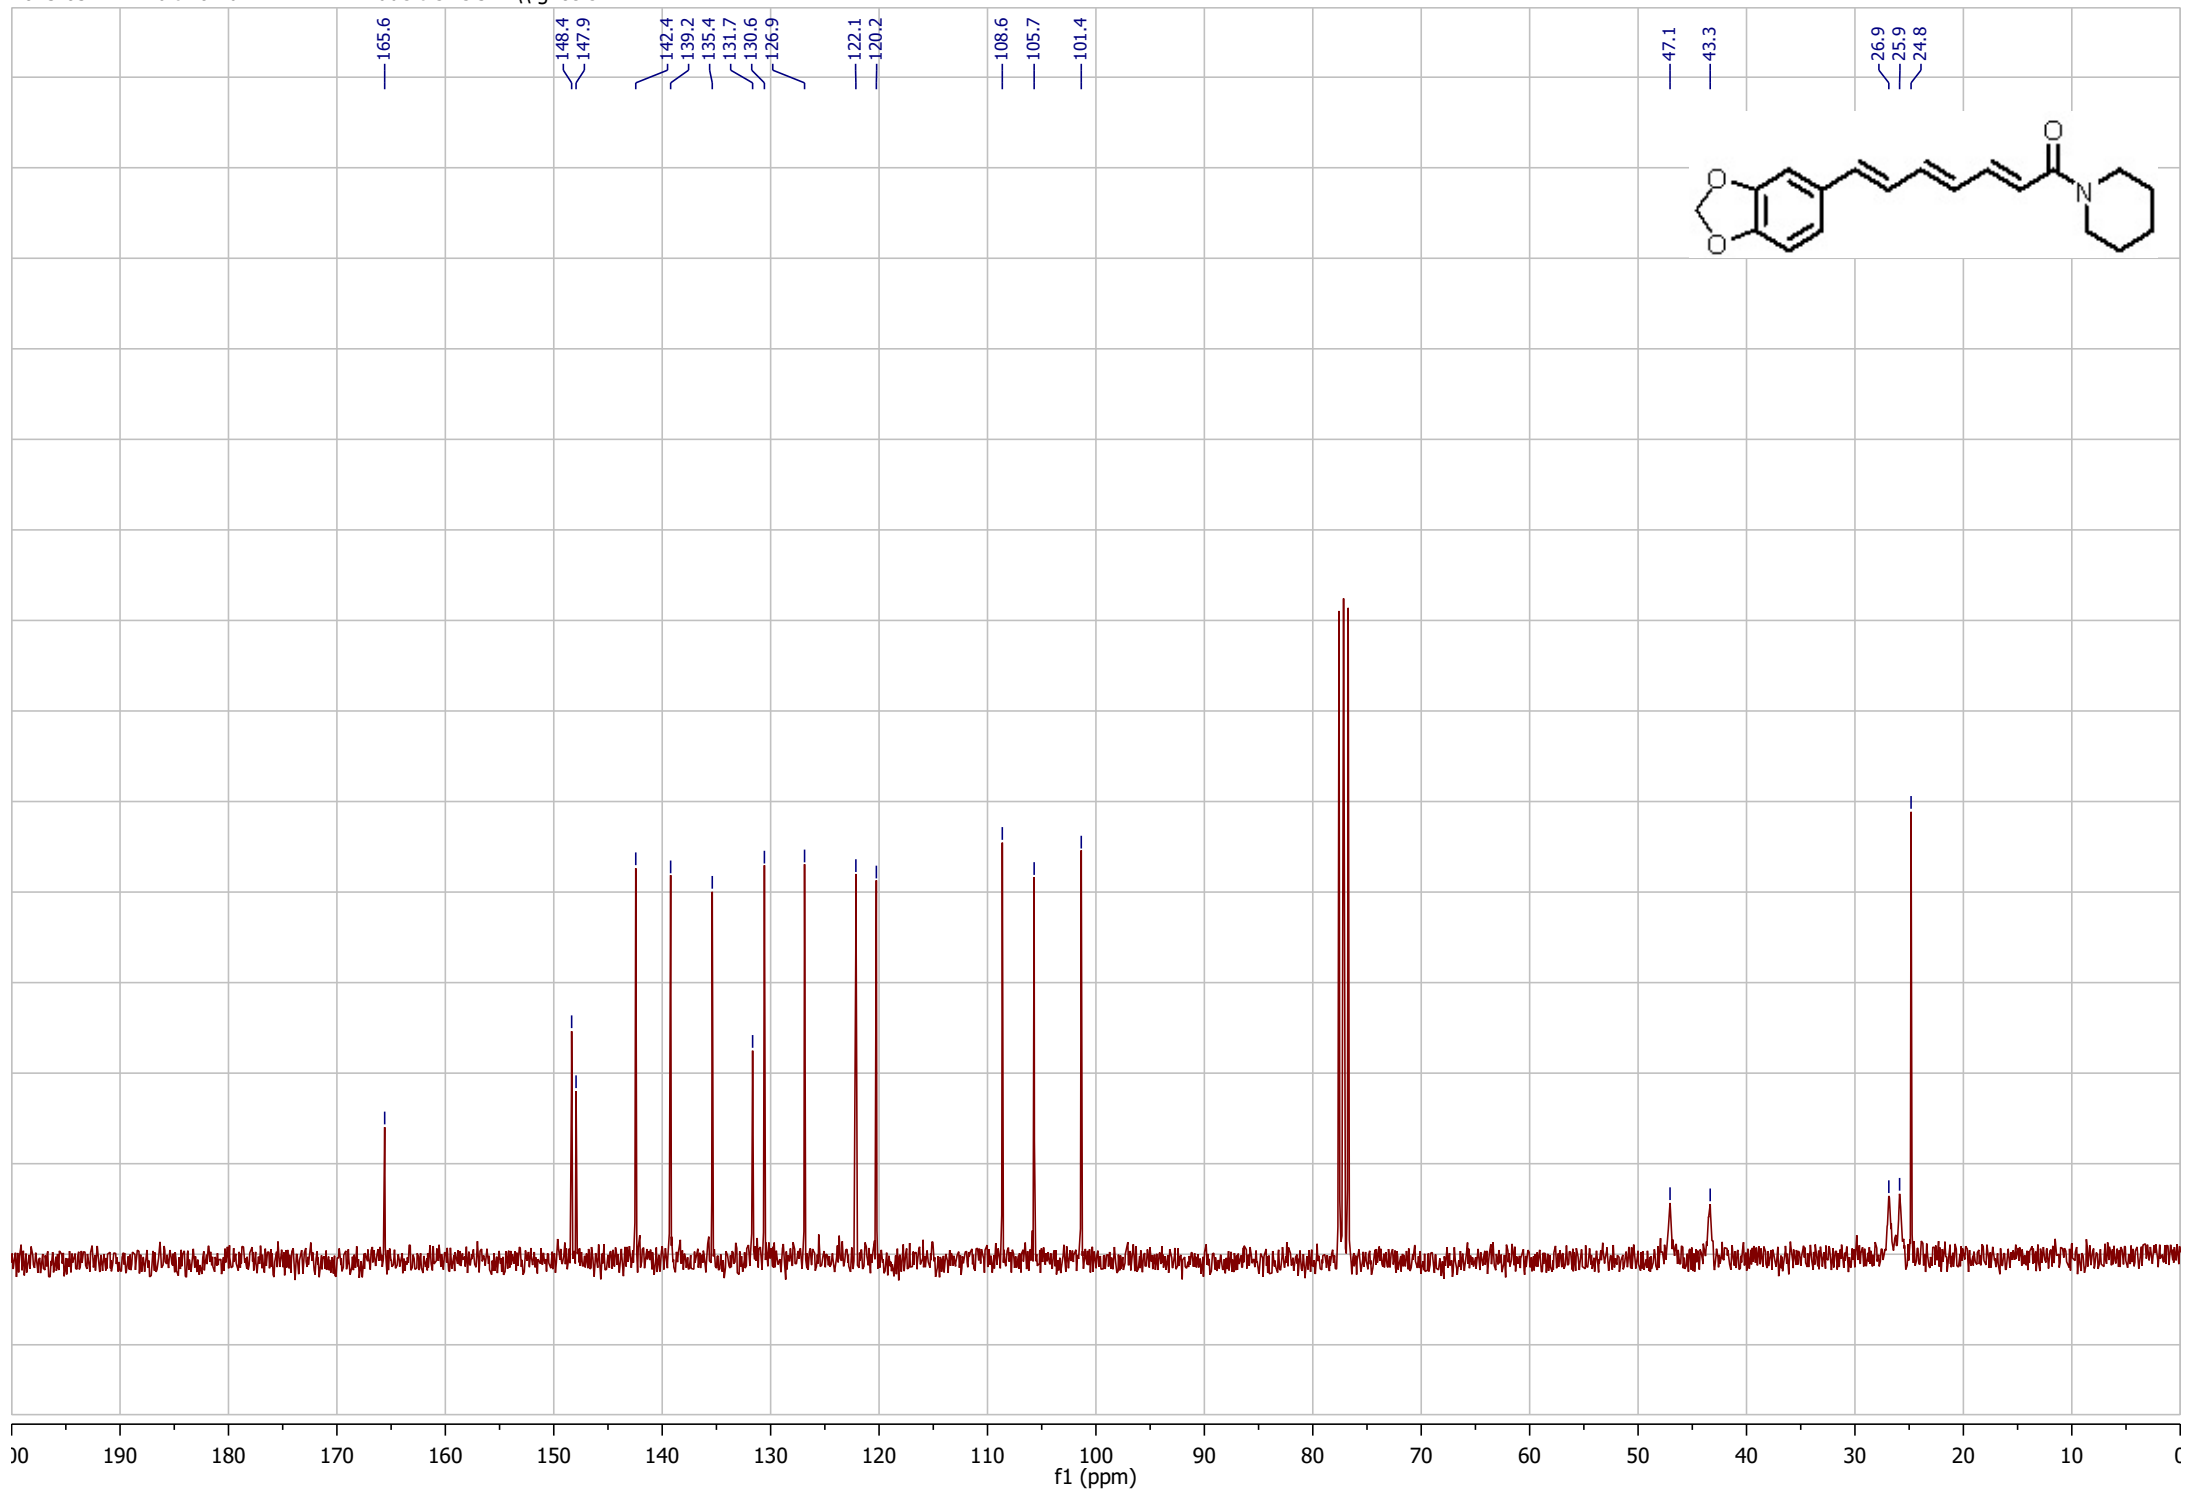

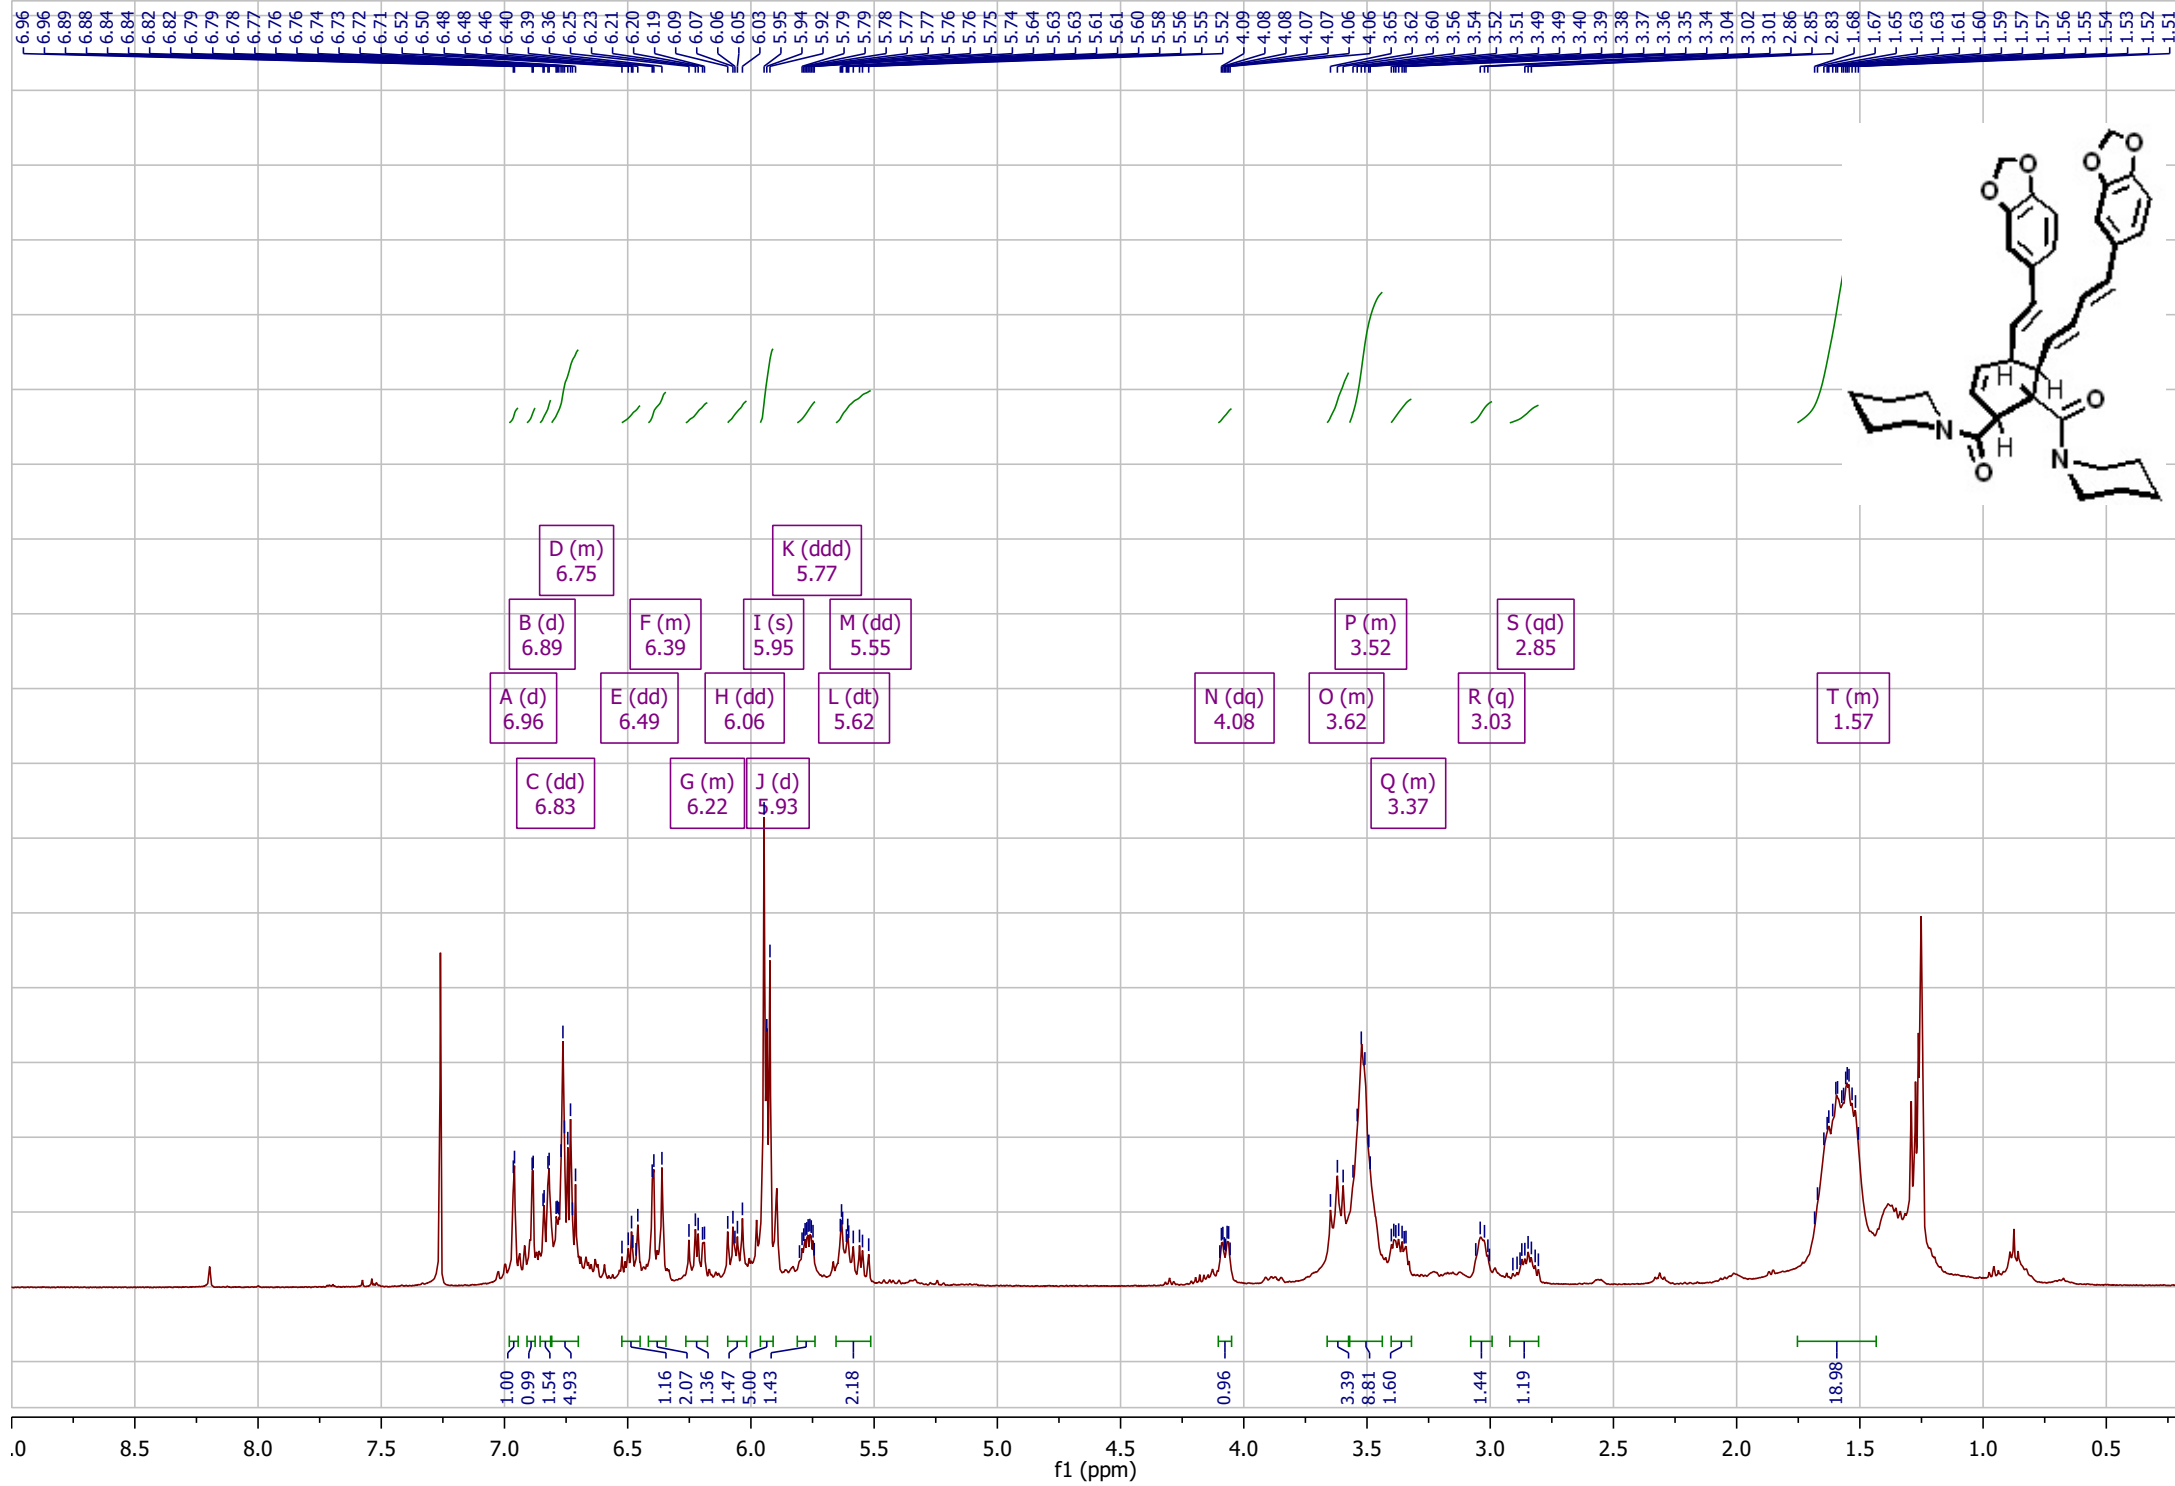

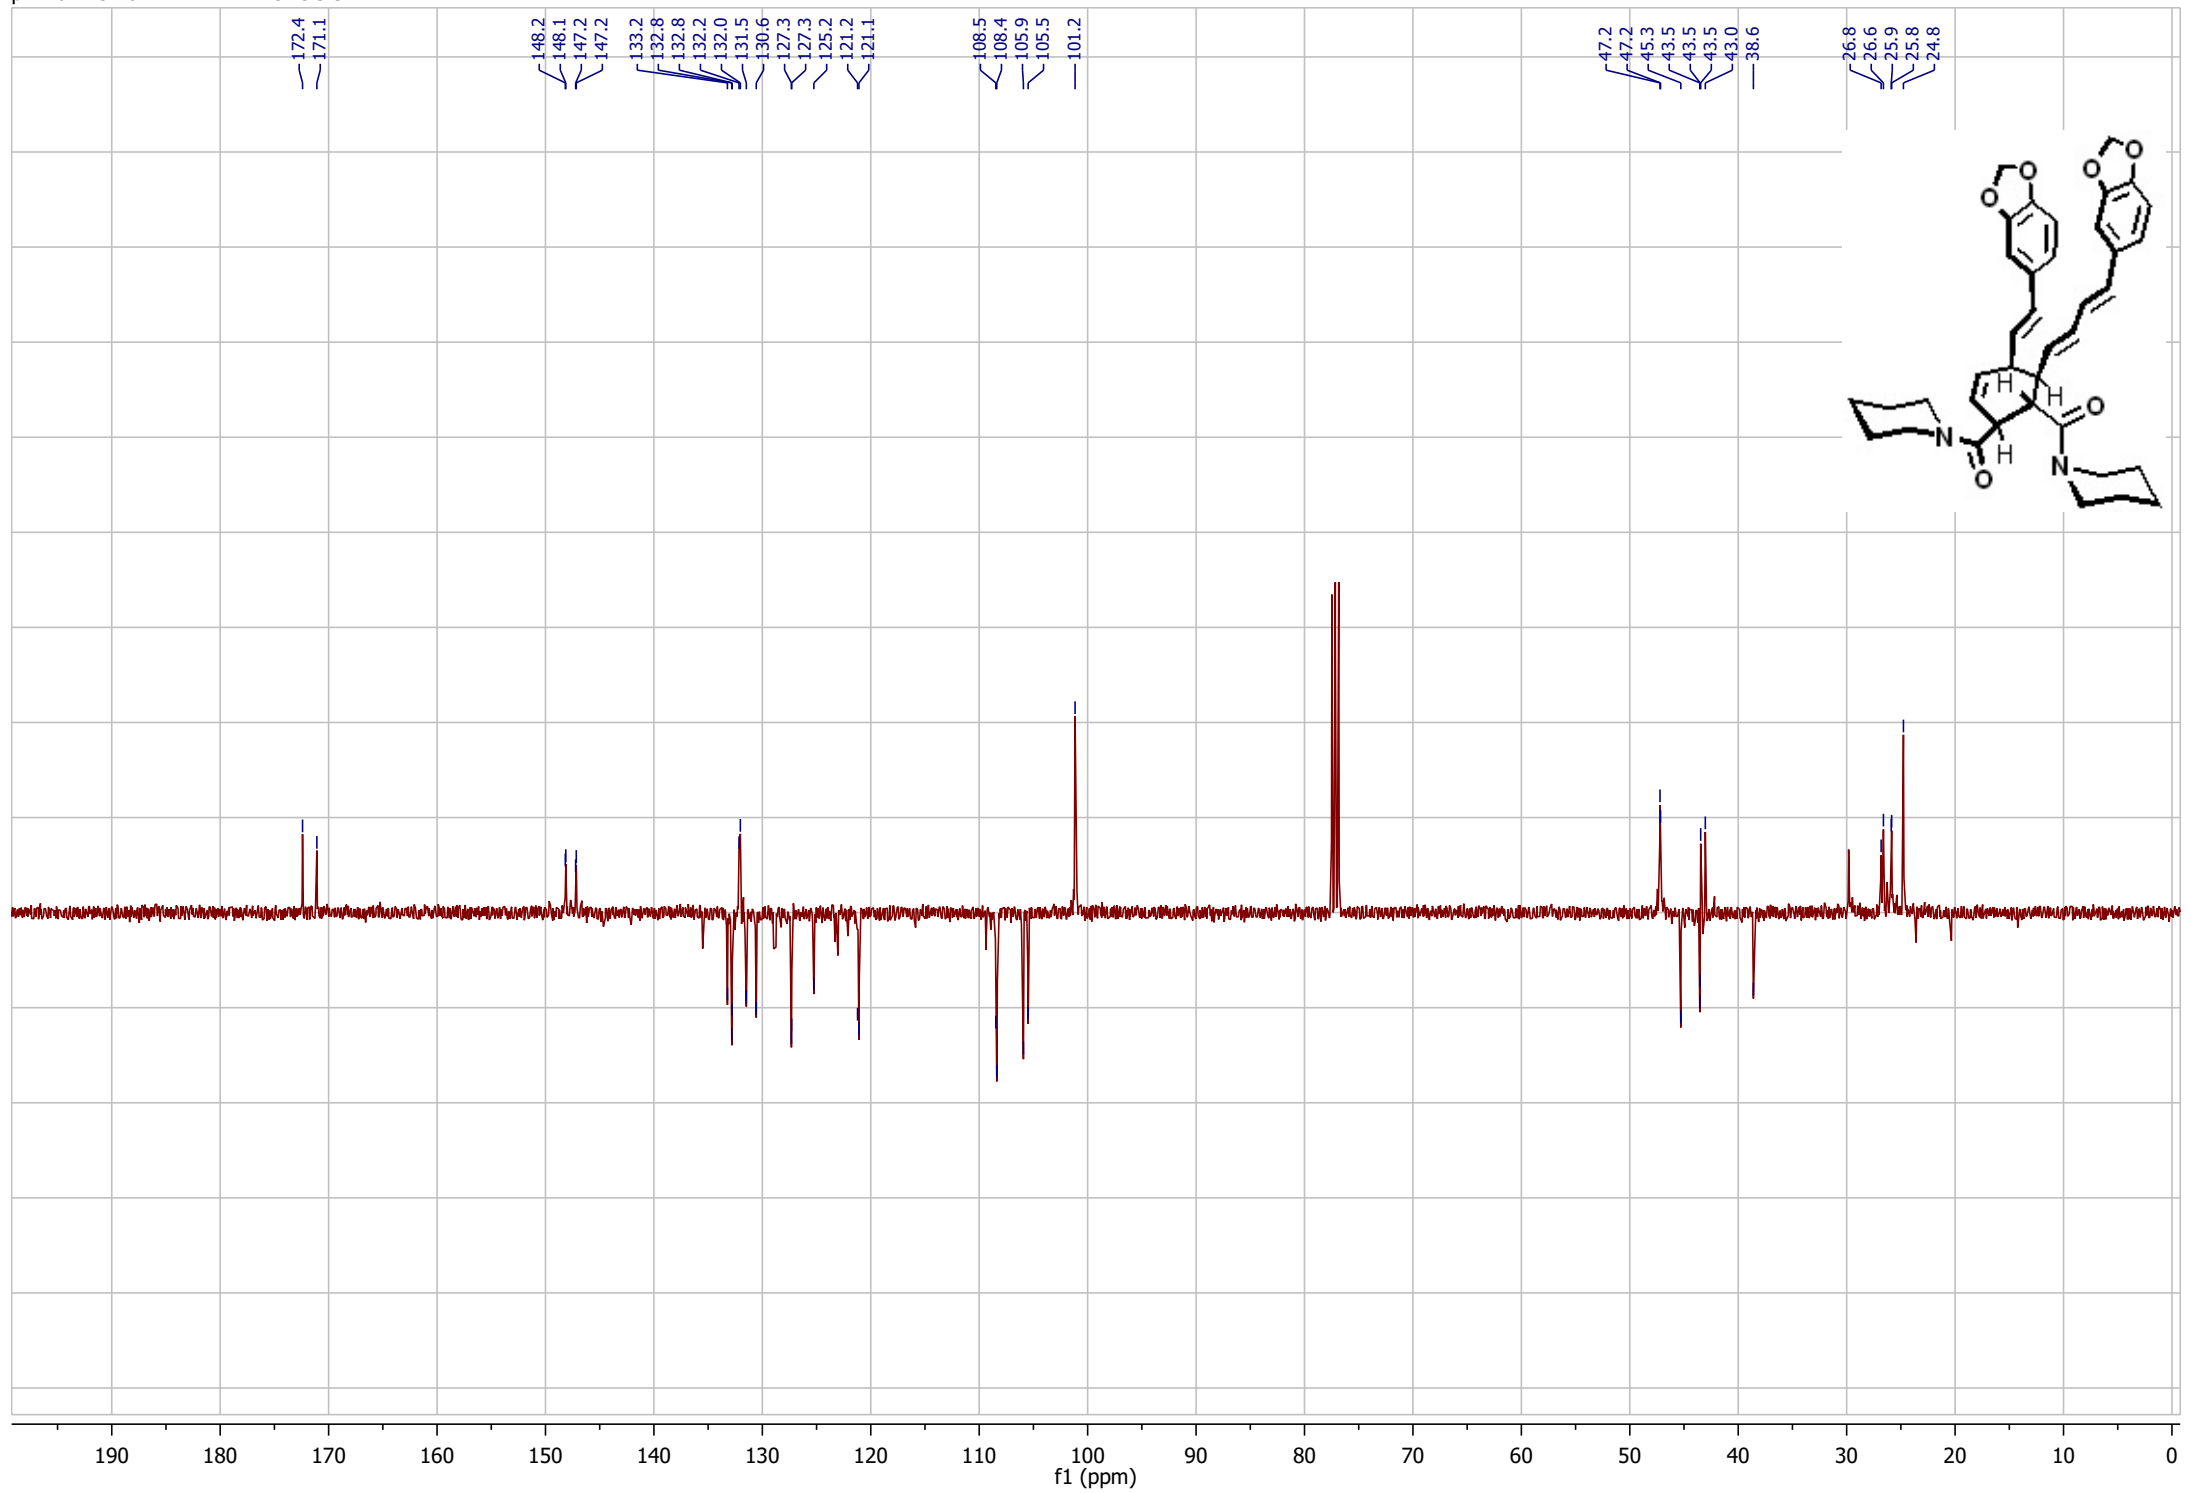

Supplement: d6cc01304j1.pdf [file d6cc01304j1.pdf]
